# Supplementary material for: The Soybean Laccase Gene Family: Evolution and Possible Roles in Plant Defense and Stem Strength Selection
Source: PubMed Central journal article supplement (PMC6770974; doi:10.3390/genes10090701), 2019-09-11
Supplement: genes-10-00701-s001.pdf [file genes-10-00701-s001.pdf]

**Table S1. Basic information of soybean laccases.** (Abbreviations and columns requiring detailed explanation are marked with an asterisk and explanations are given at the bottom of the table)

| <b>Gene name</b> | <b>Gene ID</b>         | <b>Chr*</b> | <b>Physical location</b> | <b>AAL(aa)*</b> | <b>MW(D)*</b> | <b>pI*</b> | <b>SL*</b>                             | <b>HRL(aa)*</b> | <b>TD*</b> | <b>SP*</b> | <b>PREDICTION*</b>   |
|------------------|------------------------|-------------|--------------------------|-----------------|---------------|------------|----------------------------------------|-----------------|------------|------------|----------------------|
| <i>GmLac1</i>    | <i>Glyma.01G108200</i> | Chr1        | 36947944-36957036        | 567             | 62552.64      | 5.58       | Extracellular                          | 14              | 0          | Y          | n4-18c23/24o         |
| <i>GmLac2</i>    | <i>Glyma.01G112600</i> | Chr1        | 38353594-38358163        | 557             | 61144.5       | 9.14       | Extracellular                          | 8               | 0          | Y          | n8-16c22/23o         |
| <i>GmLac3</i>    | <i>Glyma.01G173500</i> | Chr1        | 51045827-51048552        | 561             | 61859.84      | 8.08       | Extracellular;Lysosomal                | 11              | 0          | Y          | n9-20c27/28o         |
| <i>GmLac4</i>    | <i>Glyma.01G173600</i> | Chr1        | 51051683-51054726        | 564             | 62548.75      | 8.85       | Lysosomal                              | 11              | 0          | Y          | n13-24c30/31o        |
| <i>GmLac5</i>    | <i>Glyma.01G183100</i> | Chr1        | 51843424-51847358        | 540             | 60379.43      | 8.77       | Lysosomal                              | 11              | 0          | Y          | n6-17c24/25o         |
| <i>GmLac6</i>    | <i>Glyma.02G224800</i> | Chr2        | 41222747-41227060        | 557             | 61357.92      | 9.41       | Extracellular                          | 11              | 0          | Y          | n8-19c23/24o         |
| <i>GmLac7</i>    | <i>Glyma.02G231600</i> | Chr2        | 41882853-41885826        | 575             | 63054.23      | 8.98       | Extracellular;PlasmaMembrane           | 11              | 0          | Y          | n11-22c29/30o        |
| <i>GmLac8</i>    | <i>Glyma.02G261600</i> | Chr2        | 44758969-44763198        | 569             | 62620.24      | 6.97       | Extracellular                          | 11              | 0          | Y          | n8-19c24/25o         |
| <i>GmLac9</i>    | <i>Glyma.03G077900</i> | Chr3        | 19361933-19366381        | 557             | 61150.55      | 9.1        | Extracellular                          | 7               | 0          | Y          | n9-16c22/23o         |
| <i>GmLac10</i>   | <i>Glyma.04G019500</i> | Chr4        | 1525860-1533999          | 547             | 60677.86      | 9.42       | Extracellular                          | 18              | 0          | Y          | n5-23c28/29o         |
| <i>GmLac11</i>   | <i>Glyma.04G119600</i> | Chr4        | 14443110-14447983        | 592             | 65989.74      | 6.9        | Extracellular;PlasmaMembrane           | 13              | 1          | Y          | n4-17c23/24o569-591i |
| <i>GmLac12</i>   | <i>Glyma.05G056100</i> | Chr5        | 5123859-5128473          | 597             | 67145.88      | 9.09       | Extracellular                          | 15              | 0          | Y          | n9-24c29/30o         |
| <i>GmLac13</i>   | <i>Glyma.05G082700</i> | Chr5        | 13157352-13160970        | 425             | 47723.8       | 9.35       | Extracellular                          |                 | 0          | 0          | i                    |
| <i>GmLac14</i>   | <i>Glyma.06G019800</i> | Chr6        | 1494230-1501925          | 547             | 60813.04      | 9.38       | Extracellular                          | 18              | 0          | Y          | n5-23c28/29o         |
| <i>GmLac15</i>   | <i>Glyma.06G284300</i> | Chr6        | 47271762-47274605        | 396             | 43729.76      | 8.91       | Extracellular;PlasmaMembrane           | 7               | 1          | Y          | n2-9c13/14o37-57i    |
| <i>GmLac16</i>   | <i>Glyma.06G307100</i> | Chr6        | 49594181-49599176        | 537             | 60120.76      | 7.63       | Extracellular                          | 10              | 0          | Y          | n7-17c22/23o         |
| <i>GmLac17</i>   | <i>Glyma.06G318800</i> | Chr6        | 50742178-50747062        | 591             | 65687.37      | 6.47       | Extracellular;PlasmaMembrane           | 14              | 1          | Y          | n4-18c23/24o569-590i |
| <i>GmLac18</i>   | <i>Glyma.07G054100</i> | Chr7        | 4733502-4736103          | 572             | 64035.46      | 7.63       | Extracellular;PlasmaMembrane           | 11              | 0          | Y          | n4-15c20/21o         |
| <i>GmLac19</i>   | <i>Glyma.07G054200</i> | Chr7        | 4742597-4747000          | 572             | 64096.48      | 8.72       | Extracellular;PlasmaMembrane;Lysosomal | 8               | 0          | Y          | n4-12c20/21o         |
| <i>GmLac20</i>   | <i>Glyma.07G133900</i> | Chr7        | 15868910-15873228        | 579             | 64138.44      | 9.22       | Extracellular;PlasmaMembrane;Lysosomal | 20              | 1          | 0          | i12-32o              |
| <i>GmLac21</i>   | <i>Glyma.07G134100</i> | Chr7        | 15880168-15883379        | 584             | 65179.59      | 9.94       | Mitochondrial;Peroxisomal              | 11              | 0          | Y          | n14-25c31/32o        |
| <i>GmLac22</i>   | <i>Glyma.07G142400</i> | Chr7        | 16921847-16926142        | 572             | 63025.16      | 8.66       | Extracellular                          | 11              | 0          | Y          | n3-14c22/23o         |
| <i>GmLac23</i>   | <i>Glyma.07G142500</i> | Chr7        | 16929178-16933812        | 573             | 63888.18      | 8.79       | Extracellular                          | 15              | 0          | Y          | n3-18c24/25o         |
| <i>GmLac24</i>   | <i>Glyma.07G142600</i> | Chr7        | 16975838-16981175        | 570             | 63930.58      | 8.71       | Extracellular;PlasmaMembrane           | 11              | 0          | Y          | n5-16c21/22o         |

|                |                        |       |                   |     |          |      |                                        |    |   |   |                                   |
|----------------|------------------------|-------|-------------------|-----|----------|------|----------------------------------------|----|---|---|-----------------------------------|
| <i>GmLac25</i> | <i>Glyma.07G225300</i> | Chr7  | 40239363-40241517 | 550 | 61539.15 | 9.08 | Extracellular;Lysosomal                | 11 | 0 | Y | n4-15c22/23o                      |
| <i>GmLac26</i> | <i>Glyma.07G225400</i> | Chr7  | 40248750-40251212 | 552 | 61888.46 | 8.96 | Extracellular;Lysosomal                | 11 | 0 | Y | n4-15c23/24o                      |
| <i>GmLac27</i> | <i>Glyma.07G261800</i> | Chr7  | 43671355-43676147 | 547 | 61959.43 | 9.55 | Extracellular;Lysosomal                | 12 | 0 | Y | n10-22c27/28o                     |
| <i>GmLac28</i> | <i>Glyma.08G138900</i> | Chr8  | 10636329-10638034 | 448 | 50654.41 | 8.17 | Extracellular                          | 18 | 1 | 0 | o12-30i<br>n7-18c23/24o47-65i612- |
| <i>GmLac29</i> | <i>Glyma.08G343500</i> | Chr8  | 45872298-45879050 | 637 | 71749.27 | 6.19 | PlasmaMembrane                         | 11 | 2 | Y | 635o                              |
| <i>GmLac30</i> | <i>Glyma.08G353500</i> | Chr8  | 46665729-46668560 | 581 | 64826.14 | 9.93 | PlasmaMembrane                         | 10 | 0 | Y | n11-21c28/29o                     |
| <i>GmLac31</i> | <i>Glyma.08G359100</i> | Chr8  | 47105388-47108727 | 608 | 67156.99 | 8.72 | Extracellular;PlasmaMembrane;Lysosomal |    | 1 | 0 | i37-58o                           |
| <i>GmLac32</i> | <i>Glyma.08G359200</i> | Chr8  | 47112555-47115278 | 519 | 57156.63 | 8.95 | Extracellular                          | 11 | 0 | Y | n10-21c26/27o                     |
| <i>GmLac33</i> | <i>Glyma.08G359300</i> | Chr8  | 47117261-47120794 | 578 | 64121.58 | 9.07 | Extracellular;PlasmaMembrane           | 11 | 0 | Y | n10-21c26/27o                     |
| <i>GmLac34</i> | <i>Glyma.08G359400</i> | Chr8  | 47124368-47126962 | 440 | 48810.27 | 9.14 | PlasmaMembrane                         | 7  | 0 | Y | n2-9c15/16o                       |
| <i>GmLac35</i> | <i>Glyma.09G132400</i> | Chr9  | 33011543-33014363 | 523 | 58489.42 | 5.2  | Extracellular                          |    | 0 | 0 | i                                 |
| <i>GmLac36</i> | <i>Glyma.10G197300</i> | Chr10 | 42857995-42860990 | 600 | 66239.56 | 5.2  | Extracellular                          | 12 | 0 | Y | n12-24c29/30o                     |
| <i>GmLac37</i> | <i>Glyma.10G219100</i> | Chr10 | 45096674-45100122 | 564 | 63296.26 | 8.62 | Extracellular;PlasmaMembrane           | 11 | 0 | Y | n7-18c26/27o                      |
| <i>GmLac38</i> | <i>Glyma.10G219200</i> | Chr10 | 45102350-45106419 | 565 | 63070.66 | 6.34 | Extracellular;PlasmaMembrane;Lysosomal | 13 | 0 | Y | n9-22c26/27o                      |
| <i>GmLac39</i> | <i>Glyma.10G263800</i> | Chr10 | 48805999-48811533 | 575 | 65408.84 | 8.87 | Mitochondrial;Peroxisomal              | 11 | 0 | Y | n6-17c22/23o                      |
| <i>GmLac40</i> | <i>Glyma.11G059200</i> | Chr11 | 4474609-4478620   | 537 | 60246.29 | 8.88 | Lysosomal                              | 11 | 0 | Y | n6-17c21/22o                      |
| <i>GmLac41</i> | <i>Glyma.11G069500</i> | Chr11 | 5231970-5235047   | 564 | 62462.59 | 8.76 | Extracellular;Lysosomal                | 11 | 0 | Y | n13-24c30/31o                     |
| <i>GmLac42</i> | <i>Glyma.11G069600</i> | Chr11 | 5237575-5240089   | 562 | 62447.57 | 8.5  | Extracellular;PlasmaMembrane;Lysosomal | 11 | 0 | Y | n10-21c28/29o                     |
| <i>GmLac43</i> | <i>Glyma.11G097300</i> | Chr11 | 7426344-7431229   | 547 | 61503.03 | 9.36 | Extracellular;Lysosomal                | 11 | 0 | Y | n13-24c31/32o                     |
| <i>GmLac44</i> | <i>Glyma.11G137500</i> | Chr11 | 10456742-10461383 | 586 | 65101.49 | 8.87 | Extracellular;PlasmaMembrane;Lysosomal | 12 | 0 | Y | n11-23c31/32o                     |
| <i>GmLac45</i> | <i>Glyma.11G164000</i> | Chr11 | 15441595-15444592 | 573 | 63472.9  | 9.11 | PlasmaMembrane                         | 11 | 0 | Y | n10-21c29/30o                     |
| <i>GmLac46</i> | <i>Glyma.11G233400</i> | Chr11 | 32873226-32877927 | 587 | 64754.13 | 9.24 | Extracellular                          | 11 | 0 | Y | n16-27c32/33o                     |
| <i>GmLac47</i> | <i>Glyma.11G236800</i> | Chr11 | 33157016-33161441 | 568 | 63124.69 | 5.96 | PlasmaMembrane;Lysosomal               | 11 | 0 | Y | n8-19c23/24o                      |
| <i>GmLac48</i> | <i>Glyma.11G256700</i> | Chr11 | 34639433-34641547 | 552 | 62111.94 | 8.97 | Lysosomal                              | 12 | 0 | Y | n6-18c23/24o                      |
| <i>GmLac49</i> | <i>Glyma.12G023300</i> | Chr12 | 1711347-1715917   | 544 | 61051.54 | 9.46 | Extracellular;Lysosomal                | 11 | 0 | Y | n12-23c28/29o                     |

|                |                        |       |                   |     |          |      |                                        |    |   |   |                      |
|----------------|------------------------|-------|-------------------|-----|----------|------|----------------------------------------|----|---|---|----------------------|
| <i>GmLac50</i> | <i>Glyma.12G060900</i> | Chr12 | 4423650-4427688   | 590 | 65611.01 | 9.02 | Extracellular;PlasmaMembrane;Lysosomal | 11 | 0 | Y | n12-23c31/32o        |
| <i>GmLac51</i> | <i>Glyma.12G097700</i> | Chr12 | 8390539-8395322   | 537 | 60204.81 | 6.83 | Extracellular                          | 11 | 0 | Y | n8-17c22/23o         |
| <i>GmLac52</i> | <i>Glyma.12G121700</i> | Chr12 | 13091668-13095659 | 556 | 61173.8  | 9.34 | Extracellular                          | 11 | 0 | Y | n8-19c23/24o         |
| <i>GmLac53</i> | <i>Glyma.12G192800</i> | Chr12 | 35434955-35439253 | 536 | 59726.15 | 6.86 | Extracellular                          | 11 | 0 | Y | n6-17c22/23o         |
| <i>GmLac54</i> | <i>Glyma.13G033600</i> | Chr13 | 10575983-10578863 | 315 | 34958.38 | 5.7  | Extracellular;PlasmaMembrane           |    | 0 | 0 | i                    |
| <i>GmLac55</i> | <i>Glyma.13G076900</i> | Chr13 | 18197033-18205367 | 576 | 64375.78 | 8.69 | Extracellular;PlasmaMembrane;Lysosomal | 11 | 0 | Y | n8-19c25/26o         |
| <i>GmLac56</i> | <i>Glyma.13G338100</i> | Chr13 | 43086954-43090229 | 458 | 50768.09 | 9.31 | Extracellular                          |    | 0 | 0 | i                    |
| <i>GmLac57</i> | <i>Glyma.14G041300</i> | Chr14 | 3116248-3122893   | 581 | 65292.49 | 8.68 | Extracellular;Lysosomal                | 11 | 0 | Y | n13-24c29/30o        |
| <i>GmLac58</i> | <i>Glyma.14G056100</i> | Chr14 | 4452088-4456161   | 569 | 62633.15 | 6.76 | Extracellular                          | 12 | 0 | Y | n7-19c24/25o         |
| <i>GmLac59</i> | <i>Glyma.14G062300</i> | Chr14 | 5075491-5079469   | 554 | 61347.32 | 7.68 | PlasmaMembrane                         | 11 | 0 | Y | n5-16c21/22o         |
| <i>GmLac60</i> | <i>Glyma.14G191500</i> | Chr14 | 45616466-45620640 | 557 | 61305.75 | 9.45 | Extracellular                          | 11 | 0 | Y | n8-19c23/24o         |
| <i>GmLac61</i> | <i>Glyma.14G198900</i> | Chr14 | 46404283-46407292 | 575 | 63299.47 | 9.04 | PlasmaMembrane                         | 11 | 0 | Y | n13-24c29/30o        |
| <i>GmLac62</i> | <i>Glyma.14G223000</i> | Chr14 | 48811743-48817333 | 547 | 60830.78 | 9.08 | Extracellular                          | 11 | 0 | Y | n9-20c28/29o         |
| <i>GmLac63</i> | <i>Glyma.15G109000</i> | Chr15 | 8563266-8566506   | 456 | 52004.49 | 9.78 | Extracellular;PlasmaMembrane;Lysosomal | 11 | 0 | Y | n3-14c19/20o         |
| <i>GmLac64</i> | <i>Glyma.16G158400</i> | Chr16 | 31863760-31867327 | 566 | 63868.85 | 7.67 | Lysosomal                              | 11 | 0 | Y | n9-20c25/26o         |
| <i>GmLac65</i> | <i>Glyma.17G012300</i> | Chr17 | 950397-955232     | 549 | 62064.49 | 9.46 | Extracellular;Lysosomal                | 11 | 0 | Y | n10-21c29/30o        |
| <i>GmLac66</i> | <i>Glyma.17G138300</i> | Chr17 | 11183728-11188961 | 592 | 66723.58 | 9.28 | Extracellular;PlasmaMembrane           | 13 | 1 | Y | n6-19c24/25o575-591i |
| <i>GmLac67</i> | <i>Glyma.17G180400</i> | Chr17 | 20487778-20491962 | 541 | 60333.25 | 8.48 | Extracellular;Lysosomal                | 11 | 0 | Y | n6-17c25/26o         |
| <i>GmLac68</i> | <i>Glyma.17G180500</i> | Chr17 | 20576340-20582231 | 544 | 60437.9  | 9.22 | Extracellular;PlasmaMembrane;Lysosomal | 11 | 0 | Y | n9-20c24/25o         |
| <i>GmLac69</i> | <i>Glyma.17G261500</i> | Chr17 | 41526584-41534998 | 541 | 59959.72 | 8.83 | Extracellular                          | 11 | 0 | Y | n5-16c21/22o         |
| <i>GmLac70</i> | <i>Glyma.18G023600</i> | Chr18 | 1723409-1728464   | 589 | 64993.37 | 9.32 | Extracellular                          | 13 | 0 | Y | n16-29c34/35o        |
| <i>GmLac71</i> | <i>Glyma.18G057200</i> | Chr18 | 5045036-5048066   | 573 | 63432.79 | 8.94 | Extracellular;PlasmaMembrane           | 11 | 0 | Y | n10-21c29/30o        |
| <i>GmLac72</i> | <i>Glyma.18G065100</i> | Chr18 | 5925631-5930200   | 556 | 61316.06 | 9.41 | Extracellular;Lysosomal                | 11 | 0 | Y | n8-19c23/24o         |
| <i>GmLac73</i> | <i>Glyma.18G177200</i> | Chr18 | 42244982-42247802 | 526 | 58231.06 | 9.5  | Extracellular;PlasmaMembrane;Lysosomal | 11 | 0 | Y | n10-21c26/27o        |
| <i>GmLac74</i> | <i>Glyma.18G177300</i> | Chr18 | 42252244-42255072 | 578 | 63733.22 | 9.24 | Extracellular;Lysosomal                | 11 | 0 | Y | n10-21c26/27o        |
| <i>GmLac75</i> | <i>Glyma.18G177400</i> | Chr18 | 42324003-42327195 | 580 | 63849.25 | 8.76 | Extracellular;Lysosomal                | 11 | 0 | Y | n9-20c28/29o         |

|                |                        |              |                   |     |          |      |                                          |    |   |   |               |
|----------------|------------------------|--------------|-------------------|-----|----------|------|------------------------------------------|----|---|---|---------------|
| <i>GmLac76</i> | <i>Glyma.18G183500</i> | Chr18        | 44265156-44269294 | 576 | 64146.38 | 9.01 | Extracellular;PlasmaMembrane;Lysosomal   | 11 | 0 | Y | n14-25c31/32o |
| <i>GmLac77</i> | <i>Glyma.18G183700</i> | Chr18        | 44276577-44279879 | 584 | 65012.47 | 9.96 | PlasmaMembrane;Mitochondrial;Peroxisomal | 11 | 0 | Y | n14-25c31/32o |
| <i>GmLac78</i> | <i>Glyma.18G193200</i> | Chr18        | 46559987-46565879 | 544 | 59793.03 | 6.33 | Extracellular                            | 11 | 0 | Y | n3-14c22/23o  |
| <i>GmLac79</i> | <i>Glyma.18G193300</i> | Chr18        | 46576771-46581234 | 560 | 62307.96 | 7.02 | Extracellular                            | 11 | 0 | Y | n3-14c22/23o  |
| <i>GmLac80</i> | <i>Glyma.18G193400</i> | Chr18        | 46622868-46628926 | 571 | 64252.92 | 8.59 | Extracellular;Lysosomal                  | 11 | 0 | Y | n5-16c21/22o  |
| <i>GmLac81</i> | <i>Glyma.18G197400</i> | Chr18        | 47370198-47374339 | 533 | 58013.23 | 8.78 | Extracellular                            | 7  | 0 | Y | n8-15c21/22o  |
| <i>GmLac82</i> | <i>Glyma.20G025200</i> | Chr20        | 2743092-2745282   | 557 | 62652.49 | 9.14 | Extracellular;Lysosomal                  | 11 | 0 | Y | n14-25c32/33o |
| <i>GmLac83</i> | <i>Glyma.20G051600</i> | Chr20        | 11622159-11626958 | 442 | 49441.43 | 7.33 | Extracellular                            |    | 0 | 0 | i             |
| <i>GmLac84</i> | <i>Glyma.20G051700</i> | Chr20        | 11685747-11690052 | 574 | 64191.39 | 7.13 | Lysosomal                                | 11 | 0 | Y | n6-17c22/23o  |
| <i>GmLac85</i> | <i>Glyma.20G051900</i> | Chr20        | 11769051-11777145 | 575 | 64133.39 | 8.45 | Extracellular;Lysosomal                  | 11 | 0 | Y | n6-17c22/23o  |
| <i>GmLac86</i> | <i>Glyma.20G126500</i> | Chr20        | 36862931-36869680 | 575 | 65117.41 | 8.77 | Mitochondrial;Peroxisomal                | 11 | 0 | Y | n6-17c22/23o  |
| <i>GmLac87</i> | <i>Glyma.20G172600</i> | Chr20        | 41019363-41023633 | 566 | 63205.74 | 6.41 | Extracellular;PlasmaMembrane;Lysosomal   | 13 | 0 | Y | n9-22c26/27o  |
| <i>GmLac88</i> | <i>Glyma.20G172700</i> | Chr20        | 41025526-41028921 | 565 | 63324.14 | 9.05 | Extracellular;PlasmaMembrane;Lysosomal   | 11 | 0 | Y | n7-18c22/23o  |
| <i>GmLac89</i> | <i>Glyma.20G192800</i> | Chr20        | 43186683-43190491 | 598 | 66247.4  | 4.95 | Extracellular                            | 11 | 0 | Y | n13-24c29/30o |
| <i>GmLac90</i> | <i>Glyma.20G192900</i> | Chr20        | 43192981-43196211 | 603 | 66286.9  | 5.33 | Extracellular;Vacuole                    |    | 1 | 0 | o584-602i/    |
| <i>GmLac91</i> | <i>Glyma.U027300</i>   | scaffold_27  | 174393-178911     | 600 | 67074.41 | 6.79 | Extracellular                            | 11 | 0 | Y | n30-41c49/50o |
| <i>GmLac92</i> | <i>Glyma.U027400</i>   | scaffold_27  | 180254-185442     | 571 | 63410.1  | 6.51 | Extracellular                            | 14 | 0 | Y | n4-18c23/24o  |
| <i>GmLac93</i> | <i>Glyma.U040600</i>   | scaffold_614 | 3780-6730         | 577 | 65273.03 | 7.34 | Extracellular                            | 15 | 0 | Y | n10-25c33/34o |

Note: **Chr** (Chromosome); **AAL** (Amino acids length); **MW** (Molecular weight); **SL** (Subcellular localization); **HRL** (Hydrophobic region Length); **TD** (Transmembrane domain): The numbers indicate how many predicted transmembrane segments; **SP** (Signal peptide): Y/N indicate if a signal peptide was predicted or not; **PREDICTION**: Predicted topology of the protein. The topology is given as the position of the transmembrane helices separated by "i" if the loop is on the cytoplasmic or "o" if it is on the non cytoplasmic side. A signal peptide is given by the position of its h-region separated by a "n" and a "c", and the position of the last amino acid in the signal peptide and the first of the mature protein separated by a "/". Taking *GmLac11* (*Glyma.04G119600*) as an example "1;Y;n4-17c23/24o569-591i": "1" means 1 transmembrane segments are predicted; "Y" means signal peptide was predicted; "n4-17c23/24o569-591i" indicate the protein is predicted to contain a signal peptide with a h-region between position 4 and 17 that is cleaved between position 23 and 24. It is followed by a non cytoplasmic loop and a TM segment between position 569 and 591, which is followed by a cytoplasmic loop.

**Table S2a. Gene numbers in each phylogenetic class in soybean and *Arabidopsis thaliana*.**

|             | Class I | Class II | Class III | Class IV | Class V | Class VI |
|-------------|---------|----------|-----------|----------|---------|----------|
| Arabidopsis | 2       | 4        | 4         | 3        | 3       | 1        |
| Soybean     | 15      | 13       | 8         | 8        | 49      | 0        |

**Table S2b. Specific gene list of each phylogenetic class of *Arabidopsis thaliana*.**

| Class I        | Class II       | Class III      | Class IV       | Class V       | Class VI      |
|----------------|----------------|----------------|----------------|---------------|---------------|
| <i>AtLac2</i>  | <i>AtLac4</i>  | <i>AtLac3</i>  | <i>AtLac6</i>  | <i>AtLac7</i> | <i>AtLac1</i> |
| <i>AtLac17</i> | <i>AtLac10</i> | <i>AtLac5</i>  | <i>AtLac14</i> | <i>AtLac8</i> |               |
|                | <i>AtLac11</i> | <i>AtLac12</i> | <i>AtLac15</i> | <i>AtLac9</i> |               |
|                | <i>AtLac16</i> | <i>AtLac13</i> |                |               |               |

**Table S2c. Specific gene list of each phylogenetic calss of soybean.**

| Class I        | Class II       | Class III      | Class IV       | Class V        | Class VI |
|----------------|----------------|----------------|----------------|----------------|----------|
| <i>GmLac20</i> | <i>GmLac2</i>  | <i>GmLac7</i>  | <i>GmLac18</i> | <i>GmLac1</i>  |          |
| <i>GmLac21</i> | <i>GmLac3</i>  | <i>GmLac8</i>  | <i>GmLac19</i> | <i>GmLac5</i>  |          |
| <i>GmLac30</i> | <i>GmLac4</i>  | <i>GmLac45</i> | <i>GmLac37</i> | <i>GmLac10</i> |          |
| <i>GmLac31</i> | <i>GmLac6</i>  | <i>GmLac46</i> | <i>GmLac38</i> | <i>GmLac11</i> |          |
| <i>GmLac32</i> | <i>GmLac9</i>  | <i>GmLac58</i> | <i>GmLac47</i> | <i>GmLac12</i> |          |
| <i>GmLac33</i> | <i>GmLac15</i> | <i>GmLac61</i> | <i>GmLac64</i> | <i>GmLac13</i> |          |
| <i>GmLac34</i> | <i>GmLac41</i> | <i>GmLac70</i> | <i>GmLac87</i> | <i>GmLac14</i> |          |
| <i>GmLac44</i> | <i>GmLac42</i> | <i>GmLac71</i> | <i>GmLac88</i> | <i>GmLac16</i> |          |
| <i>GmLac50</i> | <i>GmLac52</i> |                |                | <i>GmLac17</i> |          |
| <i>GmLac56</i> | <i>GmLac59</i> |                |                | <i>GmLac22</i> |          |
| <i>GmLac73</i> | <i>GmLac60</i> |                |                | <i>GmLac23</i> |          |
| <i>GmLac74</i> | <i>GmLac72</i> |                |                | <i>GmLac24</i> |          |
| <i>GmLac75</i> | <i>GmLac81</i> |                |                | <i>GmLac25</i> |          |
| <i>GmLac76</i> |                |                |                | <i>GmLac26</i> |          |
| <i>GmLac77</i> |                |                |                | <i>GmLac27</i> |          |
|                |                |                |                | <i>GmLac27</i> |          |
|                |                |                |                | <i>GmLac28</i> |          |
|                |                |                |                | <i>GmLac29</i> |          |
|                |                |                |                | <i>GmLac35</i> |          |
|                |                |                |                | <i>GmLac36</i> |          |
|                |                |                |                | <i>GmLac39</i> |          |
|                |                |                |                | <i>GmLac40</i> |          |
|                |                |                |                | <i>GmLac43</i> |          |
|                |                |                |                | <i>GmLac48</i> |          |
|                |                |                |                | <i>GmLac49</i> |          |
|                |                |                |                | <i>GmLac51</i> |          |
|                |                |                |                | <i>GmLac53</i> |          |

*GmLac54*  
*GmLac55*  
*GmLac57*  
*GmLac62*  
*GmLac63*  
*GmLac65*  
*GmLac65*  
*GmLac66*  
*GmLac67*  
*GmLac68*  
*GmLac68*  
*GmLac69*  
*GmLac78*  
*GmLac79*  
*GmLac80*  
*GmLac82*  
*GmLac83*  
*GmLac84*  
*GmLac85*  
*GmLac86*  
*GmLac89*  
*GmLac90*  
*GmLac91*  
*GmLac92*  
*GmLac93*

---

**Table S3. Collinear gene pairs and their Ka, Ks value and estimated divergence time.**

(Abbreviations marked with an asterisk are explained at the bottom of the table)

| Colinearity pair               | Ka*        | Ks*      | Ka/Ks     | PS* | MYA*        |
|--------------------------------|------------|----------|-----------|-----|-------------|
| <i>GmLac9-GmLac59</i>          | 0.196368   | 3.91685  | 0.0501342 | Yes | 321.0532787 |
| <i>GmLac51-GmLac65</i>         | 0.195282   | 3.88554  | 0.0502586 | Yes | 318.4868852 |
| <i>GmLac20-GmLac44</i>         | 0.181731   | 3.32046  | 0.0547307 | Yes | 272.1688525 |
| <i>GmLac2-GmLac59</i>          | 0.201564   | 3.6351   | 0.0554493 | Yes | 297.9590164 |
| <i>GmLac50-GmLac76</i>         | 0.20168    | 3.32436  | 0.0606671 | Yes | 272.4885246 |
| <i>GmLac20-GmLac50</i>         | 0.185298   | 2.95156  | 0.0627797 | Yes | 241.9311475 |
| <i>GmLac7-GmLac61</i>          | 0.0124896  | 0.198662 | 0.0628684 | Yes | 16.28377049 |
| <i>GmLac44-GmLac76</i>         | 0.197848   | 2.83032  | 0.069903  | Yes | 231.9934426 |
| <i>GmLac8-GmLac58</i>          | 0.00958243 | 0.134479 | 0.0712559 | Yes | 11.02286885 |
| <i>GmLac58-GmLac70</i>         | 0.0657891  | 0.921267 | 0.0714116 | Yes | 75.51368852 |
| <i>GmLac16-GmLac63</i>         | 0.261972   | 3.51285  | 0.0745753 | Yes | 287.9385246 |
| <i>GmLac46-GmLac58</i>         | 0.073337   | 0.982303 | 0.0746583 | Yes | 80.51663934 |
| <i>GmLac6-GmLac60</i>          | 0.0102928  | 0.137023 | 0.0751171 | Yes | 11.23139344 |
| <i>GmLac58-GmLac61</i>         | 0.272414   | 3.29963  | 0.0825591 | Yes | 270.4614754 |
| <i>GmLac8-GmLac70</i>          | 0.0664403  | 0.800032 | 0.083047  | Yes | 65.57639344 |
| <i>GmLac59-GmLac81</i>         | 0.241065   | 2.87585  | 0.0838237 | Yes | 235.7254098 |
| <i>GmLac7-GmLac58</i>          | 0.273713   | 3.24728  | 0.0842901 | Yes | 266.1704918 |
| <i>GmLac8-GmLac46</i>          | 0.0709991  | 0.83205  | 0.0853303 | Yes | 68.20081967 |
| <i>GmLac61-GmLac70</i>         | 0.279239   | 3.22149  | 0.0866801 | Yes | 264.0565574 |
| <i>GmLac7-GmLac70</i>          | 0.278889   | 3.20646  | 0.0869771 | Yes | 262.8245902 |
| <i>GmLac7-GmLac46</i>          | 0.278412   | 3.19783  | 0.0870627 | Yes | 262.1172131 |
| <i>GmLac58-GmLac71</i>         | 0.279712   | 3.19441  | 0.0875631 | Yes | 261.8368852 |
| <i>Glyma.07G146000-GmLac59</i> | 0.2787     | 3.17316  | 0.0878303 | Yes | 260.095082  |
| <i>GmLac46-GmLac61</i>         | 0.280777   | 3.19201  | 0.0879624 | Yes | 261.6401639 |
| <i>GmLac45-GmLac70</i>         | 0.288072   | 3.25489  | 0.0885045 | Yes | 266.7942623 |
| <i>GmLac7-GmLac8</i>           | 0.287432   | 3.2      | 0.0898226 | Yes | 262.295082  |
| <i>GmLac2-GmLac9</i>           | 0.0164114  | 0.17666  | 0.0928982 | Yes | 14.48032787 |
| <i>GmLac70-GmLac71</i>         | 0.295454   | 3.17605  | 0.0930256 | Yes | 260.3319672 |
| <i>GmLac27-GmLac65</i>         | 0.0125557  | 0.134181 | 0.0935728 | Yes | 10.99844262 |
| <i>GmLac16-GmLac51</i>         | 0.0115055  | 0.122695 | 0.0937734 | Yes | 10.05696721 |
| <i>GmLac10-GmLac14</i>         | 0.0113937  | 0.116376 | 0.0979039 | Yes | 9.539016393 |
| <i>GmLac9-GmLac30</i>          | 0.308711   | 3.13059  | 0.0986113 | Yes | 256.6057377 |
| <i>GmLac5-GmLac40</i>          | 0.0118436  | 0.118744 | 0.0997404 | Yes | 9.733114754 |
| <i>GmLac27-GmLac51</i>         | 0.194104   | 1.91728  | 0.101239  | Yes | 157.1540984 |
| <i>GmLac56-GmLac76</i>         | 0.348499   | 3.34306  | 0.104246  | Yes | 274.0213115 |
| <i>GmLac43-GmLac49</i>         | 0.0220598  | 0.210407 | 0.104843  | Yes | 17.24647541 |
| <i>GmLac60-GmLac72</i>         | 0.0609223  | 0.575144 | 0.105925  | Yes | 47.14295082 |
| <i>GmLac14-GmLac69</i>         | 0.0651769  | 0.601309 | 0.108392  | Yes | 49.28762295 |
| <i>GmLac10-GmLac69</i>         | 0.06673    | 0.601017 | 0.111029  | Yes | 49.26368852 |
| <i>GmLac6-GmLac72</i>          | 0.0624787  | 0.547728 | 0.114069  | Yes | 44.8957377  |
| <i>GmLac3-GmLac41</i>          | 0.0714705  | 0.623709 | 0.11459   | Yes | 51.12368852 |

|                                |           |           |          |     |              |
|--------------------------------|-----------|-----------|----------|-----|--------------|
| <i>GmLac25-GmLac82</i>         | 0.0507336 | 0.442396  | 0.114679 | Yes | 36. 26196721 |
| <i>GmLac45-GmLac71</i>         | 0.0129563 | 0.111965  | 0.115718 | Yes | 9. 177459016 |
| <i>GmLac14-GmLac62</i>         | 0.0783131 | 0.674162  | 0.116164 | Yes | 55. 25918033 |
| <i>GmLac20-GmLac56</i>         | 0.365112  | 3.10799   | 0.117475 | Yes | 254. 7532787 |
| <i>GmLac10-GmLac62</i>         | 0.0792715 | 0.662447  | 0.119665 | Yes | 54. 29893443 |
| <i>GmLac51-GmLac63</i>         | 0.270369  | 2.21823   | 0.121885 | Yes | 181. 8221311 |
| <i>GmLac11-GmLac17</i>         | 0.018371  | 0.130036  | 0.141276 | Yes | 10. 65868852 |
| <i>GmLac46-GmLac70</i>         | 0.0282222 | 0.197486  | 0.142907 | Yes | 16. 18737705 |
| <i>GmLac12-GmLac66</i>         | 0.0138972 | 0.0959923 | 0.144775 | Yes | 7. 868221311 |
| <i>GmLac51-GmLac53</i>         | 0.0865494 | 0.585275  | 0.147878 | Yes | 47. 97336066 |
| <i>GmLac20-GmLac76</i>         | 0.0197777 | 0.132608  | 0.149144 | Yes | 10. 8695082  |
| <i>GmLac39-GmLac86</i>         | 0.0349413 | 0.233241  | 0.149808 | Yes | 19. 11811475 |
| <i>GmLac62-GmLac69</i>         | 0.0182972 | 0.119069  | 0.153669 | Yes | 9. 759754098 |
| <i>GmLac7-GmLac45</i>          | 0.0966942 | 0.589913  | 0.163913 | Yes | 48. 35352459 |
| <i>GmLac16-GmLac53</i>         | 0.0884867 | 0.53929   | 0.16408  | Yes | 44. 20409836 |
| <i>GmLac7-GmLac71</i>          | 0.0951587 | 0.570828  | 0.166703 | Yes | 46. 78918033 |
| <i>GmLac1-GmLac22</i>          | 0.249852  | 1.45384   | 0.171856 | Yes | 119. 1672131 |
| <i>GmLac40-GmLac67</i>         | 0.103556  | 0.596757  | 0.173532 | Yes | 48. 9145082  |
| <i>GmLac5-GmLac67</i>          | 0.0993715 | 0.562202  | 0.176754 | Yes | 46. 08213115 |
| <i>GmLac1-GmLac78</i>          | 0.239779  | 1.34105   | 0.178799 | Yes | 109. 9221311 |
| <i>GmLac13-GmLac67</i>         | 0.0315271 | 0.170587  | 0.184815 | Yes | 13. 98254098 |
| <i>GmLac50-GmLac56</i>         | 0.281919  | 1.51079   | 0.186603 | Yes | 123. 8352459 |
| <i>GmLac31-GmLac73</i>         | 0.0884371 | 0.473084  | 0.186937 | Yes | 38. 77737705 |
| <i>GmLac61-GmLac71</i>         | 0.0954206 | 0.505746  | 0.188673 | Yes | 41. 45459016 |
| <i>GmLac55-GmLac83</i>         | 0.0597235 | 0.314047  | 0.190174 | Yes | 25. 74155738 |
| <i>GmLac45-GmLac61</i>         | 0.0971357 | 0.502851  | 0.19317  | Yes | 41. 21729508 |
| <i>GmLac9-GmLac81</i>          | 0.117662  | 0.577507  | 0.203742 | Yes | 47. 33663934 |
| <i>GmLac2-GmLac81</i>          | 0.124407  | 0.601167  | 0.206943 | Yes | 49. 27598361 |
| <i>GmLac13-GmLac40</i>         | 0.109704  | 0.527781  | 0.207859 | Yes | 43. 2607377  |
| <i>GmLac44-GmLac56</i>         | 0.313057  | 1.31851   | 0.237432 | Yes | 108. 0745902 |
| <i>GmLac44-GmLac50</i>         | 0.0256811 | 0.106637  | 0.240828 | Yes | 8. 740737705 |
| <i>GmLac9-Glyma.07G146000</i>  | 0.213896  | 0.837492  | 0.255401 | Yes | 68. 64688525 |
| <i>GmLac2-Glyma.07G146000</i>  | 0.205005  | 0.798374  | 0.256778 | Yes | 65. 4404918  |
| <i>GmLac15-GmLac52</i>         | 0.0385949 | 0.130218  | 0.296387 | Yes | 10. 67360656 |
| <i>GmLac22-GmLac78</i>         | 0.0720579 | 0.241016  | 0.298975 | Yes | 19. 75540984 |
| <i>GmLac27-GmLac63</i>         | 0.175429  | 0.562948  | 0.311626 | Yes | 46. 14327869 |
| <i>GmLac36-GmLac89</i>         | 0.0768827 | 0.243038  | 0.31634  | Yes | 19. 92114754 |
| <i>GmLac63-GmLac65</i>         | 0.175471  | 0.517521  | 0.33906  | Yes | 42. 4197541  |
| <i>Glyma.02G076300-GmLac87</i> | 0.335276  | 0.900699  | 0.37224  | Yes | 73. 82778689 |
| <i>GmLac64-GmLac87</i>         | 0.246166  | 0.649212  | 0.379176 | Yes | 53. 21409836 |
| <i>Glyma.02G076300-GmLac37</i> | 0.348879  | 0.911393  | 0.382797 | Yes | 74. 70434426 |
| <i>Glyma.07G146000-GmLac81</i> | 0.126821  | 0.31457   | 0.403155 | Yes | 25. 78442623 |
| <i>GmLac37-GmLac87</i>         | 0.10082   | 0.249998  | 0.403283 | Yes | 20. 49163934 |
| <i>Glyma.02G076300-GmLac64</i> | 0.177794  | 0.308632  | 0.576071 | Yes | 25. 29770492 |



Note: **Ks** (non-synonymous nucleotide substitution rate); **Ka** (synonymous nucleotide substitution rate); **PS** (Purifying selection); **MYA** (million years ago).

**Table S4. List of Tandem repeat and Segmental repeat laccase genes.** (Abbreviations marked with an asterisk are explained at the bottom of the table)

| <b>Segmental pairs</b>         | <b>SRM*</b>    | <b>TRM*</b>    |
|--------------------------------|----------------|----------------|
| <i>GmLac1—GmLac22</i>          | <i>GmLac1</i>  | <i>GmLac3</i>  |
| <i>GmLac1—GmLac78</i>          | <i>GmLac2</i>  | <i>GmLac4</i>  |
| <i>GmLac2—GmLac9</i>           | <i>GmLac3</i>  | <i>GmLac18</i> |
| <i>GmLac2—Glyma.07G146000</i>  | <i>GmLac5</i>  | <i>GmLac19</i> |
| <i>GmLac2—GmLac59</i>          | <i>GmLac6</i>  | <i>GmLac20</i> |
| <i>GmLac2—GmLac81</i>          | <i>GmLac7</i>  | <i>GmLac21</i> |
| <i>GmLac3—GmLac41</i>          | <i>GmLac8</i>  | <i>GmLac22</i> |
| <i>GmLac5—GmLac40</i>          | <i>GmLac9</i>  | <i>GmLac23</i> |
| <i>GmLac5—GmLac67</i>          | <i>GmLac10</i> | <i>GmLac24</i> |
| <i>Glyma.02G076300—GmLac37</i> | <i>GmLac11</i> | <i>GmLac25</i> |
| <i>Glyma.02G076300—GmLac64</i> | <i>GmLac12</i> | <i>GmLac26</i> |
| <i>Glyma.02G076300—GmLac87</i> | <i>GmLac13</i> | <i>GmLac31</i> |
| <i>GmLac6—GmLac60</i>          | <i>GmLac14</i> | <i>GmLac32</i> |
| <i>GmLac6—GmLac72</i>          | <i>GmLac15</i> | <i>GmLac33</i> |
| <i>GmLac7—GmLac8</i>           | <i>GmLac16</i> | <i>GmLac34</i> |
| <i>GmLac7—GmLac45</i>          | <i>GmLac20</i> | <i>GmLac37</i> |
| <i>GmLac7—GmLac46</i>          | <i>GmLac22</i> | <i>GmLac38</i> |
| <i>GmLac7—GmLac58</i>          | <i>GmLac25</i> | <i>GmLac41</i> |
| <i>GmLac7—GmLac61</i>          | <i>GmLac27</i> | <i>GmLac42</i> |
| <i>GmLac7—GmLac70</i>          | <i>GmLac31</i> | <i>GmLac67</i> |
| <i>GmLac7—GmLac71</i>          | <i>GmLac36</i> | <i>GmLac68</i> |
| <i>GmLac8—GmLac46</i>          | <i>GmLac37</i> | <i>GmLac73</i> |
| <i>GmLac8—GmLac58</i>          | <i>GmLac39</i> | <i>GmLac74</i> |
| <i>GmLac8—GmLac70</i>          | <i>GmLac40</i> | <i>GmLac75</i> |
| <i>GmLac9—Glyma.07G146000</i>  | <i>GmLac43</i> | <i>GmLac76</i> |
| <i>GmLac9—GmLac30</i>          | <i>GmLac44</i> | <i>GmLac77</i> |
| <i>GmLac9—GmLac59</i>          | <i>GmLac45</i> | <i>GmLac78</i> |
| <i>GmLac9—GmLac81</i>          | <i>GmLac46</i> | <i>GmLac79</i> |
| <i>GmLac10—GmLac14</i>         | <i>GmLac50</i> | <i>GmLac80</i> |
| <i>GmLac10—GmLac62</i>         | <i>GmLac51</i> | <i>GmLac83</i> |
| <i>GmLac10—GmLac69</i>         | <i>GmLac55</i> | <i>GmLac84</i> |
| <i>GmLac11—GmLac17</i>         | <i>GmLac56</i> | <i>GmLac85</i> |
| <i>GmLac12—GmLac66</i>         | <i>GmLac58</i> | <i>GmLac87</i> |
| <i>GmLac13—GmLac40</i>         | <i>GmLac59</i> | <i>GmLac88</i> |
| <i>GmLac13—GmLac67</i>         | <i>GmLac60</i> | <i>GmLac89</i> |
| <i>GmLac14—GmLac62</i>         | <i>GmLac61</i> | <i>GmLac90</i> |
| <i>GmLac14—GmLac69</i>         | <i>GmLac62</i> | <i>GmLac91</i> |
| <i>GmLac15—GmLac52</i>         | <i>GmLac63</i> | <i>GmLac92</i> |
| <i>GmLac16—GmLac51</i>         | <i>GmLac64</i> |                |
| <i>GmLac16—GmLac53</i>         | <i>GmLac70</i> |                |

*GmLac16—GmLac63*  
*GmLac20—GmLac44*  
*GmLac20—GmLac50*  
*GmLac20—GmLac56*  
*GmLac20—GmLac76*  
*GmLac22—GmLac78*  
*Glyma.07G146000—GmLac59*  
*Glyma.07G146000—GmLac81*  
*GmLac25—GmLac82*  
*GmLac27—GmLac51*  
*GmLac27—GmLac63*  
*GmLac27—GmLac65*  
*GmLac31—GmLac73*  
*GmLac36—GmLac89*  
*GmLac37—GmLac87*  
*GmLac39—GmLac86*  
*GmLac40—GmLac67*  
*GmLac43—GmLac49*  
*GmLac44—GmLac50*  
*GmLac44—GmLac56*  
*GmLac44—GmLac76*  
*GmLac45—GmLac61*  
*GmLac45—GmLac70*  
*GmLac45—GmLac71*  
*GmLac46—GmLac58*  
*GmLac46—GmLac61*  
*GmLac46—GmLac70*  
*GmLac50—GmLac56*  
*GmLac50—GmLac76*  
*GmLac51—GmLac53*  
*GmLac51—GmLac63*  
*GmLac51—GmLac65*  
*GmLac55—GmLac83*  
*GmLac56—GmLac76*  
*GmLac58—GmLac61*  
*GmLac58—GmLac70*  
*GmLac58—GmLac71*  
*GmLac59—GmLac81*  
*GmLac60—GmLac72*  
*GmLac61—GmLac70*  
*GmLac61—GmLac71*  
*GmLac62—GmLac69*  
*GmLac63—GmLac65*  
*GmLac64—GmLac87*

*Glyma.02G076300*  
*Glyma.07G146000*

*GmLac70—GmLac71*

---

Note: **SRM** (Segmental repeat members) indicated laccase gene family member's involved in segmental duplication; **TRM** (Tandem repeat members) indicate laccase gene family members that show tandem repeat on a chromosome.

**Figure S1.** Schematic diagram of the motifs of soybean laccase proteins.

The schematic diagram was derived from MEME. The order of motifs of laccase proteins in the diagram was automatically generated by MEME according to their score values.

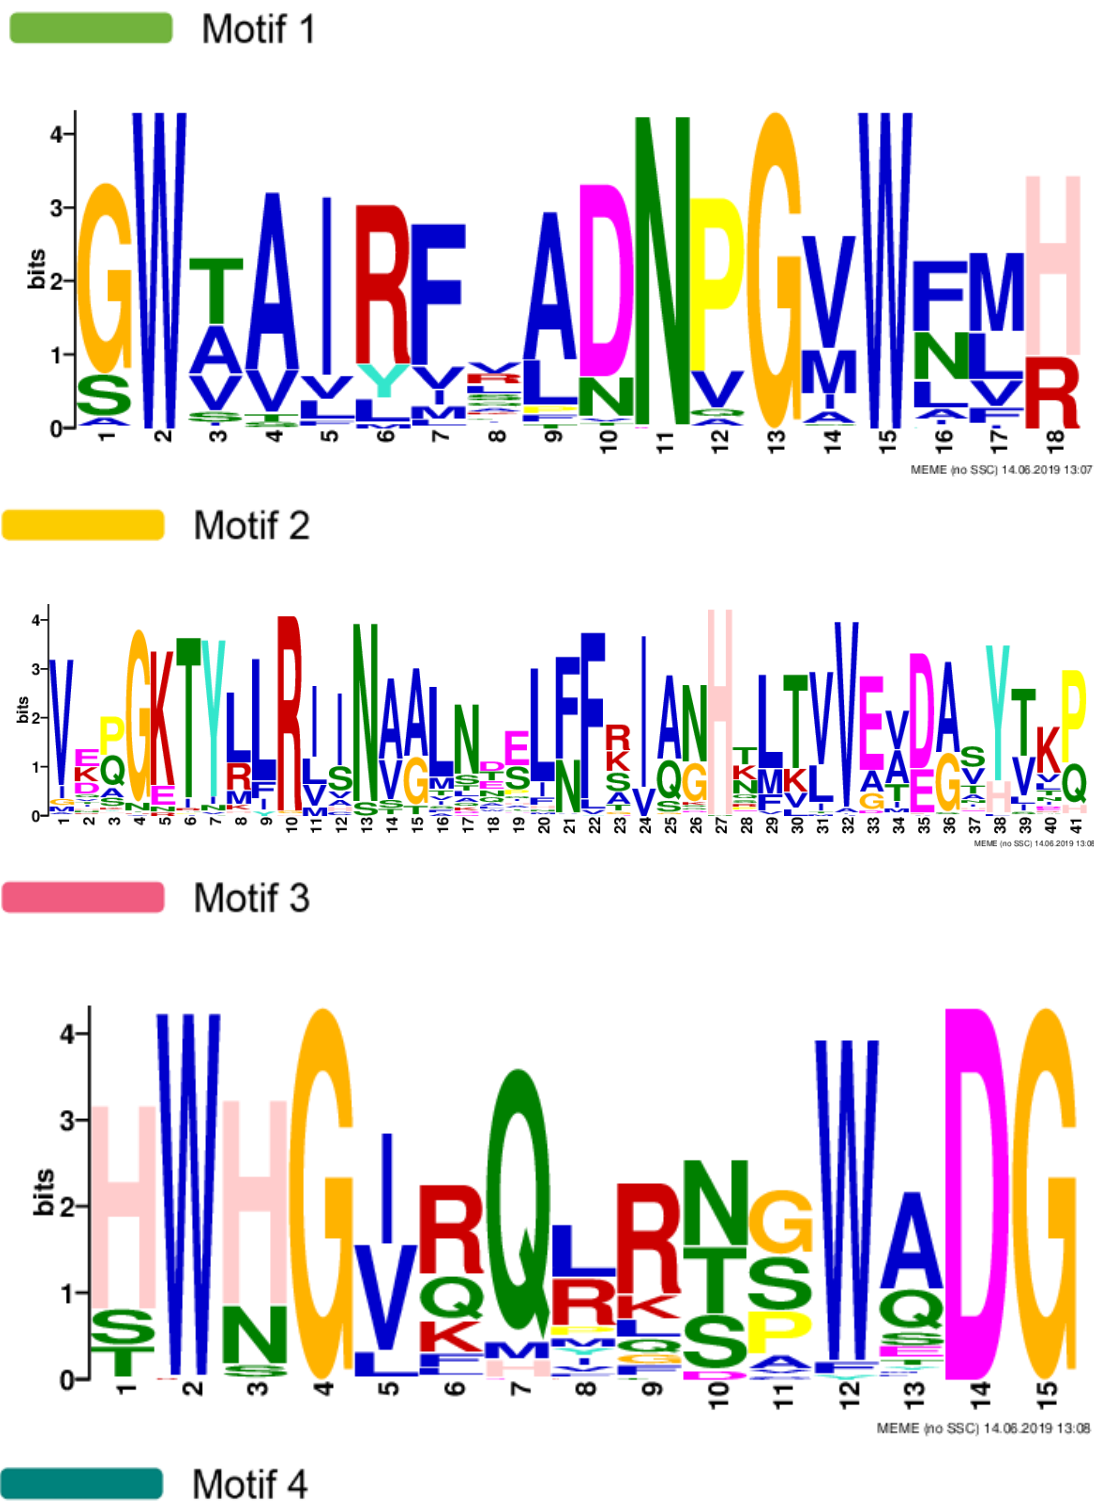

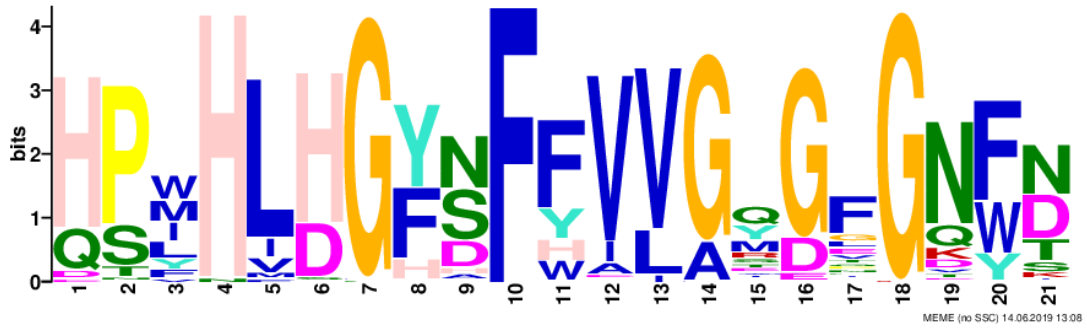

█ Motif 5

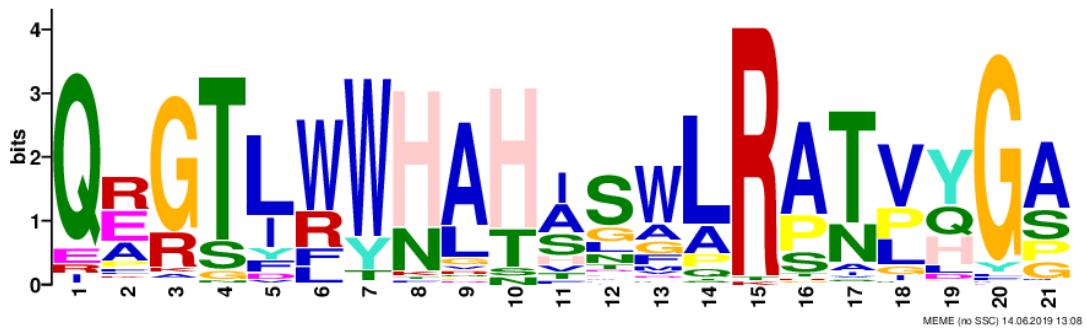

█ Motif 6

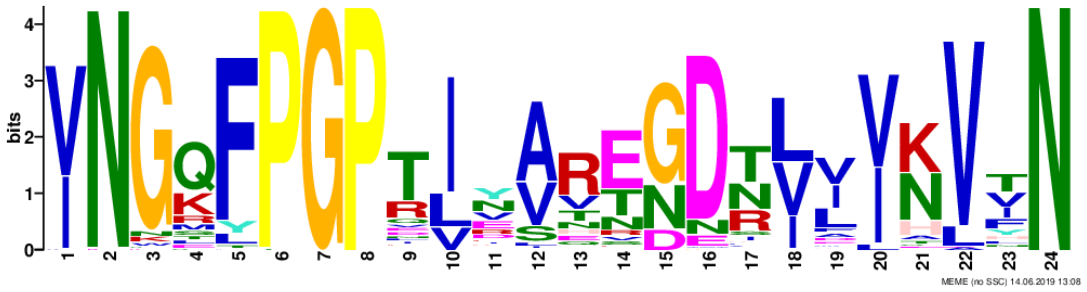

█ Motif 7

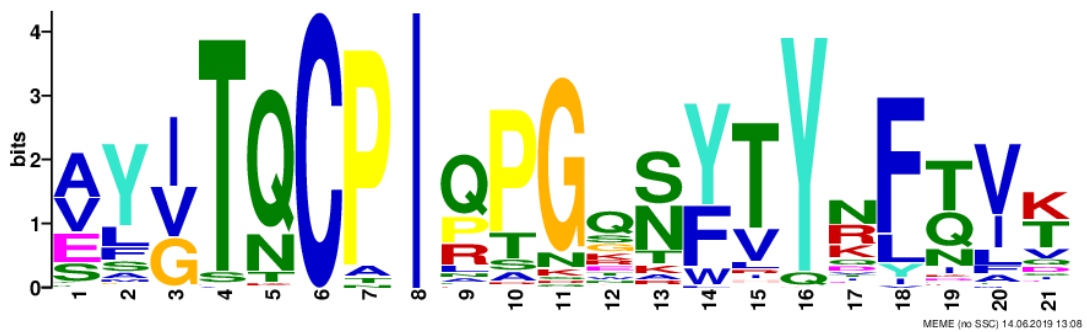

█ Motif 8

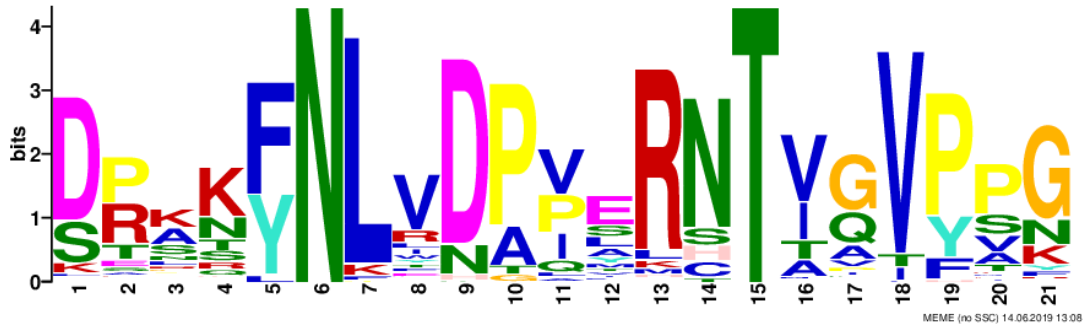

Motif 9

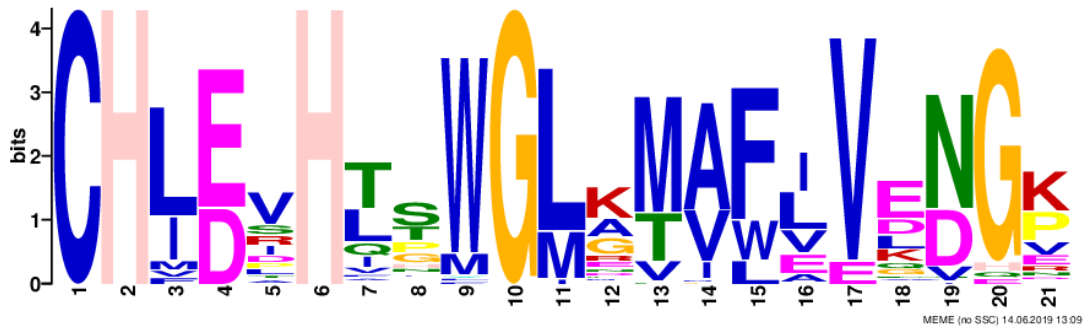

Motif 10

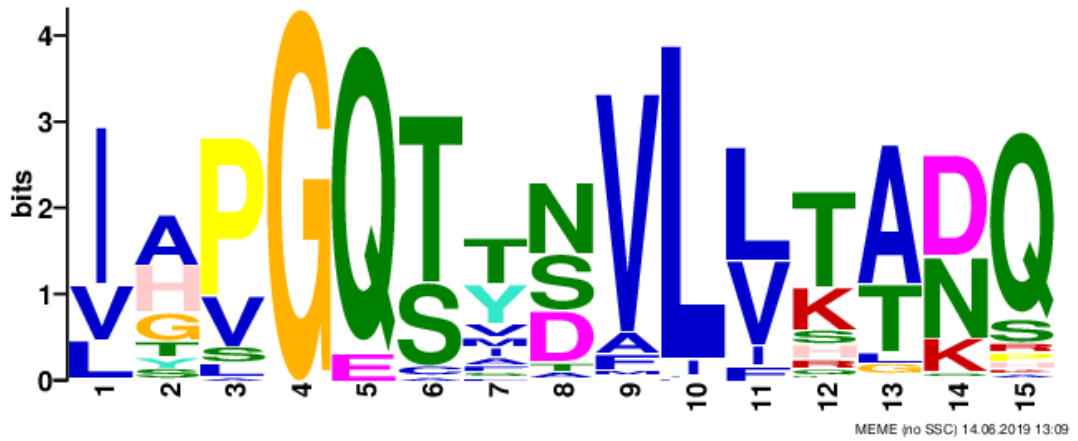

**Table S5a. Expression pattern of soybean laccase gene family.** (Abbreviations marked with an asterisk and expression values are explained at the bottom of the table)

| <b>Gene name</b> | <b>Root</b> | <b>RH*</b> | <b>Nodules</b> | <b>Pod</b> | <b>Seed</b> | <b>Stem</b> | <b>SAM*</b> | <b>Leaves</b> | <b>Flower</b> | <b>MV1*</b> | <b>Scale (value)*</b> |
|------------------|-------------|------------|----------------|------------|-------------|-------------|-------------|---------------|---------------|-------------|-----------------------|
| <i>GmLac1</i>    | 41.64       | 4.94       | 6.82           | 0.06       | 0.00        | 0.04        | 0.01        | 0.03          | 0.14          | 5.96        | 0                     |
| <i>GmLac2</i>    | 0.94        | 6.30       | 12.58          | 10.45      | 0.45        | 70.53       | 3.31        | 5.93          | 1.92          | 12.49       | 5                     |
| <i>GmLac3</i>    | 0.64        | 0.78       | 1.38           | 0.14       | 0.17        | 0.17        | 0.24        | 0.20          | 0.21          | 0.44        | 10                    |
| <i>GmLac4</i>    | 1.33        | 1.20       | 3.37           | 1.41       | 2.90        | 2.27        | 2.20        | 1.62          | 1.68          | 2.00        | 15                    |
| <i>GmLac5</i>    | 29.87       | 66.04      | 33.99          | 37.23      | 14.55       | 46.41       | 24.14       | 2.00          | 6.78          | 29.00       | 20                    |
| <i>GmLac6</i>    | 1.67        | 3.92       | 8.33           | 0.68       | 0.04        | 17.82       | 1.37        | 1.64          | 0.26          | 3.97        | 25                    |
| <i>GmLac7</i>    | 3.43        | 13.10      | 18.70          | 0.08       | 0.15        | 0.39        | 0.16        | 0.02          | 0.34          | 4.04        | 30                    |
| <i>GmLac8</i>    | 2.95        | 4.36       | 3.94           | 7.97       | 0.69        | 32.58       | 0.56        | 0.98          | 1.91          | 6.22        |                       |
| <i>GmLac9</i>    | 1.00        | 7.28       | 15.93          | 10.78      | 0.61        | 75.27       | 3.25        | 5.62          | 2.18          | 13.55       |                       |
| <i>GmLac10</i>   | 11.59       | 44.89      | 11.61          | 73.40      | 111.75      | 53.38       | 23.71       | 2.26          | 11.45         | 38.23       |                       |
| <i>GmLac11</i>   | 8.69        | 4.61       | 5.28           | 7.81       | 14.03       | 6.46        | 5.03        | 2.10          | 0.79          | 6.09        |                       |
| <i>GmLac12</i>   | 54.73       | 65.77      | 60.52          | 23.36      | 22.16       | 47.63       | 55.08       | 6.07          | 5.52          | 37.87       |                       |
| <i>GmLac13</i>   | 0.02        | 0.10       | 0.27           | 0.19       | 0.12        | 2.07        | 0.06        | 0.05          | 0.05          | 0.33        |                       |
| <i>GmLac14</i>   | 9.63        | 30.22      | 10.13          | 10.23      | 16.41       | 32.70       | 10.80       | 0.95          | 3.62          | 13.85       |                       |
| <i>GmLac15</i>   | 0.00        | 0.04       | 0.13           | 0.16       | 0.00        | 0.17        | 0.02        | 0.04          | 0.07          | 0.07        |                       |
| <i>GmLac16</i>   | 36.50       | 49.47      | 10.29          | 129.80     | 4.81        | 99.05       | 114.40      | 14.28         | 18.43         | 53.00       |                       |
| <i>GmLac17</i>   | 3.59        | 2.72       | 3.28           | 3.18       | 5.06        | 3.80        | 2.48        | 0.75          | 1.27          | 2.90        |                       |
| <i>GmLac18</i>   | 0.09        | 0.69       | 0.14           | 0.11       | 2.53        | 0.09        | 3.88        | 0.00          | 0.09          | 0.85        |                       |
| <i>GmLac19</i>   | 0.11        | 0.51       | 0.10           | 0.54       | 0.51        | 1.01        | 0.73        | 0.55          | 0.04          | 0.46        |                       |
| <i>GmLac20</i>   | 0.06        | 4.26       | 5.34           | 18.08      | 0.01        | 66.65       | 0.08        | 0.64          | 0.12          | 10.58       |                       |
| <i>GmLac21</i>   | 0.57        | 3.16       | 4.30           | 54.10      | 0.12        | 36.46       | 0.64        | 2.81          | 0.56          | 11.41       |                       |
| <i>GmLac22</i>   | 0.43        | 0.97       | 3.16           | 0.30       | 0.04        | 5.16        | 0.52        | 1.21          | 0.17          | 1.33        |                       |
| <i>GmLac23</i>   | 0.02        | 0.00       | 0.00           | 5.35       | 6.87        | 0.00        | 0.04        | 0.01          | 0.52          | 1.42        |                       |



|                |       |       |       |        |       |       |       |       |        |       |
|----------------|-------|-------|-------|--------|-------|-------|-------|-------|--------|-------|
| <i>GmLac24</i> | 38.53 | 11.66 | 21.13 | 0.08   | 0.00  | 0.03  | 0.09  | 2.86  | 0.21   | 8.29  |
| <i>GmLac25</i> | 0.20  | 0.00  | 0.00  | 0.01   | 0.00  | 1.06  | 0.20  | 0.03  | 505.03 | 56.28 |
| <i>GmLac26</i> | 0.00  | 0.00  | 0.00  | 0.00   | 0.00  | 0.06  | 0.00  | 0.00  | 22.85  | 2.54  |
| <i>GmLac27</i> | 13.26 | 23.59 | 7.66  | 8.59   | 6.77  | 3.95  | 17.17 | 0.41  | 1.85   | 9.25  |
| <i>GmLac28</i> | 0.00  | 0.16  | 1.40  | 0.00   | 0.00  | 0.00  | 0.00  | 0.03  | 0.00   | 0.18  |
| <i>GmLac29</i> | 4.53  | 8.33  | 6.05  | 11.75  | 10.70 | 13.51 | 13.12 | 3.33  | 3.38   | 8.30  |
| <i>GmLac30</i> | 0.00  | 0.01  | 0.00  | 0.01   | 0.00  | 0.02  | 0.10  | 0.00  | 0.02   | 0.02  |
| <i>GmLac31</i> | 0.91  | 3.45  | 6.42  | 3.37   | 0.01  | 15.23 | 4.51  | 1.76  | 1.10   | 4.08  |
| <i>GmLac32</i> | 0.00  | 0.06  | 0.03  | 1.92   | 0.03  | 0.40  | 0.00  | 0.05  | 0.03   | 0.28  |
| <i>GmLac33</i> | 0.53  | 0.70  | 0.66  | 0.78   | 0.56  | 3.97  | 0.51  | 0.39  | 0.26   | 0.93  |
| <i>GmLac34</i> | 0.00  | 0.04  | 0.01  | 0.02   | 0.04  | 0.03  | 0.04  | 0.00  | 0.00   | 0.02  |
| <i>GmLac35</i> | 0.03  | 0.00  | 0.00  | 0.00   | 0.00  | 0.01  | 0.00  | 0.00  | 0.01   | 0.01  |
| <i>GmLac36</i> | 0.00  | 0.00  | 0.04  | 0.02   | 0.00  | 0.02  | 0.00  | 0.00  | 0.09   | 0.02  |
| <i>GmLac37</i> | 3.78  | 0.02  | 0.04  | 0.11   | 7.01  | 0.79  | 23.46 | 0.12  | 0.79   | 4.01  |
| <i>GmLac38</i> | 0.20  | 0.00  | 0.00  | 0.09   | 0.18  | 0.13  | 4.43  | 0.00  | 0.35   | 0.60  |
| <i>GmLac39</i> | 0.76  | 2.29  | 0.92  | 8.24   | 4.87  | 3.74  | 3.60  | 11.39 | 3.14   | 4.33  |
| <i>GmLac40</i> | 33.53 | 59.28 | 40.51 | 33.92  | 10.26 | 87.08 | 43.94 | 6.10  | 9.01   | 35.96 |
| <i>GmLac41</i> | 0.63  | 0.98  | 3.94  | 0.93   | 0.58  | 1.83  | 1.53  | 1.66  | 0.90   | 1.44  |
| <i>GmLac42</i> | 1.56  | 2.07  | 6.79  | 1.25   | 0.04  | 0.76  | 0.26  | 0.19  | 0.31   | 1.47  |
| <i>GmLac43</i> | 3.11  | 2.62  | 1.38  | 2.35   | 3.16  | 5.41  | 0.85  | 2.11  | 3.56   | 2.73  |
| <i>GmLac44</i> | 0.05  | 0.18  | 0.39  | 219.15 | 0.01  | 0.31  | 0.07  | 0.16  | 2.36   | 24.74 |
| <i>GmLac45</i> | 0.70  | 0.05  | 0.03  | 6.21   | 0.04  | 1.64  | 16.02 | 0.00  | 0.82   | 2.84  |
| <i>GmLac46</i> | 3.38  | 3.71  | 3.93  | 71.19  | 0.07  | 42.16 | 0.87  | 5.17  | 1.15   | 14.63 |
| <i>GmLac47</i> | 0.02  | 0.01  | 0.05  | 0.74   | 2.75  | 0.00  | 0.01  | 0.00  | 0.01   | 0.40  |
| <i>GmLac48</i> | 0.00  | 0.02  | 0.03  | 0.01   | 0.01  | 0.01  | 0.00  | 0.00  | 0.73   | 0.09  |
| <i>GmLac49</i> | 5.96  | 1.85  | 2.96  | 0.42   | 0.22  | 1.84  | 0.46  | 0.66  | 1.47   | 1.76  |

|                |        |        |       |        |        |        |       |       |       |       |
|----------------|--------|--------|-------|--------|--------|--------|-------|-------|-------|-------|
| <i>GmLac50</i> | 0.25   | 2.16   | 3.29  | 45.74  | 0.20   | 6.87   | 0.42  | 1.29  | 0.74  | 6.77  |
| <i>GmLac51</i> | 14.63  | 19.92  | 7.13  | 60.15  | 3.77   | 61.18  | 61.51 | 7.11  | 12.99 | 27.60 |
| <i>GmLac52</i> | 0.18   | 0.59   | 0.63  | 4.39   | 0.46   | 1.15   | 0.01  | 0.23  | 0.10  | 0.86  |
| <i>GmLac53</i> | 3.08   | 7.99   | 5.15  | 2.43   | 2.66   | 2.09   | 1.86  | 0.21  | 0.63  | 2.90  |
| <i>GmLac54</i> | 0.01   | 0.00   | 0.00  | 0.00   | 0.03   | 0.02   | 0.00  | 0.00  | 0.10  | 0.02  |
| <i>GmLac55</i> | 162.50 | 50.75  | 30.23 | 12.38  | 3.09   | 36.75  | 8.77  | 12.19 | 4.63  | 35.70 |
| <i>GmLac56</i> | 0.00   | 0.00   | 0.00  | 1.37   | 0.00   | 0.00   | 0.21  | 0.00  | 0.02  | 0.18  |
| <i>GmLac57</i> | 0.19   | 0.00   | 0.00  | 0.21   | 0.90   | 0.02   | 17.93 | 0.28  | 2.90  | 2.49  |
| <i>GmLac58</i> | 0.74   | 7.17   | 7.19  | 7.00   | 0.08   | 66.23  | 1.79  | 0.23  | 0.70  | 10.12 |
| <i>GmLac59</i> | 0.44   | 3.74   | 9.64  | 15.62  | 0.01   | 40.78  | 1.54  | 5.87  | 1.01  | 8.74  |
| <i>GmLac60</i> | 1.90   | 3.53   | 8.79  | 0.98   | 0.03   | 5.67   | 0.55  | 1.62  | 0.30  | 2.60  |
| <i>GmLac61</i> | 1.33   | 8.78   | 14.21 | 0.55   | 0.11   | 0.90   | 0.08  | 0.16  | 1.45  | 3.06  |
| <i>GmLac62</i> | 27.32  | 53.26  | 32.22 | 21.12  | 15.68  | 33.04  | 8.42  | 1.00  | 2.10  | 21.57 |
| <i>GmLac63</i> | 0.00   | 0.00   | 0.00  | 0.00   | 0.00   | 0.02   | 0.02  | 0.00  | 0.04  | 0.01  |
| <i>GmLac64</i> | 1.08   | 0.38   | 1.11  | 29.43  | 220.49 | 0.42   | 0.68  | 0.27  | 0.65  | 28.28 |
| <i>GmLac65</i> | 69.51  | 127.58 | 54.73 | 26.11  | 33.73  | 26.31  | 62.91 | 1.39  | 4.16  | 45.16 |
| <i>GmLac66</i> | 66.83  | 56.05  | 48.36 | 56.52  | 35.88  | 84.13  | 43.27 | 8.40  | 9.79  | 45.47 |
| <i>GmLac67</i> | 6.64   | 15.71  | 22.65 | 33.72  | 1.07   | 206.44 | 32.88 | 0.43  | 5.14  | 36.08 |
| <i>GmLac68</i> | 64.91  | 47.40  | 37.21 | 0.05   | 0.02   | 0.03   | 0.01  | 0.00  | 0.03  | 16.63 |
| <i>GmLac69</i> | 47.09  | 65.88  | 29.72 | 2.73   | 0.36   | 28.53  | 16.04 | 3.85  | 4.14  | 22.04 |
| <i>GmLac70</i> | 2.02   | 5.15   | 3.85  | 131.31 | 0.02   | 31.12  | 0.37  | 2.15  | 1.16  | 19.68 |
| <i>GmLac71</i> | 0.26   | 0.02   | 0.00  | 1.05   | 0.00   | 0.90   | 11.92 | 0.00  | 0.21  | 1.59  |
| <i>GmLac72</i> | 0.59   | 1.08   | 1.32  | 0.15   | 0.06   | 10.85  | 1.10  | 1.00  | 0.29  | 1.83  |
| <i>GmLac73</i> | 0.16   | 0.37   | 0.78  | 1.51   | 0.07   | 3.05   | 0.41  | 0.07  | 0.08  | 0.72  |
| <i>GmLac74</i> | 0.17   | 0.68   | 1.18  | 2.78   | 0.14   | 4.58   | 0.81  | 0.21  | 0.18  | 1.19  |
| <i>GmLac75</i> | 0.07   | 0.19   | 0.09  | 0.32   | 0.00   | 0.26   | 1.14  | 0.36  | 0.17  | 0.29  |

|                |        |       |       |       |       |       |        |       |       |       |
|----------------|--------|-------|-------|-------|-------|-------|--------|-------|-------|-------|
| <i>GmLac76</i> | 0.00   | 1.32  | 1.54  | 2.35  | 0.00  | 20.37 | 0.01   | 0.14  | 0.03  | 2.86  |
| <i>GmLac77</i> | 0.16   | 1.65  | 2.13  | 35.66 | 0.05  | 16.90 | 0.30   | 1.16  | 0.32  | 6.48  |
| <i>GmLac78</i> | 0.10   | 0.02  | 0.08  | 0.00  | 0.02  | 0.00  | 0.00   | 0.00  | 0.00  | 0.02  |
| <i>GmLac79</i> | 0.13   | 0.01  | 0.00  | 0.07  | 0.09  | 0.00  | 0.04   | 0.04  | 0.14  | 0.06  |
| <i>GmLac80</i> | 347.87 | 16.01 | 30.92 | 0.31  | 0.00  | 0.11  | 0.00   | 9.05  | 0.70  | 45.00 |
| <i>GmLac81</i> | 0.06   | 0.48  | 1.09  | 8.98  | 0.00  | 10.15 | 0.05   | 0.05  | 0.22  | 2.34  |
| <i>GmLac82</i> | 0.00   | 0.00  | 0.00  | 0.00  | 0.00  | 0.02  | 0.00   | 0.00  | 19.59 | 2.18  |
| <i>GmLac83</i> | 0.03   | 0.19  | 0.47  | 0.06  | 0.09  | 0.08  | 0.00   | 0.02  | 0.27  | 0.14  |
| <i>GmLac84</i> | 23.66  | 2.72  | 2.76  | 0.15  | 0.09  | 1.48  | 0.06   | 0.14  | 0.33  | 3.49  |
| <i>GmLac85</i> | 93.65  | 67.15 | 30.28 | 32.47 | 44.21 | 48.51 | 13.49  | 12.04 | 2.55  | 38.26 |
| <i>GmLac86</i> | 1.25   | 5.09  | 6.20  | 10.36 | 17.20 | 28.81 | 6.63   | 23.16 | 10.68 | 12.15 |
| <i>GmLac87</i> | 13.60  | 0.03  | 0.00  | 0.00  | 0.01  | 2.87  | 117.91 | 0.00  | 2.54  | 15.22 |
| <i>GmLac88</i> | 1.57   | 0.00  | 0.00  | 0.00  | 0.00  | 0.29  | 12.32  | 0.00  | 0.09  | 1.59  |
| <i>GmLac89</i> | 4.44   | 0.28  | 0.10  | 0.04  | 0.05  | 0.09  | 0.04   | 0.00  | 2.18  | 0.80  |
| <i>GmLac90</i> | 0.02   | 0.06  | 0.27  | 0.02  | 0.00  | 0.00  | 0.12   | 0.00  | 0.11  | 0.07  |
| MV2*           | 14.22  | 11.22 | 7.99  | 14.61 | 7.02  | 17.39 | 9.00   | 2.00  | 7.90  | 10.15 |

Note: **RH** (Root hairs); **SAM** (Stem apical meristem); **MV1** (Mean value1) indicate the average expression value of a gene in nine tissues/organs; **MV2** (Mean value 2) indicate the average expression value of 90 laccase genes in a one tissue/organ; **Scale (value)** a scale used to indicate different expression abundance, use light to dark red represent different expression abundance; Expression values are based **FPKM** (Fragments per Kilobase Million). We define 3-fold of average value (10.15) of 90 genes in 9 tissues/organs as high expression gene.

**Table S5b. Genes that are barely expressed in 9 detectet materials.**

| <b>Gene name</b> | <b>Root</b> | <b>RH</b> | <b>Nodules</b> | <b>Pod</b> | <b>Seed</b> | <b>Stem</b> | <b>SAM</b> | <b>Leaves</b> | <b>Flower</b> |
|------------------|-------------|-----------|----------------|------------|-------------|-------------|------------|---------------|---------------|
| GmLac34          | 0.00        | 0.04      | 0.01           | 0.02       | 0.04        | 0.03        | 0.04       | 0.00          | 0.00          |
| GmLac35          | 0.03        | 0.00      | 0.00           | 0.00       | 0.00        | 0.01        | 0.00       | 0.00          | 0.01          |
| GmLac36          | 0.00        | 0.00      | 0.04           | 0.02       | 0.00        | 0.02        | 0.00       | 0.00          | 0.09          |
| GmLac48          | 0.00        | 0.02      | 0.03           | 0.01       | 0.01        | 0.01        | 0.00       | 0.00          | 0.73          |
| GmLac54          | 0.01        | 0.00      | 0.00           | 0.00       | 0.03        | 0.02        | 0.00       | 0.00          | 0.10          |
| GmLac63          | 0.00        | 0.00      | 0.00           | 0.00       | 0.00        | 0.02        | 0.02       | 0.00          | 0.04          |
| GmLac78          | 0.10        | 0.02      | 0.08           | 0.00       | 0.02        | 0.00        | 0.00       | 0.00          | 0.00          |
| GmLac79          | 0.13        | 0.01      | 0.00           | 0.07       | 0.09        | 0.00        | 0.04       | 0.04          | 0.14          |
| GmLac83          | 0.03        | 0.19      | 0.47           | 0.06       | 0.09        | 0.08        | 0.00       | 0.02          | 0.27          |
| GmLac90          | 0.02        | 0.06      | 0.27           | 0.02       | 0.00        | 0.00        | 0.12       | 0.00          | 0.11          |

Note: Refer to Additional file 6 (sheet 1).

**Table S6. Comparison of expression patterns between colinearity pairs.** (Abbreviation explanation refer to Additional file 6, other declares listed at the bottom of the table)

| Colinearity pairs           | Gene name                                | Root            | RH*             | Nodules         | Pod              | Seed             | Stem            | SAM*            | Leaves          | Flower          |
|-----------------------------|------------------------------------------|-----------------|-----------------|-----------------|------------------|------------------|-----------------|-----------------|-----------------|-----------------|
| Glyma.02G076300-<br>GmLac37 | <i>Glyma.02G076300</i><br><i>GmLac37</i> | #N/A<br>3.77682 | #N/A<br>0.02212 | #N/A<br>0.03889 | #N/A<br>0.105609 | #N/A<br>7.01387  | #N/A<br>0.79394 | #N/A<br>23.4562 | #N/A<br>0.11764 | #N/A<br>0.7901  |
| Glyma.02G076300-<br>GmLac64 | <i>Glyma.02G076300</i><br><i>GmLac64</i> | #N/A<br>1.07807 | #N/A<br>0.38154 | #N/A<br>1.11208 | #N/A<br>29.4318  | #N/A<br>220.487  | #N/A<br>0.42315 | #N/A<br>0.67943 | #N/A<br>0.27023 | #N/A<br>0.65259 |
| Glyma.02G076300-<br>GmLac87 | <i>Glyma.02G076300</i><br><i>GmLac87</i> | #N/A<br>13.599  | #N/A<br>0.02908 | #N/A<br>0       | #N/A<br>0        | #N/A<br>0.009975 | #N/A<br>2.87219 | #N/A<br>117.911 | #N/A<br>0       | #N/A<br>2.53511 |
| Glyma.07G146000-<br>GmLac59 | <i>Glyma.07G146000</i><br><i>GmLac59</i> | #N/A<br>0.43981 | #N/A<br>3.74448 | #N/A<br>9.644   | #N/A<br>15.6223  | #N/A<br>0.009872 | #N/A<br>40.7784 | #N/A<br>1.54436 | #N/A<br>5.86649 | #N/A<br>1.01082 |
| Glyma.07G146000-<br>GmLac81 | <i>Glyma.07G146000</i><br><i>GmLac81</i> | #N/A<br>0.05663 | #N/A<br>0.48416 | #N/A<br>1.08664 | #N/A<br>8.97794  | #N/A<br>0        | #N/A<br>10.1503 | #N/A<br>0.04955 | #N/A<br>0.05114 | #N/A<br>0.22449 |
| GmLac10-GmLac14             | <i>GmLac10</i>                           | 11.5899         | 44.8886         | 11.6101         | 73.4047          | 111.748          | 53.3777         | 23.7094         | 2.26299         | 11.447          |
|                             | <i>GmLac14</i>                           | 9.63394         | 30.2187         | 10.13           | 10.2349          | 16.4061          | 32.6984         | 10.7951         | 0.94599         | 3.6231          |
| GmLac10-GmLac62             | <i>GmLac10</i>                           | 11.5899         | 44.8886         | 11.6101         | 73.4047          | 111.748          | 53.3777         | 23.7094         | 2.26299         | 11.447          |
|                             | <i>GmLac62</i>                           | 27.3235         | 53.2608         | 32.2232         | 21.1231          | 15.6818          | 33.0403         | 8.41675         | 0.99737         | 2.09606         |
| GmLac10-GmLac69             | <i>GmLac10</i>                           | 11.5899         | 44.8886         | 11.6101         | 73.4047          | 111.748          | 53.3777         | 23.7094         | 2.26299         | 11.447          |
|                             | <i>GmLac69</i>                           | 47.0863         | 65.8791         | 29.7196         | 2.73122          | 0.358669         | 28.528          | 16.0405         | 3.84799         | 4.1437          |
| GmLac11-GmLac17             | <i>GmLac11</i>                           | 8.68507         | 4.6075          | 5.27789         | 7.81244          | 14.0267          | 6.45699         | 5.03375         | 2.10009         | 0.78851         |
|                             | <i>GmLac17</i>                           | 3.58944         | 2.71941         | 3.28167         | 3.1781           | 5.06165          | 3.79891         | 2.47571         | 0.75273         | 1.2702          |
| GmLac12-GmLac66             | <i>GmLac12</i>                           | 54.7267         | 65.7731         | 60.5153         | 23.3617          | 22.164           | 47.6317         | 55.0847         | 6.0687          | 5.52321         |
|                             | <i>GmLac66</i>                           | 66.8345         | 56.0486         | 48.3648         | 56.5199          | 35.877           | 84.13           | 43.2721         | 8.3978          | 9.78837         |
| GmLac13-GmLac40             | <i>GmLac13</i>                           | 0.02002         | 0.10168         | 0.27329         | 0.189668         | 0.123885         | 2.06787         | 0.06217         | 0.05427         | 0.05264         |
|                             | <i>GmLac40</i>                           | 33.5331         | 59.2758         | 40.5081         | 33.9158          | 10.2627          | 87.0806         | 43.9428         | 6.09931         | 9.00949         |
| GmLac13-GmLac67             | <i>GmLac13</i>                           | 0.02002         | 0.10168         | 0.27329         | 0.189668         | 0.123885         | 2.06787         | 0.06217         | 0.05427         | 0.05264         |

|                 |                |         |         |         |          |          |         |         |         |         |  |
|-----------------|----------------|---------|---------|---------|----------|----------|---------|---------|---------|---------|--|
|                 | <i>GmLac67</i> | 6.64409 | 15.7084 | 22.6459 | 33.7204  | 1.0697   | 206.436 | 32.8812 | 0.42912 | 5.14144 |  |
| GmLac14-GmLac62 | <i>GmLac14</i> | 9.63394 | 30.2187 | 10.13   | 10.2349  | 16.4061  | 32.6984 | 10.7951 | 0.94599 | 3.6231  |  |
|                 | <i>GmLac62</i> | 27.3235 | 53.2608 | 32.2232 | 21.1231  | 15.6818  | 33.0403 | 8.41675 | 0.99737 | 2.09606 |  |
| GmLac14-GmLac69 | <i>GmLac14</i> | 9.63394 | 30.2187 | 10.13   | 10.2349  | 16.4061  | 32.6984 | 10.7951 | 0.94599 | 3.6231  |  |
|                 | <i>GmLac69</i> | 47.0863 | 65.8791 | 29.7196 | 2.73122  | 0.358669 | 28.528  | 16.0405 | 3.84799 | 4.1437  |  |
| GmLac15-GmLac52 | <i>GmLac15</i> | 0       | 0.03701 | 0.12832 | 0.163823 | 0        | 0.16703 | 0.02097 | 0.04407 | 0.06766 |  |
|                 | <i>GmLac52</i> | 0.18233 | 0.58785 | 0.62554 | 4.38931  | 0.458937 | 1.15019 | 0.01074 | 0.23023 | 0.10126 |  |
| GmLac16-GmLac51 | <i>GmLac16</i> | 36.498  | 49.4705 | 10.2934 | 129.799  | 4.80801  | 99.0501 | 114.403 | 14.2751 | 18.4324 |  |
|                 | <i>GmLac51</i> | 14.6344 | 19.9245 | 7.12984 | 60.1506  | 3.77382  | 61.1832 | 61.508  | 7.11307 | 12.9894 |  |
| GmLac16-GmLac53 | <i>GmLac16</i> | 36.498  | 49.4705 | 10.2934 | 129.799  | 4.80801  | 99.0501 | 114.403 | 14.2751 | 18.4324 |  |
|                 | <i>GmLac53</i> | 3.07529 | 7.9933  | 5.14657 | 2.42602  | 2.65726  | 2.08877 | 1.85632 | 0.21466 | 0.62825 |  |
| GmLac16-GmLac63 | <i>GmLac16</i> | 36.498  | 49.4705 | 10.2934 | 129.799  | 4.80801  | 99.0501 | 114.403 | 14.2751 | 18.4324 |  |
|                 | <i>GmLac63</i> | 0       | 0       | 0       | 0        | 0        | 0.0168  | 0.01694 | 0       | 0.04252 |  |
| GmLac1-GmLac22  | <i>GmLac1</i>  | 41.6351 | 4.94473 | 6.82357 | 0.061812 | 0        | 0.03739 | 0.01244 | 0.02541 | 0.13736 |  |
|                 | <i>GmLac22</i> | 0.43127 | 0.96933 | 3.16485 | 0.303696 | 0.040318 | 5.16388 | 0.51652 | 1.211   | 0.17482 |  |
| GmLac1-GmLac78  | <i>GmLac1</i>  | 41.6351 | 4.94473 | 6.82357 | 0.061812 | 0        | 0.03739 | 0.01244 | 0.02541 | 0.13736 |  |
|                 | <i>GmLac78</i> | 0.09805 | 0.02228 | 0.07835 | 0        | 0.022626 | 0       | 0       | 0       | 0       |  |
| GmLac20-GmLac44 | <i>GmLac20</i> | 0.05868 | 4.25552 | 5.33585 | 18.0807  | 0.009057 | 66.646  | 0.0836  | 0.63572 | 0.12106 |  |
|                 | <i>GmLac44</i> | 0.04611 | 0.18383 | 0.39179 | 219.151  | 0.009614 | 0.30732 | 0.07063 | 0.15598 | 2.35643 |  |
| GmLac20-GmLac50 | <i>GmLac20</i> | 0.05868 | 4.25552 | 5.33585 | 18.0807  | 0.009057 | 66.646  | 0.0836  | 0.63572 | 0.12106 |  |
|                 | <i>GmLac50</i> | 0.2465  | 2.16443 | 3.28555 | 45.742   | 0.19514  | 6.86754 | 0.41932 | 1.29423 | 0.74085 |  |
| GmLac20-GmLac56 | <i>GmLac20</i> | 0.05868 | 4.25552 | 5.33585 | 18.0807  | 0.009057 | 66.646  | 0.0836  | 0.63572 | 0.12106 |  |
|                 | <i>GmLac56</i> | 0       | 0       | 0       | 1.37444  | 0        | 0       | 0.20844 | 0       | 0.02231 |  |
| GmLac20-GmLac76 | <i>GmLac20</i> | 0.05868 | 4.25552 | 5.33585 | 18.0807  | 0.009057 | 66.646  | 0.0836  | 0.63572 | 0.12106 |  |
|                 | <i>GmLac76</i> | 0       | 1.31579 | 1.54197 | 2.35281  | 0        | 20.3688 | 0.01065 | 0.14062 | 0.03435 |  |
| GmLac22-GmLac78 | <i>GmLac22</i> | 0.43127 | 0.96933 | 3.16485 | 0.303696 | 0.040318 | 5.16388 | 0.51652 | 1.211   | 0.17482 |  |

|                            |                        |         |         |         |          |          |         |         |         |         |
|----------------------------|------------------------|---------|---------|---------|----------|----------|---------|---------|---------|---------|
|                            | <i>GmLac78</i>         | 0.09805 | 0.02228 | 0.07835 | 0        | 0.022626 | 0       | 0       | 0       | 0       |
| GmLac25-GmLac82            | <i>GmLac25</i>         | 0.19815 | 0       | 0       | 0.006065 | 0        | 1.05872 | 0.19917 | 0.0324  | 505.028 |
|                            | <i>GmLac82</i>         | 0       | 0       | 0       | 0        | 0        | 0.02196 | 0       | 0       | 19.5856 |
| GmLac27-GmLac51            | <i>GmLac27</i>         | 13.2612 | 23.5916 | 7.66377 | 8.58861  | 6.76724  | 3.94651 | 17.1658 | 0.40598 | 1.85107 |
|                            | <i>GmLac51</i>         | 14.6344 | 19.9245 | 7.12984 | 60.1506  | 3.77382  | 61.1832 | 61.508  | 7.11307 | 12.9894 |
| GmLac27-GmLac63            | <i>GmLac27</i>         | 13.2612 | 23.5916 | 7.66377 | 8.58861  | 6.76724  | 3.94651 | 17.1658 | 0.40598 | 1.85107 |
|                            | <i>GmLac63</i>         | 0       | 0       | 0       | 0        | 0        | 0.0168  | 0.01694 | 0       | 0.04252 |
| GmLac27-GmLac65            | <i>GmLac27</i>         | 13.2612 | 23.5916 | 7.66377 | 8.58861  | 6.76724  | 3.94651 | 17.1658 | 0.40598 | 1.85107 |
|                            | <i>GmLac65</i>         | 69.5094 | 127.582 | 54.7256 | 26.1075  | 33.7318  | 26.3119 | 62.9141 | 1.38782 | 4.15973 |
| GmLac2-<br>Glyma.07G146000 | <i>GmLac2</i>          | 0.93778 | 6.29774 | 12.5775 | 10.4539  | 0.446109 | 70.5273 | 3.30847 | 5.92531 | 1.92027 |
|                            | <i>Glyma.07G146000</i> | #N/A    | #N/A    | #N/A    | #N/A     | #N/A     | #N/A    | #N/A    | #N/A    | #N/A    |
| GmLac2-GmLac59             | <i>GmLac2</i>          | 0.93778 | 6.29774 | 12.5775 | 10.4539  | 0.446109 | 70.5273 | 3.30847 | 5.92531 | 1.92027 |
|                            | <i>GmLac59</i>         | 0.43981 | 3.74448 | 9.644   | 15.6223  | 0.009872 | 40.7784 | 1.54436 | 5.86649 | 1.01082 |
| GmLac2-GmLac81             | <i>GmLac2</i>          | 0.93778 | 6.29774 | 12.5775 | 10.4539  | 0.446109 | 70.5273 | 3.30847 | 5.92531 | 1.92027 |
|                            | <i>GmLac81</i>         | 0.05663 | 0.48416 | 1.08664 | 8.97794  | 0        | 10.1503 | 0.04955 | 0.05114 | 0.22449 |
| GmLac2-GmLac9              | <i>GmLac2</i>          | 0.93778 | 6.29774 | 12.5775 | 10.4539  | 0.446109 | 70.5273 | 3.30847 | 5.92531 | 1.92027 |
|                            | <i>GmLac9</i>          | 1.00406 | 7.28371 | 15.9315 | 10.7808  | 0.614239 | 75.2652 | 3.25306 | 5.61638 | 2.1843  |
| GmLac31-GmLac73            | <i>GmLac31</i>         | 0.90632 | 3.45205 | 6.41611 | 3.36955  | 0.009214 | 15.2291 | 4.50745 | 1.76054 | 1.09615 |
|                            | <i>GmLac73</i>         | 0.15953 | 0.3692  | 0.78328 | 1.50807  | 0.068867 | 3.05038 | 0.40712 | 0.07094 | 0.08397 |
| GmLac36-GmLac89            | <i>GmLac36</i>         | 0       | 0       | 0.03789 | 0.020697 | 0        | 0.02498 | 0       | 0       | 0.08961 |
|                            | <i>GmLac89</i>         | 4.43886 | 0.27797 | 0.09775 | 0.039624 | 0.054457 | 0.09208 | 0.0395  | 0       | 2.18046 |
| GmLac37-GmLac87            | <i>GmLac37</i>         | 3.77682 | 0.02212 | 0.03889 | 0.105609 | 7.01387  | 0.79394 | 23.4562 | 0.11764 | 0.7901  |
|                            | <i>GmLac87</i>         | 13.599  | 0.02908 | 0       | 0        | 0.009975 | 2.87219 | 117.911 | 0       | 2.53511 |
| GmLac39-GmLac86            | <i>GmLac39</i>         | 0.76328 | 2.28925 | 0.91852 | 8.24112  | 4.8665   | 3.74118 | 3.59805 | 11.3878 | 3.13858 |
|                            | <i>GmLac86</i>         | 1.24634 | 5.09379 | 6.20044 | 10.3649  | 17.2005  | 28.81   | 6.62957 | 23.1612 | 10.6752 |
| GmLac3-GmLac41             | <i>GmLac3</i>          | 0.64027 | 0.77805 | 1.3811  | 0.137099 | 0.174104 | 0.16974 | 0.24305 | 0.19788 | 0.20581 |

|                 |                |         |         |         |          |          |         |         |         |         |  |
|-----------------|----------------|---------|---------|---------|----------|----------|---------|---------|---------|---------|--|
|                 | <i>GmLac41</i> | 0.62883 | 0.97714 | 3.94434 | 0.933297 | 0.583836 | 1.82749 | 1.53321 | 1.65908 | 0.89617 |  |
| GmLac40-GmLac67 | <i>GmLac40</i> | 33.5331 | 59.2758 | 40.5081 | 33.9158  | 10.2627  | 87.0806 | 43.9428 | 6.09931 | 9.00949 |  |
|                 | <i>GmLac67</i> | 6.64409 | 15.7084 | 22.6459 | 33.7204  | 1.0697   | 206.436 | 32.8812 | 0.42912 | 5.14144 |  |
| GmLac43-GmLac49 | <i>GmLac43</i> | 3.1083  | 2.62313 | 1.37643 | 2.34784  | 3.15556  | 5.40909 | 0.84527 | 2.10894 | 3.56281 |  |
|                 | <i>GmLac49</i> | 5.96154 | 1.85364 | 2.95741 | 0.416756 | 0.216855 | 1.84117 | 0.46237 | 0.65547 | 1.46521 |  |
| GmLac44-GmLac50 | <i>GmLac44</i> | 0.04611 | 0.18383 | 0.39179 | 219.151  | 0.009614 | 0.30732 | 0.07063 | 0.15598 | 2.35643 |  |
|                 | <i>GmLac50</i> | 0.2465  | 2.16443 | 3.28555 | 45.742   | 0.19514  | 6.86754 | 0.41932 | 1.29423 | 0.74085 |  |
| GmLac44-GmLac56 | <i>GmLac44</i> | 0.04611 | 0.18383 | 0.39179 | 219.151  | 0.009614 | 0.30732 | 0.07063 | 0.15598 | 2.35643 |  |
|                 | <i>GmLac56</i> | 0       | 0       | 0       | 1.37444  | 0        | 0       | 0.20844 | 0       | 0.02231 |  |
| GmLac44-GmLac76 | <i>GmLac44</i> | 0.04611 | 0.18383 | 0.39179 | 219.151  | 0.009614 | 0.30732 | 0.07063 | 0.15598 | 2.35643 |  |
|                 | <i>GmLac76</i> | 0       | 1.31579 | 1.54197 | 2.35281  | 0        | 20.3688 | 0.01065 | 0.14062 | 0.03435 |  |
| GmLac45-GmLac61 | <i>GmLac45</i> | 0.70011 | 0.04702 | 0.03301 | 6.21115  | 0.038505 | 1.63832 | 16.0232 | 0       | 0.82492 |  |
|                 | <i>GmLac61</i> | 1.33023 | 8.77965 | 14.2139 | 0.552605 | 0.114535 | 0.90016 | 0.07608 | 0.15593 | 1.45204 |  |
| GmLac45-GmLac70 | <i>GmLac45</i> | 0.70011 | 0.04702 | 0.03301 | 6.21115  | 0.038505 | 1.63832 | 16.0232 | 0       | 0.82492 |  |
|                 | <i>GmLac70</i> | 2.01994 | 5.1544  | 3.85343 | 131.307  | 0.015703 | 31.122  | 0.3685  | 2.14749 | 1.1624  |  |
| GmLac45-GmLac71 | <i>GmLac45</i> | 0.70011 | 0.04702 | 0.03301 | 6.21115  | 0.038505 | 1.63832 | 16.0232 | 0       | 0.82492 |  |
|                 | <i>GmLac71</i> | 0.25852 | 0.01825 | 0       | 1.04685  | 0        | 0.90019 | 11.9166 | 0       | 0.20754 |  |
| GmLac46-GmLac58 | <i>GmLac46</i> | 3.38403 | 3.71224 | 3.92638 | 71.1852  | 0.07004  | 42.1577 | 0.8744  | 5.17488 | 1.1463  |  |
|                 | <i>GmLac58</i> | 0.74271 | 7.17297 | 7.1864  | 6.99751  | 0.075354 | 66.2303 | 1.78565 | 0.23115 | 0.69734 |  |
| GmLac46-GmLac61 | <i>GmLac46</i> | 3.38403 | 3.71224 | 3.92638 | 71.1852  | 0.07004  | 42.1577 | 0.8744  | 5.17488 | 1.1463  |  |
|                 | <i>GmLac61</i> | 1.33023 | 8.77965 | 14.2139 | 0.552605 | 0.114535 | 0.90016 | 0.07608 | 0.15593 | 1.45204 |  |
| GmLac46-GmLac70 | <i>GmLac46</i> | 3.38403 | 3.71224 | 3.92638 | 71.1852  | 0.07004  | 42.1577 | 0.8744  | 5.17488 | 1.1463  |  |
|                 | <i>GmLac70</i> | 2.01994 | 5.1544  | 3.85343 | 131.307  | 0.015703 | 31.122  | 0.3685  | 2.14749 | 1.1624  |  |
| GmLac50-GmLac56 | <i>GmLac50</i> | 0.2465  | 2.16443 | 3.28555 | 45.742   | 0.19514  | 6.86754 | 0.41932 | 1.29423 | 0.74085 |  |
|                 | <i>GmLac56</i> | 0       | 0       | 0       | 1.37444  | 0        | 0       | 0.20844 | 0       | 0.02231 |  |
| GmLac50-GmLac76 | <i>GmLac50</i> | 0.2465  | 2.16443 | 3.28555 | 45.742   | 0.19514  | 6.86754 | 0.41932 | 1.29423 | 0.74085 |  |



|                 |                |         |         |         |          |          |         |         |         |         |  |
|-----------------|----------------|---------|---------|---------|----------|----------|---------|---------|---------|---------|--|
|                 | <i>GmLac76</i> | 0       | 1.31579 | 1.54197 | 2.35281  | 0        | 20.3688 | 0.01065 | 0.14062 | 0.03435 |  |
| GmLac51-GmLac53 | <i>GmLac51</i> | 14.6344 | 19.9245 | 7.12984 | 60.1506  | 3.77382  | 61.1832 | 61.508  | 7.11307 | 12.9894 |  |
|                 | <i>GmLac53</i> | 3.07529 | 7.9933  | 5.14657 | 2.42602  | 2.65726  | 2.08877 | 1.85632 | 0.21466 | 0.62825 |  |
| GmLac51-GmLac63 | <i>GmLac51</i> | 14.6344 | 19.9245 | 7.12984 | 60.1506  | 3.77382  | 61.1832 | 61.508  | 7.11307 | 12.9894 |  |
|                 | <i>GmLac63</i> | 0       | 0       | 0       | 0        | 0        | 0.0168  | 0.01694 | 0       | 0.04252 |  |
| GmLac51-GmLac65 | <i>GmLac51</i> | 14.6344 | 19.9245 | 7.12984 | 60.1506  | 3.77382  | 61.1832 | 61.508  | 7.11307 | 12.9894 |  |
|                 | <i>GmLac65</i> | 69.5094 | 127.582 | 54.7256 | 26.1075  | 33.7318  | 26.3119 | 62.9141 | 1.38782 | 4.15973 |  |
| GmLac55-GmLac83 | <i>GmLac55</i> | 162.496 | 50.7464 | 30.2307 | 12.3806  | 3.08989  | 36.7526 | 8.76674 | 12.1943 | 4.62867 |  |
|                 | <i>GmLac83</i> | 0.03273 | 0.19458 | 0.47356 | 0.05701  | 0.091618 | 0.08484 | 0       | 0.0178  | 0.26555 |  |
| GmLac56-GmLac76 | <i>GmLac56</i> | 0       | 0       | 0       | 1.37444  | 0        | 0       | 0.20844 | 0       | 0.02231 |  |
|                 | <i>GmLac76</i> | 0       | 1.31579 | 1.54197 | 2.35281  | 0        | 20.3688 | 0.01065 | 0.14062 | 0.03435 |  |
| GmLac58-GmLac61 | <i>GmLac58</i> | 0.74271 | 7.17297 | 7.1864  | 6.99751  | 0.075354 | 66.2303 | 1.78565 | 0.23115 | 0.69734 |  |
|                 | <i>GmLac61</i> | 1.33023 | 8.77965 | 14.2139 | 0.552605 | 0.114535 | 0.90016 | 0.07608 | 0.15593 | 1.45204 |  |
| GmLac58-GmLac70 | <i>GmLac58</i> | 0.74271 | 7.17297 | 7.1864  | 6.99751  | 0.075354 | 66.2303 | 1.78565 | 0.23115 | 0.69734 |  |
|                 | <i>GmLac70</i> | 2.01994 | 5.1544  | 3.85343 | 131.307  | 0.015703 | 31.122  | 0.3685  | 2.14749 | 1.1624  |  |
| GmLac58-GmLac71 | <i>GmLac58</i> | 0.74271 | 7.17297 | 7.1864  | 6.99751  | 0.075354 | 66.2303 | 1.78565 | 0.23115 | 0.69734 |  |
|                 | <i>GmLac71</i> | 0.25852 | 0.01825 | 0       | 1.04685  | 0        | 0.90019 | 11.9166 | 0       | 0.20754 |  |
| GmLac59-GmLac81 | <i>GmLac59</i> | 0.43981 | 3.74448 | 9.644   | 15.6223  | 0.009872 | 40.7784 | 1.54436 | 5.86649 | 1.01082 |  |
|                 | <i>GmLac81</i> | 0.05663 | 0.48416 | 1.08664 | 8.97794  | 0        | 10.1503 | 0.04955 | 0.05114 | 0.22449 |  |
| GmLac5-GmLac40  | <i>GmLac5</i>  | 29.8675 | 66.0376 | 33.9908 | 37.2338  | 14.5517  | 46.413  | 24.14   | 2.00479 | 6.7772  |  |
|                 | <i>GmLac40</i> | 33.5331 | 59.2758 | 40.5081 | 33.9158  | 10.2627  | 87.0806 | 43.9428 | 6.09931 | 9.00949 |  |
| GmLac5-GmLac67  | <i>GmLac5</i>  | 29.8675 | 66.0376 | 33.9908 | 37.2338  | 14.5517  | 46.413  | 24.14   | 2.00479 | 6.7772  |  |
|                 | <i>GmLac67</i> | 6.64409 | 15.7084 | 22.6459 | 33.7204  | 1.0697   | 206.436 | 32.8812 | 0.42912 | 5.14144 |  |
| GmLac60-GmLac72 | <i>GmLac60</i> | 1.90439 | 3.5269  | 8.78535 | 0.979661 | 0.027152 | 5.6743  | 0.55415 | 1.62477 | 0.29559 |  |
|                 | <i>GmLac72</i> | 0.59074 | 1.08296 | 1.3223  | 0.153116 | 0.056937 | 10.8463 | 1.09876 | 1.00401 | 0.2863  |  |
| GmLac61-GmLac70 | <i>GmLac61</i> | 1.33023 | 8.77965 | 14.2139 | 0.552605 | 0.114535 | 0.90016 | 0.07608 | 0.15593 | 1.45204 |  |

|                 |                |         |         |         |          |          |         |         |         |         |  |
|-----------------|----------------|---------|---------|---------|----------|----------|---------|---------|---------|---------|--|
|                 | <i>GmLac70</i> | 2.01994 | 5.1544  | 3.85343 | 131.307  | 0.015703 | 31.122  | 0.3685  | 2.14749 | 1.1624  |  |
| GmLac61-GmLac71 | <i>GmLac61</i> | 1.33023 | 8.77965 | 14.2139 | 0.552605 | 0.114535 | 0.90016 | 0.07608 | 0.15593 | 1.45204 |  |
|                 | <i>GmLac71</i> | 0.25852 | 0.01825 | 0       | 1.04685  | 0        | 0.90019 | 11.9166 | 0       | 0.20754 |  |
| GmLac62-GmLac69 | <i>GmLac62</i> | 27.3235 | 53.2608 | 32.2232 | 21.1231  | 15.6818  | 33.0403 | 8.41675 | 0.99737 | 2.09606 |  |
|                 | <i>GmLac69</i> | 47.0863 | 65.8791 | 29.7196 | 2.73122  | 0.358669 | 28.528  | 16.0405 | 3.84799 | 4.1437  |  |
| GmLac63-GmLac65 | <i>GmLac63</i> | 0       | 0       | 0       | 0        | 0        | 0.0168  | 0.01694 | 0       | 0.04252 |  |
|                 | <i>GmLac65</i> | 69.5094 | 127.582 | 54.7256 | 26.1075  | 33.7318  | 26.3119 | 62.9141 | 1.38782 | 4.15973 |  |
| GmLac64-GmLac87 | <i>GmLac64</i> | 1.07807 | 0.38154 | 1.11208 | 29.4318  | 220.487  | 0.42315 | 0.67943 | 0.27023 | 0.65259 |  |
|                 | <i>GmLac87</i> | 13.599  | 0.02908 | 0       | 0        | 0.009975 | 2.87219 | 117.911 | 0       | 2.53511 |  |
| GmLac6-GmLac60  | <i>GmLac6</i>  | 1.67197 | 3.92088 | 8.33462 | 0.68082  | 0.036188 | 17.817  | 1.36841 | 1.64478 | 0.26018 |  |
|                 | <i>GmLac60</i> | 1.90439 | 3.5269  | 8.78535 | 0.979661 | 0.027152 | 5.6743  | 0.55415 | 1.62477 | 0.29559 |  |
| GmLac6-GmLac72  | <i>GmLac6</i>  | 1.67197 | 3.92088 | 8.33462 | 0.68082  | 0.036188 | 17.817  | 1.36841 | 1.64478 | 0.26018 |  |
|                 | <i>GmLac72</i> | 0.59074 | 1.08296 | 1.3223  | 0.153116 | 0.056937 | 10.8463 | 1.09876 | 1.00401 | 0.2863  |  |
| GmLac70-GmLac71 | <i>GmLac70</i> | 2.01994 | 5.1544  | 3.85343 | 131.307  | 0.015703 | 31.122  | 0.3685  | 2.14749 | 1.1624  |  |
|                 | <i>GmLac71</i> | 0.25852 | 0.01825 | 0       | 1.04685  | 0        | 0.90019 | 11.9166 | 0       | 0.20754 |  |
| GmLac7-GmLac45  | <i>GmLac7</i>  | 3.42752 | 13.1035 | 18.7042 | 0.078483 | 0.152844 | 0.38836 | 0.16382 | 0.0223  | 0.33882 |  |
|                 | <i>GmLac45</i> | 0.70011 | 0.04702 | 0.03301 | 6.21115  | 0.038505 | 1.63832 | 16.0232 | 0       | 0.82492 |  |
| GmLac7-GmLac46  | <i>GmLac7</i>  | 3.42752 | 13.1035 | 18.7042 | 0.078483 | 0.152844 | 0.38836 | 0.16382 | 0.0223  | 0.33882 |  |
|                 | <i>GmLac46</i> | 3.38403 | 3.71224 | 3.92638 | 71.1852  | 0.07004  | 42.1577 | 0.8744  | 5.17488 | 1.1463  |  |
| GmLac7-GmLac58  | <i>GmLac7</i>  | 3.42752 | 13.1035 | 18.7042 | 0.078483 | 0.152844 | 0.38836 | 0.16382 | 0.0223  | 0.33882 |  |
|                 | <i>GmLac58</i> | 0.74271 | 7.17297 | 7.1864  | 6.99751  | 0.075354 | 66.2303 | 1.78565 | 0.23115 | 0.69734 |  |
| GmLac7-GmLac61  | <i>GmLac7</i>  | 3.42752 | 13.1035 | 18.7042 | 0.078483 | 0.152844 | 0.38836 | 0.16382 | 0.0223  | 0.33882 |  |
|                 | <i>GmLac61</i> | 1.33023 | 8.77965 | 14.2139 | 0.552605 | 0.114535 | 0.90016 | 0.07608 | 0.15593 | 1.45204 |  |
| GmLac7-GmLac70  | <i>GmLac7</i>  | 3.42752 | 13.1035 | 18.7042 | 0.078483 | 0.152844 | 0.38836 | 0.16382 | 0.0223  | 0.33882 |  |
|                 | <i>GmLac70</i> | 2.01994 | 5.1544  | 3.85343 | 131.307  | 0.015703 | 31.122  | 0.3685  | 2.14749 | 1.1624  |  |
| GmLac7-GmLac71  | <i>GmLac7</i>  | 3.42752 | 13.1035 | 18.7042 | 0.078483 | 0.152844 | 0.38836 | 0.16382 | 0.0223  | 0.33882 |  |

|                 |                        |         |         |         |          |          |         |         |         |         |  |
|-----------------|------------------------|---------|---------|---------|----------|----------|---------|---------|---------|---------|--|
|                 | <i>GmLac71</i>         | 0.25852 | 0.01825 | 0       | 1.04685  | 0        | 0.90019 | 11.9166 | 0       | 0.20754 |  |
| GmLac7-GmLac8   | <i>GmLac7</i>          | 3.42752 | 13.1035 | 18.7042 | 0.078483 | 0.152844 | 0.38836 | 0.16382 | 0.0223  | 0.33882 |  |
|                 | <i>GmLac8</i>          | 2.95291 | 4.36308 | 3.93721 | 7.97367  | 0.692242 | 32.5842 | 0.56162 | 0.98136 | 1.90525 |  |
| GmLac8-GmLac46  | <i>GmLac8</i>          | 2.95291 | 4.36308 | 3.93721 | 7.97367  | 0.692242 | 32.5842 | 0.56162 | 0.98136 | 1.90525 |  |
|                 | <i>GmLac46</i>         | 3.38403 | 3.71224 | 3.92638 | 71.1852  | 0.07004  | 42.1577 | 0.8744  | 5.17488 | 1.1463  |  |
| GmLac8-GmLac58  | <i>GmLac8</i>          | 2.95291 | 4.36308 | 3.93721 | 7.97367  | 0.692242 | 32.5842 | 0.56162 | 0.98136 | 1.90525 |  |
|                 | <i>GmLac58</i>         | 0.74271 | 7.17297 | 7.1864  | 6.99751  | 0.075354 | 66.2303 | 1.78565 | 0.23115 | 0.69734 |  |
| GmLac8-GmLac70  | <i>GmLac8</i>          | 2.95291 | 4.36308 | 3.93721 | 7.97367  | 0.692242 | 32.5842 | 0.56162 | 0.98136 | 1.90525 |  |
|                 | <i>GmLac70</i>         | 2.01994 | 5.1544  | 3.85343 | 131.307  | 0.015703 | 31.122  | 0.3685  | 2.14749 | 1.1624  |  |
| GmLac9-         | <i>GmLac9</i>          | 1.00406 | 7.28371 | 15.9315 | 10.7808  | 0.614239 | 75.2652 | 3.25306 | 5.61638 | 2.1843  |  |
| Glyma.07G146000 | <i>Glyma.07G146000</i> | #N/A    | #N/A    | #N/A    | #N/A     | #N/A     | #N/A    | #N/A    | #N/A    | #N/A    |  |
| GmLac9-GmLac30  | <i>GmLac9</i>          | 1.00406 | 7.28371 | 15.9315 | 10.7808  | 0.614239 | 75.2652 | 3.25306 | 5.61638 | 2.1843  |  |
|                 | <i>GmLac30</i>         | 0       | 0.01036 | 0       | 0.006569 | 0        | 0.02348 | 0.0958  | 0       | 0.02311 |  |
| GmLac9-GmLac59  | <i>GmLac9</i>          | 1.00406 | 7.28371 | 15.9315 | 10.7808  | 0.614239 | 75.2652 | 3.25306 | 5.61638 | 2.1843  |  |
|                 | <i>GmLac59</i>         | 0.43981 | 3.74448 | 9.644   | 15.6223  | 0.009872 | 40.7784 | 1.54436 | 5.86649 | 1.01082 |  |
| GmLac9-GmLac81  | <i>GmLac9</i>          | 1.00406 | 7.28371 | 15.9315 | 10.7808  | 0.614239 | 75.2652 | 3.25306 | 5.61638 | 2.1843  |  |
|                 | <i>GmLac81</i>         | 0.05663 | 0.48416 | 1.08664 | 8.97794  | 0        | 10.1503 | 0.04955 | 0.05114 | 0.22449 |  |

Note: Each gene, in a collinear gene pair, expression pattern are list in two adjacent rows from top to bottom. The yellow color block on the right is indicated the expression patterns between the two genes were completely differentiated.

**Table S7a. Soybean laccase genes expression pattern following *P. sojae* infection.** (Table declares are listed at the bottom of the table)

| <b>Gene id</b>         | <b>Gene name</b> | <b>0 hpi*</b> | <b>0.5 hpi*</b> | <b>3 hpi*</b> | <b>6hpi*</b> | <b>12 hpi*</b> |
|------------------------|------------------|---------------|-----------------|---------------|--------------|----------------|
| <i>Glyma.01G108200</i> | <i>GmLac1</i>    | 0.25129       | 0.876055        | 0.314865      | 0.768322     | 3.87485        |
| <i>Glyma.01G112600</i> | <i>GmLac2</i>    | 28.6364       | 21.4187         | 26.4788       | 25.1372      | 20.7291        |
| <i>Glyma.01G173500</i> | <i>GmLac3</i>    | 3.34838       | 3.12014         | 3.46683       | 3.4258       | 2.48398        |
| <i>Glyma.01G173600</i> | <i>GmLac4</i>    | 12.0184       | 11.7906         | 9.01021       | 7.41335      | 7.41843        |
| <i>Glyma.01G183100</i> | <i>GmLac5</i>    | 52.014        | 148.935         | 38.0585       | 37.0248      | 18.0217        |
| <i>Glyma.02G224800</i> | <i>GmLac6</i>    | 13.7993       | 12.6858         | 16.5226       | 15.3783      | 9.49244        |
| <i>Glyma.02G231600</i> | <i>GmLac7</i>    | 29.1847       | 30.0099         | 12.4735       | 8.59736      | 5.73199        |
| <i>Glyma.02G261600</i> | <i>GmLac8</i>    | 2.38593       | 1.98972         | 2.50418       | 4.38711      | 2.66812        |
| <i>Glyma.03G077900</i> | <i>GmLac9</i>    | 29.5307       | 20.5792         | 29.441        | 25.2752      | 15.7642        |
| <i>Glyma.04G019500</i> | <i>GmLac10</i>   | 22.316        | 16.8781         | 23.6979       | 22.0096      | 5.41979        |
| <i>Glyma.04G119600</i> | <i>GmLac11</i>   | 5.73385       | 4.15383         | 3.66032       | 3.24543      | 1.52566        |
| <i>Glyma.05G056100</i> | <i>GmLac12</i>   | 68.893        | 64.3919         | 37.0832       | 44.0194      | 17.319         |
| <i>Glyma.05G082700</i> | <i>GmLac13</i>   | 0.702849      | 0.560078        | 0.59208       | 0.114705     | 0.352659       |
| <i>Glyma.06G019800</i> | <i>GmLac14</i>   | 25.8536       | 29.7824         | 24.0782       | 19.2745      | 6.21724        |
| <i>Glyma.06G284300</i> | <i>GmLac15</i>   | 0.110318      | 0.109865        | 0             | 0            | 0              |
| <i>Glyma.06G307100</i> | <i>GmLac16</i>   | 30.4785       | 42.4646         | 34.2145       | 24.1045      | 10.7268        |
| <i>Glyma.06G318800</i> | <i>GmLac17</i>   | 4.79285       | 3.23413         | 3.10204       | 3.73502      | 2.04709        |
| <i>Glyma.07G054100</i> | <i>GmLac18</i>   | 0.126007      | 0               | 0.0631536     | 0.0642098    | 0              |
| <i>Glyma.07G054200</i> | <i>GmLac19</i>   | 0.540941      | 0.0950956       | 0.127865      | 0.358264     | 0.0332556      |
| <i>Glyma.07G133900</i> | <i>GmLac20</i>   | 4.02223       | 3.12268         | 3.43984       | 3.25701      | 1.48403        |
| <i>Glyma.07G134100</i> | <i>GmLac21</i>   | 4.50357       | 2.65836         | 3.06687       | 3.91382      | 3.77785        |
| <i>Glyma.07G142400</i> | <i>GmLac22</i>   | 8.13249       | 7.86233         | 9.71251       | 7.74313      | 5.376          |
| <i>Glyma.07G142500</i> | <i>GmLac23</i>   | 0             | 0.478863        | 0.240997      | 0            | 0.125642       |
| <i>Glyma.07G142600</i> | <i>GmLac24</i>   | 27.4851       | 20.842          | 16.8913       | 21.9461      | 21.8717        |

|                        |                |           |           |           |           |          |
|------------------------|----------------|-----------|-----------|-----------|-----------|----------|
| <i>Glyma.07G225300</i> | <i>GmLac25</i> | 0.123725  | 0         | 0         | 0.126113  | 0.194014 |
| <i>Glyma.07G225400</i> | <i>GmLac26</i> | 0         | 0         | 0         | 0         | 0        |
| <i>Glyma.07G261800</i> | <i>GmLac27</i> | 24.6374   | 11.7348   | 6.25899   | 8.06931   | 3.43014  |
| <i>Glyma.08G138900</i> | <i>GmLac28</i> | 0         | 0         | 0         | 0.0944281 | 1.26478  |
| <i>Glyma.08G343500</i> | <i>GmLac29</i> | 7.12392   | 5.33623   | 7.02962   | 7.03382   | 4.5278   |
| <i>Glyma.08G353500</i> | <i>GmLac30</i> | 0         | 0         | 0         | 0         | 0        |
| <i>Glyma.08G359100</i> | <i>GmLac31</i> | 10.6903   | 8.41241   | 6.80911   | 4.47284   | 3.0172   |
| <i>Glyma.08G359200</i> | <i>GmLac32</i> | 0.321519  | 0.0800582 | 0.0804722 | 0.245168  | 0        |
| <i>Glyma.08G359300</i> | <i>GmLac33</i> | 4.23499   | 3.07961   | 2.04062   | 1.87564   | 0.796766 |
| <i>Glyma.08G359400</i> | <i>GmLac34</i> | 0         | 0         | 0         | 0         | 0        |
| <i>Glyma.09G132400</i> | <i>GmLac35</i> | 0         | 0         | 0         | 0         | 0        |
| <i>Glyma.10G197300</i> | <i>GmLac36</i> | 0         | 0.067923  | 0         | 0         | 0        |
| <i>Glyma.10G219100</i> | <i>GmLac37</i> | 0         | 0         | 0.0624724 | 0         | 0        |
| <i>Glyma.10G219200</i> | <i>GmLac38</i> | 0         | 0         | 0         | 0         | 0        |
| <i>Glyma.10G263800</i> | <i>GmLac39</i> | 1.25577   | 1.13715   | 1.03033   | 0.989759  | 0.477358 |
| <i>Glyma.11G059200</i> | <i>GmLac40</i> | 52.2743   | 141.092   | 36.0018   | 35.2119   | 18.506   |
| <i>Glyma.11G069500</i> | <i>GmLac41</i> | 8.14801   | 8.17327   | 6.27185   | 6.4962    | 4.2588   |
| <i>Glyma.11G069600</i> | <i>GmLac42</i> | 10.2873   | 8.68894   | 10.7361   | 9.29235   | 5.157    |
| <i>Glyma.11G097300</i> | <i>GmLac43</i> | 5.28157   | 80.1014   | 13.6874   | 5.70817   | 6.38688  |
| <i>Glyma.11G137500</i> | <i>GmLac44</i> | 2.05062   | 2.26955   | 2.14206   | 1.74302   | 1.66727  |
| <i>Glyma.11G164000</i> | <i>GmLac45</i> | 0.0606944 | 0         | 0         | 0         | 0        |
| <i>Glyma.11G233400</i> | <i>GmLac46</i> | 5.18374   | 4.88284   | 2.9383    | 3.27616   | 2.59161  |
| <i>Glyma.11G236800</i> | <i>GmLac47</i> | 0         | 0.0618643 | 0         | 0.0633054 | 0        |
| <i>Glyma.11G256700</i> | <i>GmLac48</i> | 0.0659301 | 0         | 0         | 0         | 0        |
| <i>Glyma.12G023300</i> | <i>GmLac49</i> | 5.04251   | 89.8709   | 13.052    | 3.98345   | 3.51406  |
| <i>Glyma.12G060900</i> | <i>GmLac50</i> | 2.34678   | 1.83206   | 1.54402   | 1.65203   | 0.623523 |

|                        |                |           |           |          |           |           |
|------------------------|----------------|-----------|-----------|----------|-----------|-----------|
| <i>Glyma.12G097700</i> | <i>GmLac51</i> | 10.5178   | 12.6154   | 8.69565  | 7.90337   | 3.8069    |
| <i>Glyma.12G121700</i> | <i>GmLac52</i> | 2.71466   | 2.46365   | 2.47972  | 1.84511   | 1.19822   |
| <i>Glyma.12G192800</i> | <i>GmLac53</i> | 16.4115   | 10.1854   | 9.54012  | 9.23773   | 6.62683   |
| <i>Glyma.13G033600</i> | <i>GmLac54</i> | 0         | 0         | 0        | 0         | 0         |
| <i>Glyma.13G076900</i> | <i>GmLac55</i> | 117.097   | 821.016   | 382.457  | 147.277   | 252.838   |
| <i>Glyma.13G338100</i> | <i>GmLac56</i> | 0         | 0         | 0        | 0         | 0         |
| <i>Glyma.14G041300</i> | <i>GmLac57</i> | 0         | 0.0577009 | 0.34852  | 0         | 0.0605557 |
| <i>Glyma.14G056100</i> | <i>GmLac58</i> | 4.38833   | 4.14409   | 2.85757  | 3.74943   | 2.32348   |
| <i>Glyma.14G062300</i> | <i>GmLac59</i> | 6.48866   | 4.75081   | 9.90043  | 10.1843   | 5.50746   |
| <i>Glyma.14G191500</i> | <i>GmLac60</i> | 14.0939   | 12.4314   | 12.7878  | 11.6099   | 8.54723   |
| <i>Glyma.14G198900</i> | <i>GmLac61</i> | 21.0053   | 18.4099   | 6.76567  | 4.84649   | 2.39212   |
| <i>Glyma.14G223000</i> | <i>GmLac62</i> | 43.5643   | 28.1977   | 21.742   | 31.6227   | 8.76477   |
| <i>Glyma.15G109000</i> | <i>GmLac63</i> | 0         | 0         | 0        | 0         | 0         |
| <i>Glyma.16G158400</i> | <i>GmLac64</i> | 1.92559   | 0.516368  | 0.741796 | 0.979732  | 1.31635   |
| <i>Glyma.17G012300</i> | <i>GmLac65</i> | 96.5633   | 40.2426   | 29.4442  | 45.4458   | 15.1087   |
| <i>Glyma.17G138300</i> | <i>GmLac66</i> | 71.2975   | 61.4042   | 35.1519  | 39.8103   | 18.1958   |
| <i>Glyma.17G180400</i> | <i>GmLac67</i> | 38.169    | 35.1837   | 24.2418  | 31.2514   | 14.583    |
| <i>Glyma.17G180500</i> | <i>GmLac68</i> | 123.461   | 103.313   | 37.6063  | 31.1206   | 12.1757   |
| <i>Glyma.17G261500</i> | <i>GmLac69</i> | 102.478   | 74.2013   | 58.792   | 60.5567   | 21.9033   |
| <i>Glyma.18G023600</i> | <i>GmLac70</i> | 7.00827   | 4.845     | 5.56127  | 9.1281    | 5.13901   |
| <i>Glyma.18G057200</i> | <i>GmLac71</i> | 0.0553463 | 0         | 0.111016 | 0         | 0.0578558 |
| <i>Glyma.18G065100</i> | <i>GmLac72</i> | 2.61536   | 2.6051    | 2.56265  | 1.15155   | 0.932061  |
| <i>Glyma.18G177200</i> | <i>GmLac73</i> | 4.57646   | 3.45137   | 2.22777  | 2.35348   | 1.0594    |
| <i>Glyma.18G177300</i> | <i>GmLac74</i> | 4.93331   | 3.8716    | 2.30822  | 2.24571   | 1.21898   |
| <i>Glyma.18G177400</i> | <i>GmLac75</i> | 0.301963  | 0.120311  | 0.302738 | 0.0615709 | 0         |
| <i>Glyma.18G183500</i> | <i>GmLac76</i> | 0.0572601 | 0.057036  | 0        | 0.0584027 | 0         |

|                        |                |           |          |           |          |          |
|------------------------|----------------|-----------|----------|-----------|----------|----------|
| <i>Glyma.18G183700</i> | <i>GmLac77</i> | 2.14331   | 1.20432  | 0.992141  | 1.85035  | 1.32131  |
| <i>Glyma.18G193200</i> | <i>GmLac78</i> | 0.0661296 | 0.263474 | 0.198817  | 0        | 0        |
| <i>Glyma.18G193300</i> | <i>GmLac79</i> | 0         | 0.500434 | 0.647115  | 0.073061 | 0.075041 |
| <i>Glyma.18G193400</i> | <i>GmLac80</i> | 40.1431   | 23.0192  | 84.5537   | 98.3622  | 85.4     |
| <i>Glyma.18G197400</i> | <i>GmLac81</i> | 0.556563  | 0.221755 | 0.446543  | 0.454236 | 0.23272  |
| <i>Glyma.20G025200</i> | <i>GmLac82</i> | 0         | 0        | 0         | 0        | 0        |
| <i>Glyma.20G051600</i> | <i>GmLac83</i> | 0.677811  | 0.289311 | 0.0968291 | 0.294676 | 0.405037 |
| <i>Glyma.20G051700</i> | <i>GmLac84</i> | 6.52082   | 104.172  | 13.8237   | 20.7698  | 64.6281  |
| <i>Glyma.20G051900</i> | <i>GmLac85</i> | 79.5271   | 203.215  | 104.422   | 60.3023  | 18.4677  |
| <i>Glyma.20G126500</i> | <i>GmLac86</i> | 7.79613   | 7.56936  | 4.75486   | 5.6498   | 2.39497  |
| <i>Glyma.20G172600</i> | <i>GmLac87</i> | 0         | 0        | 0         | 0        | 0        |
| <i>Glyma.20G172700</i> | <i>GmLac88</i> | 0         | 0        | 0         | 0        | 0        |
| <i>Glyma.20G192800</i> | <i>GmLac89</i> | 0.165452  | 0        | 0         | 0.168799 | 0.115302 |
| <i>Glyma.20G192900</i> | <i>GmLac90</i> | 0.115672  | 0        | 0         | 0        | 0        |
| <i>Glyma.U027300</i>   | <i>GmLac91</i> | 0.0560847 | 1.7877   | 6.35578   | 23.0569  | 73.7541  |
| <i>Glyma.U027400</i>   | <i>GmLac92</i> | 0.791223  | 6.30493  | 73.16     | 310.855  | 234.526  |
| <i>Glyma.U040600</i>   | <i>GmLac93</i> | 5.53021   | 74.0722  | 24.0678   | 15.1182  | 50.1238  |

Note: **hpi** (hours post infection); **FPKM** (Fragments per Kilobase Million); **0 hpi, 0.5 hpi, 3 hpi, 6 hpi, 12 hpi** indicate gene FPKM value at different stages of infection.

**Table S7b. Change value of laccase gene inoculation with *P.sojae* ( $\Delta$ FPKM).** (Table descriptions are listed at the bottom of the table)

| Gene id                | Gene name     | $\Delta$ FPKM <sub>0.5 hpi</sub> * | $\Delta$ FPKM <sub>3 hpi</sub> * | $\Delta$ FPKM <sub>6 hpi</sub> * | $\Delta$ FPKM <sub>12 hpi</sub> * |
|------------------------|---------------|------------------------------------|----------------------------------|----------------------------------|-----------------------------------|
| <i>Glyma.01G108200</i> | <i>GmLac1</i> | 1.797584293                        | 0.324225062                      | 1.608504542                      | 3.941357809                       |
| <i>Glyma.01G112600</i> | <i>GmLac2</i> | -0.418962242                       | -0.11300829                      | -0.188019165                     | -0.46617344                       |

|                        |                |              |              |              |              |
|------------------------|----------------|--------------|--------------|--------------|--------------|
| <i>Glyma.01G173500</i> | <i>GmLac3</i>  | -0.101820993 | 0.050139112  | 0.032967929  | -0.430659824 |
| <i>Glyma.01G173600</i> | <i>GmLac4</i>  | -0.027605389 | -0.415572134 | -0.696972754 | -0.695984619 |
| <i>Glyma.01G183100</i> | <i>GmLac5</i>  | 1.517692886  | -0.450671117 | -0.490396818 | -1.529112566 |
| <i>Glyma.02G224800</i> | <i>GmLac6</i>  | -0.121371406 | 0.259828412  | 0.15629021   | -0.539696774 |
| <i>Glyma.02G231600</i> | <i>GmLac7</i>  | 0.040224914  | -1.22627968  | -1.763128251 | -2.347902003 |
| <i>Glyma.02G261600</i> | <i>GmLac8</i>  | -0.261865942 | 0.069758008  | 0.878443433  | 0.161207911  |
| <i>Glyma.03G077900</i> | <i>GmLac9</i>  | -0.521007405 | -0.004388731 | -0.224484822 | -0.905520936 |
| <i>Glyma.04G019500</i> | <i>GmLac10</i> | -0.402905122 | 0.086676994  | -0.01994463  | -2.04156808  |
| <i>Glyma.04G119600</i> | <i>GmLac11</i> | -0.464966303 | -0.647391881 | -0.82090165  | -1.909376954 |
| <i>Glyma.05G056100</i> | <i>GmLac12</i> | -0.097476719 | -0.893573697 | -0.646206089 | -1.991939414 |
| <i>Glyma.05G082700</i> | <i>GmLac13</i> | -0.327064608 | -0.247039232 | -2.604814745 | -0.992906978 |
| <i>Glyma.06G019800</i> | <i>GmLac14</i> | 0.204087473  | -0.102633524 | -0.423652701 | -2.05584278  |
| <i>Glyma.06G284300</i> | <i>GmLac15</i> | -0.005882914 | -6.798543084 | -6.798543084 | -6.798543084 |
| <i>Glyma.06G307100</i> | <i>GmLac16</i> | 0.478455398  | 0.166810794  | -0.338476882 | -1.50648499  |
| <i>Glyma.06G318800</i> | <i>GmLac17</i> | -0.567361081 | -0.627502473 | -0.359682589 | -1.226905654 |
| <i>Glyma.07G054100</i> | <i>GmLac18</i> | -6.988764203 | -0.985305883 | -0.961747313 | -6.988764203 |
| <i>Glyma.07G054200</i> | <i>GmLac19</i> | -2.495593517 | -2.072275319 | -0.593091419 | -3.983724037 |
| <i>Glyma.07G133900</i> | <i>GmLac20</i> | -0.36510755  | -0.225593408 | -0.304363184 | -1.43786214  |
| <i>Glyma.07G134100</i> | <i>GmLac21</i> | -0.760310306 | -0.554152045 | -0.20244342  | -0.253442142 |
| <i>Glyma.07G142400</i> | <i>GmLac22</i> | -0.04873413  | 0.25611818   | -0.07077136  | -0.59707306  |
| <i>Glyma.07G142500</i> | <i>GmLac23</i> | 8.906478768  | 7.918845353  | 0            | 6.984612134  |
| <i>Glyma.07G142600</i> | <i>GmLac24</i> | -0.399139273 | -0.702336443 | -0.324671897 | -0.329570898 |
| <i>Glyma.07G225300</i> | <i>GmLac25</i> | -6.962606859 | -6.962606859 | 0.027360915  | 0.644827029  |
| <i>Glyma.07G225400</i> | <i>GmLac26</i> | 0            | 0            | 0            | 0            |
| <i>Glyma.07G261800</i> | <i>GmLac27</i> | -1.069992381 | -1.976676314 | -1.610212574 | -2.844148673 |
| <i>Glyma.08G138900</i> | <i>GmLac28</i> | 0            | 0            | 6.576342243  | 10.30581096  |



|                        |                |              |              |              |              |
|------------------------|----------------|--------------|--------------|--------------|--------------|
| <i>Glyma.08G343500</i> | <i>GmLac29</i> | -0.416782632 | -0.019221895 | -0.018360306 | -0.653744987 |
| <i>Glyma.08G353500</i> | <i>GmLac30</i> | 0            | 0            | 0            | 0            |
| <i>Glyma.08G359100</i> | <i>GmLac31</i> | -0.345674731 | -0.65068728  | -1.25685172  | -1.824676973 |
| <i>Glyma.08G359200</i> | <i>GmLac32</i> | -1.99235411  | -1.985004383 | -0.38974092  | -8.333240344 |
| <i>Glyma.08G359300</i> | <i>GmLac33</i> | -0.459483132 | -1.052984816 | -1.174547262 | -2.40866164  |
| <i>Glyma.08G359400</i> | <i>GmLac34</i> | 0            | 0            | 0            | 0            |
| <i>Glyma.09G132400</i> | <i>GmLac35</i> | 0            | 0            | 0            | 0            |
| <i>Glyma.10G197300</i> | <i>GmLac36</i> | 6.106913594  | 0            | 0            | 0            |
| <i>Glyma.10G219100</i> | <i>GmLac37</i> | 0            | 5.988057489  | 0            | 0            |
| <i>Glyma.10G219200</i> | <i>GmLac38</i> | 0            | 0            | 0            | 0            |
| <i>Glyma.10G263800</i> | <i>GmLac39</i> | -0.143029941 | -0.285214615 | -0.343114575 | -1.393558017 |
| <i>Glyma.11G059200</i> | <i>GmLac40</i> | 1.432445072  | -0.538020324 | -0.570025389 | -1.498058384 |
| <i>Glyma.11G069500</i> | <i>GmLac41</i> | 0.004465096  | -0.377503737 | -0.326806685 | -0.935839104 |
| <i>Glyma.11G069600</i> | <i>GmLac42</i> | -0.243586495 | 0.06159977   | -0.146733969 | -0.996120938 |
| <i>Glyma.11G097300</i> | <i>GmLac43</i> | 3.922533584  | 1.373641939  | 0.112041042  | 0.274097232  |
| <i>Glyma.11G137500</i> | <i>GmLac44</i> | 0.146278266  | 0.062908702  | -0.234346956 | -0.298410741 |
| <i>Glyma.11G164000</i> | <i>GmLac45</i> | -5.947067637 | -5.947067637 | -5.947067637 | -5.947067637 |
| <i>Glyma.11G233400</i> | <i>GmLac46</i> | -0.086255707 | -0.818799028 | -0.661825533 | -0.999866442 |
| <i>Glyma.11G236800</i> | <i>GmLac47</i> | 5.974169053  | 0            | 6.006867987  | 0            |
| <i>Glyma.11G256700</i> | <i>GmLac48</i> | -6.064583265 | -6.064583265 | -6.064583265 | -6.064583265 |
| <i>Glyma.12G023300</i> | <i>GmLac49</i> | 4.15537008   | 1.3718814    | -0.340047525 | -0.520878803 |
| <i>Glyma.12G060900</i> | <i>GmLac50</i> | -0.357043217 | -0.603671713 | -0.506184319 | -1.910470617 |
| <i>Glyma.12G097700</i> | <i>GmLac51</i> | 0.262330177  | -0.274438451 | -0.412247744 | -1.465902632 |
| <i>Glyma.12G121700</i> | <i>GmLac52</i> | -0.139920079 | -0.130543959 | -0.556814348 | -1.179206517 |
| <i>Glyma.12G192800</i> | <i>GmLac53</i> | -0.688150736 | -0.782564477 | -0.82902856  | -1.308186507 |
| <i>Glyma.13G033600</i> | <i>GmLac54</i> | 0            | 0            | 0            | 0            |

|                        |                |              |              |              |              |
|------------------------|----------------|--------------|--------------|--------------|--------------|
| <i>Glyma.13G076900</i> | <i>GmLac55</i> | 2.80969566   | 1.70758489   | 0.330825505  | 1.110502579  |
| <i>Glyma.13G338100</i> | <i>GmLac56</i> | 0            | 0            | 0            | 0            |
| <i>Glyma.14G041300</i> | <i>GmLac57</i> | 5.875310718  | 8.449231201  | 0            | 5.94382055   |
| <i>Glyma.14G056100</i> | <i>GmLac58</i> | -0.082597313 | -0.61870712  | -0.226944724 | -0.917092727 |
| <i>Glyma.14G062300</i> | <i>GmLac59</i> | -0.449665744 | 0.609494004  | 0.650273673  | -0.236493855 |
| <i>Glyma.14G191500</i> | <i>GmLac60</i> | -0.181068415 | -0.140292343 | -0.279693438 | -0.721475611 |
| <i>Glyma.14G198900</i> | <i>GmLac61</i> | -0.190261918 | -1.634304134 | -2.115512244 | -3.133857426 |
| <i>Glyma.14G223000</i> | <i>GmLac62</i> | -0.627550824 | -1.002628467 | -0.462173304 | -2.313226747 |
| <i>Glyma.15G109000</i> | <i>GmLac63</i> | 0            | 0            | 0            | 0            |
| <i>Glyma.16G158400</i> | <i>GmLac64</i> | -1.896786854 | -1.375011631 | -0.974118726 | -0.548410884 |
| <i>Glyma.17G012300</i> | <i>GmLac65</i> | -1.262730553 | -1.713457448 | -1.087311206 | -2.676014904 |
| <i>Glyma.17G138300</i> | <i>GmLac66</i> | -0.215510892 | -1.020228013 | -0.840693743 | -1.970186958 |
| <i>Glyma.17G180400</i> | <i>GmLac67</i> | -0.117490975 | -0.654882849 | -0.288472202 | -1.38805272  |
| <i>Glyma.17G180500</i> | <i>GmLac68</i> | -0.257031301 | -1.71498243  | -1.988078929 | -3.34187196  |
| <i>Glyma.17G261500</i> | <i>GmLac69</i> | -0.465792492 | -0.801612002 | -0.758945985 | -2.226042287 |
| <i>Glyma.18G023600</i> | <i>GmLac70</i> | -0.532469794 | -0.333590422 | 0.381208439  | -0.447493032 |
| <i>Glyma.18G057200</i> | <i>GmLac71</i> | -5.816248973 | 0.991312033  | -5.816248973 | 0.062863716  |
| <i>Glyma.18G065100</i> | <i>GmLac72</i> | -0.00566862  | -0.02936175  | -1.182731724 | -1.487517756 |
| <i>Glyma.18G177200</i> | <i>GmLac73</i> | -0.406960189 | -1.038299535 | -0.959138811 | -2.109938704 |
| <i>Glyma.18G177300</i> | <i>GmLac74</i> | -0.349545863 | -1.095442731 | -1.135034439 | -2.01599086  |
| <i>Glyma.18G177400</i> | <i>GmLac75</i> | -1.320431238 | 0.0036858    | -2.275577852 | -8.242997802 |
| <i>Glyma.18G183500</i> | <i>GmLac76</i> | -0.005560089 | -5.864436273 | 0.028020329  | -5.864436273 |
| <i>Glyma.18G183700</i> | <i>GmLac77</i> | -0.831097271 | -1.110443027 | -0.211935825 | -0.69745305  |
| <i>Glyma.18G193200</i> | <i>GmLac78</i> | 1.978104949  | 1.573658379  | -6.068877141 | -6.068877141 |
| <i>Glyma.18G193300</i> | <i>GmLac79</i> | 8.969916012  | 9.340106014  | 6.210642124  | 6.2487056    |
| <i>Glyma.18G193400</i> | <i>GmLac80</i> | -0.802287602 | 1.07469698   | 1.292930701  | 1.089064993  |

|                        |                |              |              |              |              |
|------------------------|----------------|--------------|--------------|--------------|--------------|
| <i>Glyma.18G197400</i> | <i>GmLac81</i> | -1.323677012 | -0.317108523 | -0.292520177 | -1.254353632 |
| <i>Glyma.20G025200</i> | <i>GmLac82</i> | 0            | 0            | 0            | 0            |
| <i>Glyma.20G051600</i> | <i>GmLac83</i> | -1.225410706 | -2.794674369 | -1.198992799 | -0.741398745 |
| <i>Glyma.20G051700</i> | <i>GmLac84</i> | 3.997562968  | 1.083901645  | 1.671210255  | 3.308837372  |
| <i>Glyma.20G051900</i> | <i>GmLac85</i> | 1.353477387  | 0.392902903  | -0.399227751 | -2.106382385 |
| <i>Glyma.20G126500</i> | <i>GmLac86</i> | -0.042581281 | -0.713236942 | -0.46448806  | -1.702333344 |
| <i>Glyma.20G172600</i> | <i>GmLac87</i> | 0            | 0            | 0            | 0            |
| <i>Glyma.20G172700</i> | <i>GmLac88</i> | 0            | 0            | 0            | 0            |
| <i>Glyma.20G192800</i> | <i>GmLac89</i> | -7.378962395 | -7.378962395 | 0.028721757  | -0.517230299 |
| <i>Glyma.20G192900</i> | <i>GmLac90</i> | -6.866314561 | -6.866314561 | -6.866314561 | -6.866314561 |
| <i>Glyma.U027300</i>   | <i>GmLac91</i> | 4.969663507  | 6.799048227  | 8.657941288  | 10.33542297  |
| <i>Glyma.U027400</i>   | <i>GmLac92</i> | 2.992730664  | 6.529024398  | 8.616124124  | 8.209631721  |
| <i>Glyma.U040600</i>   | <i>GmLac93</i> | 3.743284642  | 2.121497193  | 1.450714782  | 3.179857553  |

---

Note:  $\Delta\text{FPKM}_{n\_hpi}$  were counted according  $(\text{FPKM}_{n\_hpi}+0.001)/(\text{FPKM}_{0\_hpi}+0.001)$

**Table S8. Primers used for qRT-PCR.**

| <b>Gene name</b> | <b>Gene ID</b>         | <b>Fprimer</b>          | <b>Rprimer</b>          |
|------------------|------------------------|-------------------------|-------------------------|
| <i>GmLac15</i>   | <i>Glyma.06G284300</i> | AGCCTCAGTGTCAACCCTTG    | TCGGTGAAAACACCCTTGATCT  |
| <i>GmLac18</i>   | <i>Glyma.07G054100</i> | ACCACAAACACAGTGATGATTG  | TGCTACACCCATGGAGTATTTT  |
| <i>GmLac23</i>   | <i>Glyma.07G142500</i> | ATCATTTAGTTTCCCCGCCTAA  | GAAGCTAGAAGGGCAAAAACAA  |
| <i>GmLac25</i>   | <i>Glyma.07G225300</i> | TCCATCATGAGATTGAGACGAG  | GAAAGGGTTGTACATCAGTGAC  |
| <i>GmLac28</i>   | <i>Glyma.08G138900</i> | TCAACACGCAGAACAACATAAG  | TTCTCTTTAAGGGCAATGAGGT  |
| <i>GmLac32</i>   | <i>Glyma.08G359200</i> | GGGCCCTTCTATAACGGCTC    | ATAGCTCGTCGTTGAGTGCC    |
| <i>GmLac36</i>   | <i>Glyma.10G197300</i> | CATTCCCTTGTCACAATAGCCAC | TCAGTAGACACGGGCTTTAAAT  |
| <i>GmLac37</i>   | <i>Glyma.10G219100</i> | GCAAGAAACTGTTCCCTCCAAT  | TTTTGTGCGAACAGAGTCTCGTA |
| <i>GmLac45</i>   | <i>Glyma.11G164000</i> | CTTCAAGGATTTGCCAAACAGA  | ACCTAACAAACATACCGCAAAC  |
| <i>GmLac47</i>   | <i>Glyma.11G236800</i> | AGACTGGCTTCAAGTCTAAACA  | TCCTCACTGAAAACCTCCTGAAA |
| <i>GmLac48</i>   | <i>Glyma.11G256700</i> | GATGTGGAACCTAAGATCGGAT  | TCTGGCATATTGTACTCGTCTC  |
| <i>GmLac57</i>   | <i>Glyma.14G041300</i> | CCACACATGTGTTTGTCTTAG   | AACAAGGCATGACTACCTTACA  |
| <i>GmLac71</i>   | <i>Glyma.18G057200</i> | AACAGATCAAGACCAGTTTTGC  | AACCCCAATCCCCTATGAAAT   |
| <i>GmLac75</i>   | <i>Glyma.18G177400</i> | TTCTCTCTCCTTCAAATGGCCC  | TTACTTTCCACACTTTCACCTCA |
| <i>GmLac76</i>   | <i>Glyma.18G183500</i> | TACACCTTTAACGTGCGAGTACC | CCAACGATGGTGAAGTTGTATG  |
| <i>GmLac78</i>   | <i>Glyma.18G193200</i> | AATGTTAACACGGCTTTCAGAG  | AGAACAACCTGGAAGAAAAAGCG |
| <i>GmLac79</i>   | <i>Glyma.18G193300</i> | CACCAGTTATGTTGCGACTTCAC | AATTGAACCTGAGTTTCTTCGC  |
| <i>GmLac89</i>   | <i>Glyma.20G192800</i> | GACGGTCCACCCTTTGCTAA    | GGCCAAAGAATGACACTGCA    |
| <i>GmLac90</i>   | <i>Glyma.20G192900</i> | ACGATTTGGATGATCCCTTGCT  | ATTCCTGCCTGGTTGGATGG    |
| <i>GmLac91</i>   | <i>Glyma.U027300</i>   | AATGAGTCATTTGTGTTGCCTC  | TTTGGGTCCGGTATAGTCAAACA |
| <i>GmLac92</i>   | <i>Glyma.U027400</i>   | TTTTTCTAGCATGTTCCCTTGGC | GATCACTTGTTGACGACACAAA  |

**Table S9a -first half. Sliding window analysis of nucleotide diversity of 93 laccase gene sequence.** (Table descriptions are listed at the bottom of the table)

| <b>Chr</b> | <b>Windows</b>    | <b><i>G.Soja</i><sub>SNP</sub>*</b> | <b>PI<sub>soja</sub>*</b> | <b><i>G.Max</i><sub>SNP</sub>*</b> | <b>PI<sub>Max</sub>*</b> | <b><math>\pi_{Max/Soja}</math>*</b> | <b>Gene id</b>         | <b>Gene name</b> |
|------------|-------------------|-------------------------------------|---------------------------|------------------------------------|--------------------------|-------------------------------------|------------------------|------------------|
| Chr01      | 36930001-36950000 | 730                                 | 0.00937337                | 398                                | 0.000528105              | 0.056340996                         | <i>Glyma.01G108200</i> | <i>GmLac1</i>    |
| Chr01      | 36940001-36960000 | 693                                 | 0.00658368                | 464                                | 0.000834595              | 0.126767249                         | <i>Glyma.01G108200</i> | <i>GmLac1</i>    |
| Chr01      | 36950001-36970000 | 614                                 | 0.00418733                | 453                                | 0.00104559               | 0.249703272                         | <i>Glyma.01G108200</i> | <i>GmLac1</i>    |
| Chr01      | 38350001-38370000 | 566                                 | 0.00527249                | 360                                | 0.00269323               | 0.510807986                         | <i>Glyma.01G112600</i> | <i>GmLac2</i>    |
| Chr01      | 38340001-38360000 | 624                                 | 0.00596893                | 416                                | 0.00235611               | 0.394729039                         | <i>Glyma.01G112600</i> | <i>GmLac2</i>    |
| Chr01      | 51030001-51050000 | 192                                 | 0.00143632                | 112                                | 0.00089814               | 0.625306338                         | <i>Glyma.01G173500</i> | <i>GmLac3</i>    |
| Chr01      | 51040001-51060000 | 291                                 | 0.00217039                | 150                                | 0.00151536               | 0.698197098                         | <i>Glyma.01G173500</i> | <i>GmLac3</i>    |
| Chr01      | 51040001-51060000 | 291                                 | 0.00217039                | 150                                | 0.00151536               | 0.698197098                         | <i>Glyma.01G173600</i> | <i>GmLac4</i>    |
| Chr01      | 51050001-51070000 | 313                                 | 0.00247773                | 161                                | 0.00146324               | 0.590556679                         | <i>Glyma.01G173600</i> | <i>GmLac4</i>    |
| Chr01      | 51830001-51850000 | 237                                 | 0.00226797                | 155                                | 0.00161155               | 0.710569364                         | <i>Glyma.01G183100</i> | <i>GmLac5</i>    |
| Chr01      | 51840001-51860000 | 307                                 | 0.00287032                | 186                                | 0.00205184               | 0.714847125                         | <i>Glyma.01G183100</i> | <i>GmLac5</i>    |
| Chr02      | 41210001-41230000 | 702                                 | 0.00623179                | 478                                | 0.00363794               | 0.583771276                         | <i>Glyma.02G224800</i> | <i>GmLac6</i>    |
| Chr02      | 41220001-41240000 | 526                                 | 0.00569231                | 354                                | 0.00385108               | 0.676540807                         | <i>Glyma.02G224800</i> | <i>GmLac6</i>    |
| Chr02      | 41880001-41900000 | 332                                 | 0.00329296                | 233                                | 0.000661599              | 0.20091316                          | <i>Glyma.02G231600</i> | <i>GmLac7</i>    |
| Chr02      | 41870001-41890000 | 450                                 | 0.00443845                | 279                                | 0.00109056               | 0.245707398                         | <i>Glyma.02G231600</i> | <i>GmLac7</i>    |
| Chr02      | 44740001-44760000 | 278                                 | 0.00226741                | 120                                | 0.000280899              | 0.123885402                         | <i>Glyma.02G261600</i> | <i>GmLac8</i>    |
| Chr02      | 44750001-44770000 | 395                                 | 0.00385523                | 217                                | 0.000843029              | 0.218671519                         | <i>Glyma.02G261600</i> | <i>GmLac8</i>    |
| Chr02      | 44760001-44780000 | 377                                 | 0.00379832                | 239                                | 0.000964546              | 0.253940163                         | <i>Glyma.02G261600</i> | <i>GmLac8</i>    |
| Chr03      | 19350001-19370000 | 547                                 | 0.00430366                | 388                                | 0.00300067               | 0.697236771                         | <i>Glyma.03G077900</i> | <i>GmLac9</i>    |
| Chr03      | 19360001-19380000 | 279                                 | 0.00257038                | 239                                | 0.00167205               | 0.650506929                         | <i>Glyma.03G077900</i> | <i>GmLac9</i>    |
| Chr04      | 1510001-1530000   | 366                                 | 0.00346365                | 160                                | 0.000843645              | 0.243571088                         | <i>Glyma.04G019500</i> | <i>GmLac10</i>   |
| Chr04      | 1520001-1540000   | 296                                 | 0.0024632                 | 125                                | 0.00073875               | 0.299914745                         | <i>Glyma.04G019500</i> | <i>GmLac10</i>   |
| Chr04      | 1530001-1550000   | 359                                 | 0.00287238                | 185                                | 0.00148012               | 0.515293937                         | <i>Glyma.04G019500</i> | <i>GmLac10</i>   |

|       |                   |     |            |     |             |             |                        |                |
|-------|-------------------|-----|------------|-----|-------------|-------------|------------------------|----------------|
| Chr04 | 14430001-14450000 | 502 | 0.00357429 | 364 | 0.00280357  | 0.784371162 | <i>Glyma.04G119600</i> | <i>GmLac11</i> |
| Chr04 | 14440001-14460000 | 455 | 0.0030526  | 384 | 0.00245702  | 0.804894189 | <i>Glyma.04G119600</i> | <i>GmLac11</i> |
| Chr05 | 5120001-5140000   | 529 | 0.00538196 | 302 | 0.00253696  | 0.471382173 | <i>Glyma.05G056100</i> | <i>GmLac12</i> |
| Chr05 | 5110001-5130000   | 495 | 0.0035485  | 175 | 0.000395522 | 0.111461744 | <i>Glyma.05G056100</i> | <i>GmLac12</i> |
| Chr05 | 13140001-13160000 | 478 | 0.00291806 | 307 | 0.000715739 | 0.245279055 | <i>Glyma.05G082700</i> | <i>GmLac13</i> |
| Chr05 | 13150001-13170000 | 387 | 0.00268302 | 223 | 0.000906046 | 0.337696327 | <i>Glyma.05G082700</i> | <i>GmLac13</i> |
| Chr05 | 13160001-13180000 | 390 | 0.00243363 | 232 | 0.000857239 | 0.352247055 | <i>Glyma.05G082700</i> | <i>GmLac13</i> |
| Chr06 | 1480001-1500000   | 260 | 0.00282996 | 176 | 0.00248023  | 0.876418748 | <i>Glyma.06G019800</i> | <i>GmLac14</i> |
| Chr06 | 1490001-1510000   | 310 | 0.00338772 | 182 | 0.00268794  | 0.793436293 | <i>Glyma.06G019800</i> | <i>GmLac14</i> |
| Chr06 | 1500001-1520000   | 493 | 0.00396918 | 234 | 0.00192551  | 0.485115313 | <i>Glyma.06G019800</i> | <i>GmLac14</i> |
| Chr06 | 47260001-47280000 | 611 | 0.00701206 | 484 | 0.00494092  | 0.704631734 | <i>Glyma.06G284300</i> | <i>GmLac15</i> |
| Chr06 | 47270001-47290000 | 488 | 0.00580068 | 381 | 0.00346475  | 0.597300661 | <i>Glyma.06G284300</i> | <i>GmLac15</i> |
| Chr06 | 49580001-49600000 | 427 | 0.00386868 | 271 | 0.00264424  | 0.683499281 | <i>Glyma.06G307100</i> | <i>GmLac16</i> |
| Chr06 | 49590001-49610000 | 440 | 0.00424575 | 292 | 0.00278352  | 0.655601484 | <i>Glyma.06G307100</i> | <i>GmLac16</i> |
| Chr06 | 50730001-50750000 | 355 | 0.00310356 | 268 | 0.00216819  | 0.69861385  | <i>Glyma.06G318800</i> | <i>GmLac17</i> |
| Chr06 | 50740001-50760000 | 301 | 0.00270298 | 190 | 0.001311    | 0.485020237 | <i>Glyma.06G318800</i> | <i>GmLac17</i> |
| Chr07 | 4720001-4740000   | 510 | 0.0038874  | 347 | 0.00136823  | 0.351965324 | <i>Glyma.07G054100</i> | <i>GmLac18</i> |
| Chr07 | 4730001-4750000   | 614 | 0.00566682 | 439 | 0.00230477  | 0.406713112 | <i>Glyma.07G054100</i> | <i>GmLac18</i> |
| Chr07 | 4730001-4750000   | 614 | 0.00566682 | 439 | 0.00230477  | 0.406713112 | <i>Glyma.07G054200</i> | <i>GmLac19</i> |
| Chr07 | 4740001-4760000   | 436 | 0.00465591 | 317 | 0.00213253  | 0.458026465 | <i>Glyma.07G054200</i> | <i>GmLac19</i> |
| Chr07 | 15850001-15870000 | 518 | 0.00498313 | 273 | 0.00334753  | 0.671772561 | <i>Glyma.07G133900</i> | <i>GmLac20</i> |
| Chr07 | 15860001-15880000 | 438 | 0.00455026 | 242 | 0.00310937  | 0.683338974 | <i>Glyma.07G133900</i> | <i>GmLac20</i> |
| Chr07 | 15870001-15890000 | 390 | 0.00390222 | 267 | 0.00291414  | 0.746790289 | <i>Glyma.07G133900</i> | <i>GmLac20</i> |
| Chr07 | 15870001-15890000 | 390 | 0.00390222 | 267 | 0.00291414  | 0.746790289 | <i>Glyma.07G134100</i> | <i>GmLac21</i> |
| Chr07 | 15880001-15900000 | 967 | 0.00961172 | 705 | 0.00672423  | 0.699586546 | <i>Glyma.07G134100</i> | <i>GmLac21</i> |
| Chr07 | 16910001-16930000 | 279 | 0.00213618 | 149 | 0.000867887 | 0.406279902 | <i>Glyma.07G142400</i> | <i>GmLac22</i> |

|       |                   |     |            |     |             |             |                        |                |
|-------|-------------------|-----|------------|-----|-------------|-------------|------------------------|----------------|
| Chr07 | 16920001-16940000 | 254 | 0.00226783 | 144 | 0.00103746  | 0.457468152 | <i>Glyma.07G142400</i> | <i>GmLac22</i> |
| Chr07 | 16930001-16950000 | 339 | 0.00498756 | 242 | 0.00399746  | 0.801486097 | <i>Glyma.07G142500</i> | <i>GmLac23</i> |
| Chr07 | 16910001-16930000 | 279 | 0.00213618 | 149 | 0.000867887 | 0.406279902 | <i>Glyma.07G142500</i> | <i>GmLac23</i> |
| Chr07 | 16920001-16940000 | 254 | 0.00226783 | 144 | 0.00103746  | 0.457468152 | <i>Glyma.07G142500</i> | <i>GmLac23</i> |
| Chr07 | 16960001-16980000 | 865 | 0.0100486  | 521 | 0.00588316  | 0.585470613 | <i>Glyma.07G142600</i> | <i>GmLac24</i> |
| Chr07 | 16970001-16990000 | 566 | 0.00572423 | 333 | 0.00353453  | 0.617468201 | <i>Glyma.07G142600</i> | <i>GmLac24</i> |
| Chr07 | 16980001-17000000 | 601 | 0.0045201  | 358 | 0.000637917 | 0.141128957 | <i>Glyma.07G142600</i> | <i>GmLac24</i> |
| Chr07 | 40230001-40250000 | 470 | 0.00386678 | 295 | 0.000500863 | 0.129529738 | <i>Glyma.07G225300</i> | <i>GmLac25</i> |
| Chr07 | 40220001-40240000 | 492 | 0.00421592 | 324 | 0.000593821 | 0.140852056 | <i>Glyma.07G225300</i> | <i>GmLac25</i> |
| Chr07 | 40240001-40260000 | 459 | 0.00426001 | 241 | 0.000766763 | 0.179990892 | <i>Glyma.07G225300</i> | <i>GmLac25</i> |
| Chr07 | 40230001-40250000 | 470 | 0.00386678 | 295 | 0.000500863 | 0.129529738 | <i>Glyma.07G225400</i> | <i>GmLac26</i> |
| Chr07 | 40250001-40270000 | 488 | 0.00485898 | 271 | 0.00083755  | 0.172371568 | <i>Glyma.07G225400</i> | <i>GmLac26</i> |
| Chr07 | 40240001-40260000 | 459 | 0.00426001 | 241 | 0.000766763 | 0.179990892 | <i>Glyma.07G225400</i> | <i>GmLac26</i> |
| Chr07 | 43670001-43690000 | 271 | 0.00269008 | 154 | 0.00134068  | 0.49837923  | <i>Glyma.07G261800</i> | <i>GmLac27</i> |
| Chr07 | 43660001-43680000 | 305 | 0.0027403  | 156 | 0.00057741  | 0.210710506 | <i>Glyma.07G261800</i> | <i>GmLac27</i> |
| Chr08 | 10620001-10640000 | 307 | 0.00344297 | 196 | 0.00235465  | 0.683900818 | <i>Glyma.08G138900</i> | <i>GmLac28</i> |
| Chr08 | 10630001-10650000 | 270 | 0.00319221 | 185 | 0.00216181  | 0.677214218 | <i>Glyma.08G138900</i> | <i>GmLac28</i> |
| Chr08 | 45860001-45880000 | 276 | 0.00243106 | 138 | 0.000398728 | 0.164014051 | <i>Glyma.08G343500</i> | <i>GmLac29</i> |
| Chr08 | 45870001-45890000 | 372 | 0.0029697  | 171 | 0.000863614 | 0.290808499 | <i>Glyma.08G343500</i> | <i>GmLac29</i> |
| Chr08 | 46650001-46670000 | 343 | 0.00277655 | 191 | 0.00148836  | 0.536046533 | <i>Glyma.08G353500</i> | <i>GmLac30</i> |
| Chr08 | 46660001-46680000 | 256 | 0.0019618  | 148 | 0.0012119   | 0.617749006 | <i>Glyma.08G353500</i> | <i>GmLac30</i> |
| Chr08 | 47090001-47110000 | 378 | 0.0040851  | 250 | 0.00232146  | 0.56827495  | <i>Glyma.08G359100</i> | <i>GmLac31</i> |
| Chr08 | 47100001-47120000 | 333 | 0.00289398 | 188 | 0.00104228  | 0.360154528 | <i>Glyma.08G359100</i> | <i>GmLac31</i> |
| Chr08 | 47110001-47130000 | 314 | 0.00270613 | 167 | 0.000849501 | 0.313917291 | <i>Glyma.08G359200</i> | <i>GmLac32</i> |
| Chr08 | 47100001-47120000 | 333 | 0.00289398 | 188 | 0.00104228  | 0.360154528 | <i>Glyma.08G359200</i> | <i>GmLac32</i> |
| Chr08 | 47110001-47130000 | 314 | 0.00270613 | 167 | 0.000849501 | 0.313917291 | <i>Glyma.08G359300</i> | <i>GmLac33</i> |

|       |                   |     |            |     |             |             |                        |                |
|-------|-------------------|-----|------------|-----|-------------|-------------|------------------------|----------------|
| Chr08 | 47100001-47120000 | 333 | 0.00289398 | 188 | 0.00104228  | 0.360154528 | <i>Glyma.08G359300</i> | <i>GmLac33</i> |
| Chr08 | 47120001-47140000 | 339 | 0.00336336 | 201 | 0.0013645   | 0.405695495 | <i>Glyma.08G359300</i> | <i>GmLac33</i> |
| Chr08 | 47110001-47130000 | 314 | 0.00270613 | 167 | 0.000849501 | 0.313917291 | <i>Glyma.08G359400</i> | <i>GmLac34</i> |
| Chr08 | 47120001-47140000 | 339 | 0.00336336 | 201 | 0.0013645   | 0.405695495 | <i>Glyma.08G359400</i> | <i>GmLac34</i> |
| Chr09 | 33010001-33030000 | 503 | 0.00509609 | 376 | 0.00176684  | 0.346705023 | <i>Glyma.09G132400</i> | <i>GmLac35</i> |
| Chr09 | 33000001-33020000 | 595 | 0.00428404 | 426 | 0.00187464  | 0.437586951 | <i>Glyma.09G132400</i> | <i>GmLac35</i> |
| Chr10 | 42850001-42870000 | 254 | 0.00180153 | 144 | 0.00107813  | 0.598452427 | <i>Glyma.10G197300</i> | <i>GmLac36</i> |
| Chr10 | 42860001-42880000 | 339 | 0.00321741 | 188 | 0.00183069  | 0.568994937 | <i>Glyma.10G197300</i> | <i>GmLac36</i> |
| Chr10 | 42840001-42860000 | 446 | 0.00429963 | 267 | 0.00137244  | 0.319199559 | <i>Glyma.10G197300</i> | <i>GmLac36</i> |
| Chr10 | 45090001-45110000 | 705 | 0.00695382 | 486 | 0.00215421  | 0.309788001 | <i>Glyma.10G219100</i> | <i>GmLac37</i> |
| Chr10 | 45080001-45100000 | 750 | 0.00747836 | 528 | 0.00246158  | 0.329160404 | <i>Glyma.10G219100</i> | <i>GmLac37</i> |
| Chr10 | 45100001-45120000 | 287 | 0.00264907 | 165 | 0.00127537  | 0.481440657 | <i>Glyma.10G219100</i> | <i>GmLac37</i> |
| Chr10 | 45090001-45110000 | 705 | 0.00695382 | 486 | 0.00215421  | 0.309788001 | <i>Glyma.10G219200</i> | <i>GmLac38</i> |
| Chr10 | 45100001-45120000 | 287 | 0.00264907 | 165 | 0.00127537  | 0.481440657 | <i>Glyma.10G219200</i> | <i>GmLac38</i> |
| Chr10 | 48790001-48810000 | 323 | 0.00305026 | 220 | 0.00179265  | 0.587703999 | <i>Glyma.10G263800</i> | <i>GmLac39</i> |
| Chr10 | 48800001-48820000 | 338 | 0.00279549 | 213 | 0.00153821  | 0.550247005 | <i>Glyma.10G263800</i> | <i>GmLac39</i> |
| Chr10 | 48810001-48830000 | 343 | 0.00258343 | 178 | 0.00131576  | 0.509307394 | <i>Glyma.10G263800</i> | <i>GmLac39</i> |
| Chr11 | 4460001-4480000   | 145 | 0.00131895 | 119 | 0.000702842 | 0.532879942 | <i>Glyma.11G059200</i> | <i>GmLac40</i> |
| Chr11 | 4470001-4490000   | 135 | 0.00104405 | 110 | 0.000547756 | 0.524645371 | <i>Glyma.11G059200</i> | <i>GmLac40</i> |
| Chr11 | 5230001-5250000   | 250 | 0.00251455 | 157 | 0.00134672  | 0.535570977 | <i>Glyma.11G069500</i> | <i>GmLac41</i> |
| Chr11 | 5220001-5240000   | 270 | 0.00279037 | 169 | 0.00107878  | 0.386608228 | <i>Glyma.11G069500</i> | <i>GmLac41</i> |
| Chr11 | 5230001-5250000   | 250 | 0.00251455 | 157 | 0.00134672  | 0.535570977 | <i>Glyma.11G069600</i> | <i>GmLac42</i> |
| Chr11 | 5240001-5260000   | 347 | 0.00331467 | 229 | 0.00217974  | 0.657603924 | <i>Glyma.11G069600</i> | <i>GmLac42</i> |
| Chr11 | 5220001-5240000   | 270 | 0.00279037 | 169 | 0.00107878  | 0.386608228 | <i>Glyma.11G069600</i> | <i>GmLac42</i> |
| Chr11 | 7410001-7430000   | 549 | 0.00510391 | 354 | 0.00265393  | 0.51997978  | <i>Glyma.11G097300</i> | <i>GmLac43</i> |
| Chr11 | 7420001-7440000   | 465 | 0.00417178 | 280 | 0.00229188  | 0.549377005 | <i>Glyma.11G097300</i> | <i>GmLac43</i> |



|       |                   |      |            |      |             |             |                        |                |
|-------|-------------------|------|------------|------|-------------|-------------|------------------------|----------------|
| Chr11 | 7430001-7450000   | 289  | 0.00183421 | 156  | 0.00111708  | 0.609025139 | <i>Glyma.11G097300</i> | <i>GmLac43</i> |
| Chr11 | 10440001-10460000 | 283  | 0.00222294 | 140  | 0.000516469 | 0.232336005 | <i>Glyma.11G137500</i> | <i>GmLac44</i> |
| Chr11 | 10450001-10470000 | 355  | 0.00325268 | 222  | 0.000949166 | 0.291810446 | <i>Glyma.11G137500</i> | <i>GmLac44</i> |
| Chr11 | 10460001-10480000 | 431  | 0.00355691 | 293  | 0.00126857  | 0.356649451 | <i>Glyma.11G137500</i> | <i>GmLac44</i> |
| Chr11 | 15440001-15460000 | 741  | 0.00500975 | 608  | 0.00235974  | 0.471029492 | <i>Glyma.11G164000</i> | <i>GmLac45</i> |
| Chr11 | 15430001-15450000 | 378  | 0.00287292 | 256  | 0.000932625 | 0.324626164 | <i>Glyma.11G164000</i> | <i>GmLac45</i> |
| Chr11 | 32870001-32890000 | 409  | 0.00435149 | 200  | 0.00096279  | 0.221255248 | <i>Glyma.11G233400</i> | <i>GmLac46</i> |
| Chr11 | 32860001-32880000 | 372  | 0.00425862 | 148  | 0.00104086  | 0.244412509 | <i>Glyma.11G233400</i> | <i>GmLac46</i> |
| Chr11 | 33140001-33160000 | 354  | 0.00330338 | 238  | 0.00225278  | 0.681962112 | <i>Glyma.11G236800</i> | <i>GmLac47</i> |
| Chr11 | 33150001-33170000 | 364  | 0.00330163 | 221  | 0.00301466  | 0.913082326 | <i>Glyma.11G236800</i> | <i>GmLac47</i> |
| Chr11 | 33160001-33180000 | 349  | 0.00355064 | 227  | 0.00267211  | 0.752571367 | <i>Glyma.11G236800</i> | <i>GmLac47</i> |
| Chr11 | 34620001-34640000 | 359  | 0.00252409 | 235  | 0.00184832  | 0.732271829 | <i>Glyma.11G256700</i> | <i>GmLac48</i> |
| Chr11 | 34630001-34650000 | 292  | 0.00200657 | 183  | 0.00136604  | 0.680783626 | <i>Glyma.11G256700</i> | <i>GmLac48</i> |
| Chr11 | 34640001-34660000 | 188  | 0.00110141 | 105  | 0.000870653 | 0.790489464 | <i>Glyma.11G256700</i> | <i>GmLac48</i> |
| Chr12 | 1710001-1730000   | 445  | 0.00485299 | 342  | 0.0015344   | 0.316176213 | <i>Glyma.12G023300</i> | <i>GmLac49</i> |
| Chr12 | 1700001-1720000   | 493  | 0.00494105 | 354  | 0.00162522  | 0.32892199  | <i>Glyma.12G023300</i> | <i>GmLac49</i> |
| Chr12 | 4410001-4430000   | 449  | 0.00551803 | 322  | 0.000902936 | 0.163633761 | <i>Glyma.12G060900</i> | <i>GmLac50</i> |
| Chr12 | 4420001-4440000   | 410  | 0.00380713 | 287  | 0.0007855   | 0.206323398 | <i>Glyma.12G060900</i> | <i>GmLac50</i> |
| Chr12 | 8390001-8410000   | 355  | 0.0033349  | 229  | 0.000780431 | 0.234019311 | <i>Glyma.12G097700</i> | <i>GmLac51</i> |
| Chr12 | 8380001-8400000   | 441  | 0.00432698 | 285  | 0.00132986  | 0.307341379 | <i>Glyma.12G097700</i> | <i>GmLac51</i> |
| Chr12 | 13080001-13100000 | 874  | 0.00803301 | 554  | 0.000428107 | 0.053293473 | <i>Glyma.12G121700</i> | <i>GmLac52</i> |
| Chr12 | 13090001-13110000 | 525  | 0.00426974 | 296  | 0.000352186 | 0.082484179 | <i>Glyma.12G121700</i> | <i>GmLac52</i> |
| Chr12 | 35430001-35450000 | 632  | 0.00649206 | 409  | 0.00109204  | 0.168211631 | <i>Glyma.12G192800</i> | <i>GmLac53</i> |
| Chr12 | 35420001-35440000 | 350  | 0.00291273 | 262  | 0.00135502  | 0.465206181 | <i>Glyma.12G192800</i> | <i>GmLac53</i> |
| Chr13 | 10560001-10580000 | 1848 | 0.0124698  | 1507 | 0.0106516   | 0.854191727 | <i>Glyma.13G033600</i> | <i>GmLac54</i> |
| Chr13 | 10570001-10590000 | 1157 | 0.00684365 | 936  | 0.00591123  | 0.863753991 | <i>Glyma.13G033600</i> | <i>GmLac54</i> |

|       |                   |     |            |     |             |             |                        |                |
|-------|-------------------|-----|------------|-----|-------------|-------------|------------------------|----------------|
| Chr13 | 18180001-18200000 | 263 | 0.00190207 | 192 | 0.00222595  | 1.170277645 | <i>Glyma.13G076900</i> | <i>GmLac55</i> |
| Chr13 | 18190001-18210000 | 357 | 0.00265    | 249 | 0.00274509  | 1.035883019 | <i>Glyma.13G076900</i> | <i>GmLac55</i> |
| Chr13 | 18200001-18220000 | 408 | 0.0028123  | 251 | 0.00231536  | 0.823297657 | <i>Glyma.13G076900</i> | <i>GmLac55</i> |
| Chr13 | 43080001-43100000 | 379 | 0.00328336 | 160 | 8.81E-05    | 0.026819021 | <i>Glyma.13G338100</i> | <i>GmLac56</i> |
| Chr13 | 43090001-43110000 | 451 | 0.00408431 | 204 | 0.000243096 | 0.059519478 | <i>Glyma.13G338100</i> | <i>GmLac56</i> |
| Chr13 | 43070001-43090000 | 479 | 0.00487904 | 228 | 0.000303264 | 0.06215649  | <i>Glyma.13G338100</i> | <i>GmLac56</i> |
| Chr14 | 3100001-3120000   | 555 | 0.00491879 | 416 | 0.00338755  | 0.688695797 | <i>Glyma.14G041300</i> | <i>GmLac57</i> |
| Chr14 | 3110001-3130000   | 524 | 0.00378197 | 353 | 0.00277474  | 0.733675836 | <i>Glyma.14G041300</i> | <i>GmLac57</i> |
| Chr14 | 3120001-3140000   | 516 | 0.003948   | 368 | 0.00295316  | 0.748014184 | <i>Glyma.14G041300</i> | <i>GmLac57</i> |
| Chr14 | 4440001-4460000   | 561 | 0.0049094  | 289 | 0.00250333  | 0.509905487 | <i>Glyma.14G056100</i> | <i>GmLac58</i> |
| Chr14 | 4450001-4470000   | 302 | 0.00319218 | 176 | 0.00165413  | 0.518181932 | <i>Glyma.14G056100</i> | <i>GmLac58</i> |
| Chr14 | 5060001-5080000   | 332 | 0.00321653 | 148 | 0.00121231  | 0.376899951 | <i>Glyma.14G062300</i> | <i>GmLac59</i> |
| Chr14 | 5070001-5090000   | 291 | 0.00275641 | 148 | 0.00110385  | 0.400466549 | <i>Glyma.14G062300</i> | <i>GmLac59</i> |
| Chr14 | 45600001-45620000 | 810 | 0.00750269 | 436 | 0.00255954  | 0.341149641 | <i>Glyma.14G191500</i> | <i>GmLac60</i> |
| Chr14 | 45610001-45630000 | 493 | 0.00614782 | 327 | 0.00320318  | 0.521026966 | <i>Glyma.14G191500</i> | <i>GmLac60</i> |
| Chr14 | 45620001-45640000 | 331 | 0.00411562 | 204 | 0.00171467  | 0.416624956 | <i>Glyma.14G191500</i> | <i>GmLac60</i> |
| Chr14 | 46390001-46410000 | 287 | 0.00271051 | 191 | 0.001736    | 0.640469875 | <i>Glyma.14G198900</i> | <i>GmLac61</i> |
| Chr14 | 46400001-46420000 | 305 | 0.00258147 | 210 | 0.00177316  | 0.686879956 | <i>Glyma.14G198900</i> | <i>GmLac61</i> |
| Chr14 | 48800001-48820000 | 351 | 0.00259067 | 157 | 0.000640116 | 0.247085117 | <i>Glyma.14G223000</i> | <i>GmLac62</i> |
| Chr14 | 48810001-48830000 | 399 | 0.00343652 | 228 | 0.00120776  | 0.351448558 | <i>Glyma.14G223000</i> | <i>GmLac62</i> |
| Chr15 | 8550001-8570000   | 236 | 0.00160515 | 137 | 0.00135349  | 0.843217145 | <i>Glyma.15G109000</i> | <i>GmLac63</i> |
| Chr15 | 8560001-8580000   | 320 | 0.00212594 | 202 | 0.00170451  | 0.801767689 | <i>Glyma.15G109000</i> | <i>GmLac63</i> |
| Chr16 | 31860001-31880000 | 425 | 0.00409214 | 357 | 0.00289503  | 0.707461133 | <i>Glyma.16G158400</i> | <i>GmLac64</i> |
| Chr16 | 31850001-31870000 | 548 | 0.00510888 | 409 | 0.00309077  | 0.604979956 | <i>Glyma.16G158400</i> | <i>GmLac64</i> |
| Chr17 | 940001-960000     | 313 | 0.00311104 | 212 | 0.000907682 | 0.291761597 | <i>Glyma.17G012300</i> | <i>GmLac65</i> |
| Chr17 | 950001-970000     | 422 | 0.00324871 | 228 | 0.000965743 | 0.297269686 | <i>Glyma.17G012300</i> | <i>GmLac65</i> |

|       |                   |     |            |     |             |             |                        |                |
|-------|-------------------|-----|------------|-----|-------------|-------------|------------------------|----------------|
| Chr17 | 11170001-11190000 | 442 | 0.0040206  | 227 | 0.000447539 | 0.111311496 | <i>Glyma.17G138300</i> | <i>GmLac66</i> |
| Chr17 | 11180001-11200000 | 615 | 0.00580905 | 373 | 0.00260572  | 0.448562157 | <i>Glyma.17G138300</i> | <i>GmLac66</i> |
| Chr17 | 20470001-20490000 | 405 | 0.0019947  | 244 | 0.00154802  | 0.776066576 | <i>Glyma.17G180400</i> | <i>GmLac67</i> |
| Chr17 | 20480001-20500000 | 308 | 0.00144083 | 172 | 0.00125822  | 0.873260551 | <i>Glyma.17G180400</i> | <i>GmLac67</i> |
| Chr17 | 20490001-20510000 | 207 | 0.00107763 | 106 | 0.000941892 | 0.874040255 | <i>Glyma.17G180400</i> | <i>GmLac67</i> |
| Chr17 | 20560001-20580000 | 389 | 0.00214242 | 254 | 0.00241208  | 1.12586701  | <i>Glyma.17G180500</i> | <i>GmLac68</i> |
| Chr17 | 20570001-20590000 | 247 | 0.00146068 | 129 | 0.00139393  | 0.954302106 | <i>Glyma.17G180500</i> | <i>GmLac68</i> |
| Chr17 | 20580001-20600000 | 270 | 0.00164753 | 160 | 0.00146461  | 0.88897319  | <i>Glyma.17G180500</i> | <i>GmLac68</i> |
| Chr17 | 41530001-41550000 | 239 | 0.00206636 | 101 | 0.000372189 | 0.180118179 | <i>Glyma.17G261500</i> | <i>GmLac69</i> |
| Chr17 | 41520001-41540000 | 254 | 0.00190624 | 99  | 0.000424839 | 0.22286753  | <i>Glyma.17G261500</i> | <i>GmLac69</i> |
| Chr17 | 41510001-41530000 | 247 | 0.00132044 | 87  | 0.000539798 | 0.408801612 | <i>Glyma.17G261500</i> | <i>GmLac69</i> |
| Chr18 | 1710001-1730000   | 264 | 0.00266594 | 212 | 0.00174438  | 0.654320802 | <i>Glyma.18G023600</i> | <i>GmLac70</i> |
| Chr18 | 1720001-1740000   | 346 | 0.00322403 | 263 | 0.00234196  | 0.726407633 | <i>Glyma.18G023600</i> | <i>GmLac70</i> |
| Chr18 | 5030001-5050000   | 613 | 0.00412119 | 354 | 0.00310039  | 0.752304553 | <i>Glyma.18G057200</i> | <i>GmLac71</i> |
| Chr18 | 5040001-5060000   | 268 | 0.00212393 | 153 | 0.00168963  | 0.795520568 | <i>Glyma.18G057200</i> | <i>GmLac71</i> |
| Chr18 | 5910001-5930000   | 280 | 0.00272068 | 191 | 0.000441346 | 0.162219004 | <i>Glyma.18G065100</i> | <i>GmLac72</i> |
| Chr18 | 5920001-5940000   | 669 | 0.00605375 | 468 | 0.0011853   | 0.195795994 | <i>Glyma.18G065100</i> | <i>GmLac72</i> |
| Chr18 | 5930001-5950000   | 538 | 0.00459581 | 381 | 0.00107244  | 0.233351683 | <i>Glyma.18G065100</i> | <i>GmLac72</i> |
| Chr18 | 42230001-42250000 | 556 | 0.00736779 | 462 | 0.00633248  | 0.859481608 | <i>Glyma.18G177200</i> | <i>GmLac73</i> |
| Chr18 | 42240001-42260000 | 216 | 0.00287478 | 188 | 0.00258714  | 0.899943648 | <i>Glyma.18G177200</i> | <i>GmLac73</i> |
| Chr18 | 42240001-42260000 | 216 | 0.00287478 | 188 | 0.00258714  | 0.899943648 | <i>Glyma.18G177300</i> | <i>GmLac74</i> |
| Chr18 | 42250001-42270000 | 564 | 0.00722949 | 502 | 0.00770216  | 1.065380822 | <i>Glyma.18G177300</i> | <i>GmLac74</i> |
| Chr18 | 42310001-42330000 | 310 | 0.00347424 | 247 | 0.00304669  | 0.876937114 | <i>Glyma.18G177400</i> | <i>GmLac75</i> |
| Chr18 | 42320001-42340000 | 677 | 0.005518   | 569 | 0.00439041  | 0.79565241  | <i>Glyma.18G177400</i> | <i>GmLac75</i> |
| Chr18 | 44250001-44270000 | 435 | 0.00491061 | 330 | 0.00125107  | 0.254768756 | <i>Glyma.18G183500</i> | <i>GmLac76</i> |
| Chr18 | 44260001-44280000 | 377 | 0.00378138 | 261 | 0.00106101  | 0.280588039 | <i>Glyma.18G183500</i> | <i>GmLac76</i> |

|       |                   |      |            |     |             |             |                        |                |
|-------|-------------------|------|------------|-----|-------------|-------------|------------------------|----------------|
| Chr18 | 44260001-44280000 | 377  | 0.00378138 | 261 | 0.00106101  | 0.280588039 | <i>Glyma.18G183700</i> | <i>GmLac77</i> |
| Chr18 | 44270001-44290000 | 496  | 0.00372776 | 505 | 0.00214457  | 0.575297229 | <i>Glyma.18G183700</i> | <i>GmLac77</i> |
| Chr18 | 46540001-46560000 | 878  | 0.00853125 | 687 | 0.00211755  | 0.248210989 | <i>Glyma.18G193200</i> | <i>GmLac78</i> |
| Chr18 | 46550001-46570000 | 932  | 0.00884977 | 724 | 0.00254434  | 0.287503517 | <i>Glyma.18G193200</i> | <i>GmLac78</i> |
| Chr18 | 46560001-46580000 | 774  | 0.00745971 | 622 | 0.0021778   | 0.291941644 | <i>Glyma.18G193200</i> | <i>GmLac78</i> |
| Chr18 | 46570001-46590000 | 440  | 0.00411183 | 354 | 0.0011781   | 0.286514763 | <i>Glyma.18G193300</i> | <i>GmLac79</i> |
| Chr18 | 46560001-46580000 | 774  | 0.00745971 | 622 | 0.0021778   | 0.291941644 | <i>Glyma.18G193300</i> | <i>GmLac79</i> |
| Chr18 | 46580001-46600000 | 391  | 0.00258966 | 267 | 0.00100892  | 0.389595545 | <i>Glyma.18G193300</i> | <i>GmLac79</i> |
| Chr18 | 46610001-46630000 | 949  | 0.00618184 | 671 | 0.00184881  | 0.29907115  | <i>Glyma.18G193400</i> | <i>GmLac80</i> |
| Chr18 | 46620001-46640000 | 937  | 0.00866634 | 738 | 0.00275146  | 0.317488121 | <i>Glyma.18G193400</i> | <i>GmLac80</i> |
| Chr18 | 47370001-47390000 | 946  | 0.00774244 | 688 | 0.0035964   | 0.46450473  | <i>Glyma.18G197400</i> | <i>GmLac81</i> |
| Chr18 | 47360001-47380000 | 819  | 0.0058289  | 598 | 0.00294412  | 0.505090154 | <i>Glyma.18G197400</i> | <i>GmLac81</i> |
| Chr20 | 2740001-2760000   | 472  | 0.00372635 | 316 | 0.00132037  | 0.354333329 | <i>Glyma.20G025200</i> | <i>GmLac82</i> |
| Chr20 | 2730001-2750000   | 498  | 0.00414326 | 338 | 0.00155725  | 0.375851383 | <i>Glyma.20G025200</i> | <i>GmLac82</i> |
| Chr20 | 11610001-11630000 | 954  | 0.00649227 | 594 | 0.000986528 | 0.151954247 | <i>Glyma.20G051600</i> | <i>GmLac83</i> |
| Chr20 | 11620001-11640000 | 1077 | 0.00775181 | 716 | 0.00204658  | 0.264013179 | <i>Glyma.20G051600</i> | <i>GmLac83</i> |
| Chr20 | 11680001-11700000 | 444  | 0.00396309 | 248 | 0.000137896 | 0.034795072 | <i>Glyma.20G051700</i> | <i>GmLac84</i> |
| Chr20 | 11690001-11710000 | 287  | 0.00201797 | 155 | 0.000269759 | 0.1336784   | <i>Glyma.20G051700</i> | <i>GmLac84</i> |
| Chr20 | 11670001-11690000 | 972  | 0.0100248  | 626 | 0.00140258  | 0.139911021 | <i>Glyma.20G051700</i> | <i>GmLac84</i> |
| Chr20 | 11750001-11770000 | 786  | 0.00525711 | 394 | 0.000586574 | 0.111577273 | <i>Glyma.20G051900</i> | <i>GmLac85</i> |
| Chr20 | 11760001-11780000 | 480  | 0.00297301 | 240 | 0.000383626 | 0.129036229 | <i>Glyma.20G051900</i> | <i>GmLac85</i> |
| Chr20 | 11770001-11790000 | 370  | 0.00230645 | 160 | 0.000663046 | 0.287474691 | <i>Glyma.20G051900</i> | <i>GmLac85</i> |
| Chr20 | 36850001-36870000 | 560  | 0.00564491 | 419 | 0.00359228  | 0.636375071 | <i>Glyma.20G126500</i> | <i>GmLac86</i> |
| Chr20 | 36860001-36880000 | 573  | 0.00534109 | 405 | 0.00347716  | 0.651020672 | <i>Glyma.20G126500</i> | <i>GmLac86</i> |
| Chr20 | 41000001-41020000 | 324  | 0.00331727 | 254 | 0.0011142   | 0.335878599 | <i>Glyma.20G172600</i> | <i>GmLac87</i> |
| Chr20 | 41010001-41030000 | 317  | 0.00222603 | 228 | 0.00115539  | 0.519036132 | <i>Glyma.20G172600</i> | <i>GmLac87</i> |

|       |                   |     |            |     |            |             |                        |                |
|-------|-------------------|-----|------------|-----|------------|-------------|------------------------|----------------|
| Chr20 | 41020001-41040000 | 426 | 0.0029295  | 256 | 0.00134993 | 0.460805598 | <i>Glyma.20G172600</i> | <i>GmLac87</i> |
| Chr20 | 41010001-41030000 | 317 | 0.00222603 | 228 | 0.00115539 | 0.519036132 | <i>Glyma.20G172700</i> | <i>GmLac88</i> |
| Chr20 | 41020001-41040000 | 426 | 0.0029295  | 256 | 0.00134993 | 0.460805598 | <i>Glyma.20G172700</i> | <i>GmLac88</i> |
| Chr20 | 43170001-43190000 | 309 | 0.0035503  | 223 | 0.00278231 | 0.783683069 | <i>Glyma.20G192800</i> | <i>GmLac89</i> |
| Chr20 | 43180001-43200000 | 348 | 0.00374143 | 223 | 0.00270431 | 0.722801175 | <i>Glyma.20G192800</i> | <i>GmLac89</i> |
| Chr20 | 43190001-43210000 | 351 | 0.00368865 | 223 | 0.00169007 | 0.458181177 | <i>Glyma.20G192800</i> | <i>GmLac89</i> |
| Chr20 | 43180001-43200000 | 348 | 0.00374143 | 223 | 0.00270431 | 0.722801175 | <i>Glyma.20G192900</i> | <i>GmLac90</i> |
| Chr20 | 43190001-43210000 | 351 | 0.00368865 | 223 | 0.00169007 | 0.458181177 | <i>Glyma.20G192900</i> | <i>GmLac90</i> |

**Table S9a - latter half. Sliding window analysis of nucleotide diversity of 93 laccase gene sequence.** (Table descriptions are listed at the bottom of the table)

| Gene id                | Gene name     | Physical location* | Overlap* | chr_Mean ( $\pi_{Max/Soja}$ )* | $\Delta \pi_{Ratio}$ * |
|------------------------|---------------|--------------------|----------|--------------------------------|------------------------|
| <i>Glyma.01G108200</i> | <i>GmLac1</i> | 36947944-36957036  | 2056     | 0.460792348                    | -0.404451352           |
| <i>Glyma.01G108200</i> | <i>GmLac1</i> | 36947944-36957036  | 9092     | 0.460792348                    | -0.334025099           |
| <i>Glyma.01G108200</i> | <i>GmLac1</i> | 36947944-36957036  | 7035     | 0.460792348                    | -0.211089076           |
| <i>Glyma.01G112600</i> | <i>GmLac2</i> | 38353594-38358163  | 4569     | 0.460792348                    | 0.050015638            |
| <i>Glyma.01G112600</i> | <i>GmLac2</i> | 38353594-38358163  | 4569     | 0.460792348                    | -0.066063309           |
| <i>Glyma.01G173500</i> | <i>GmLac3</i> | 51045827-51048552  | 2725     | 0.460792348                    | 0.16451399             |
| <i>Glyma.01G173500</i> | <i>GmLac3</i> | 51045827-51048552  | 2725     | 0.460792348                    | 0.23740475             |
| <i>Glyma.01G173600</i> | <i>GmLac4</i> | 51051683-51054726  | 3043     | 0.460792348                    | 0.23740475             |
| <i>Glyma.01G173600</i> | <i>GmLac4</i> | 51051683-51054726  | 3043     | 0.460792348                    | 0.129764331            |
| <i>Glyma.01G183100</i> | <i>GmLac5</i> | 51843424-51847358  | 3934     | 0.460792348                    | 0.249777016            |
| <i>Glyma.01G183100</i> | <i>GmLac5</i> | 51843424-51847358  | 3934     | 0.460792348                    | 0.254054777            |
| <i>Glyma.02G224800</i> | <i>GmLac6</i> | 41222747-41227060  | 4313     | 0.507494768                    | 0.076276508            |
| <i>Glyma.02G224800</i> | <i>GmLac6</i> | 41222747-41227060  | 4313     | 0.507494768                    | 0.169046039            |
| <i>Glyma.02G231600</i> | <i>GmLac7</i> | 41882853-41885826  | 2973     | 0.507494768                    | -0.306581608           |

|                        |                |                   |      |             |              |
|------------------------|----------------|-------------------|------|-------------|--------------|
| <i>Glyma.02G231600</i> | <i>GmLac7</i>  | 41882853-41885826 | 2973 | 0.507494768 | -0.26178737  |
| <i>Glyma.02G261600</i> | <i>GmLac8</i>  | 44758969-44763198 | 1031 | 0.507494768 | -0.383609366 |
| <i>Glyma.02G261600</i> | <i>GmLac8</i>  | 44758969-44763198 | 4229 | 0.507494768 | -0.288823249 |
| <i>Glyma.02G261600</i> | <i>GmLac8</i>  | 44758969-44763198 | 3197 | 0.507494768 | -0.253554605 |
| <i>Glyma.03G077900</i> | <i>GmLac9</i>  | 19361933-19366381 | 4448 | 0.594576536 | 0.102660235  |
| <i>Glyma.03G077900</i> | <i>GmLac9</i>  | 19361933-19366381 | 4448 | 0.594576536 | 0.055930393  |
| <i>Glyma.04G019500</i> | <i>GmLac10</i> | 1525860-1533999   | 4140 | 0.543613008 | -0.30004192  |
| <i>Glyma.04G019500</i> | <i>GmLac10</i> | 1525860-1533999   | 8139 | 0.543613008 | -0.243698263 |
| <i>Glyma.04G019500</i> | <i>GmLac10</i> | 1525860-1533999   | 3998 | 0.543613008 | -0.028319071 |
| <i>Glyma.04G119600</i> | <i>GmLac11</i> | 14443110-14447983 | 4873 | 0.543613008 | 0.240758154  |
| <i>Glyma.04G119600</i> | <i>GmLac11</i> | 14443110-14447983 | 4873 | 0.543613008 | 0.261281181  |
| <i>Glyma.05G056100</i> | <i>GmLac12</i> | 5123859-5128473   | 4614 | 0.378758439 | 0.092623734  |
| <i>Glyma.05G056100</i> | <i>GmLac12</i> | 5123859-5128473   | 4614 | 0.378758439 | -0.267296695 |
| <i>Glyma.05G082700</i> | <i>GmLac13</i> | 13157352-13160970 | 2648 | 0.378758439 | -0.133479384 |
| <i>Glyma.05G082700</i> | <i>GmLac13</i> | 13157352-13160970 | 3618 | 0.378758439 | -0.041062112 |
| <i>Glyma.05G082700</i> | <i>GmLac13</i> | 13157352-13160970 | 969  | 0.378758439 | -0.026511384 |
| <i>Glyma.06G019800</i> | <i>GmLac14</i> | 1494230-1501925   | 5770 | 0.567000154 | 0.309418594  |
| <i>Glyma.06G019800</i> | <i>GmLac14</i> | 1494230-1501925   | 7695 | 0.567000154 | 0.226436139  |
| <i>Glyma.06G019800</i> | <i>GmLac14</i> | 1494230-1501925   | 1924 | 0.567000154 | -0.081884841 |
| <i>Glyma.06G284300</i> | <i>GmLac15</i> | 47271762-47274605 | 2843 | 0.567000154 | 0.13763158   |
| <i>Glyma.06G284300</i> | <i>GmLac15</i> | 47271762-47274605 | 2843 | 0.567000154 | 0.030300507  |
| <i>Glyma.06G307100</i> | <i>GmLac16</i> | 49594181-49599176 | 4995 | 0.567000154 | 0.116499127  |
| <i>Glyma.06G307100</i> | <i>GmLac16</i> | 49594181-49599176 | 4995 | 0.567000154 | 0.08860133   |
| <i>Glyma.06G318800</i> | <i>GmLac17</i> | 50742178-50747062 | 4884 | 0.567000154 | 0.131613696  |
| <i>Glyma.06G318800</i> | <i>GmLac17</i> | 50742178-50747062 | 4884 | 0.567000154 | -0.081979917 |
| <i>Glyma.07G054100</i> | <i>GmLac18</i> | 4733502-4736103   | 2601 | 0.468204013 | -0.116238689 |

|                        |                |                   |      |             |              |
|------------------------|----------------|-------------------|------|-------------|--------------|
| <i>Glyma.07G054100</i> | <i>GmLac18</i> | 4733502-4736103   | 2601 | 0.468204013 | -0.061490901 |
| <i>Glyma.07G054200</i> | <i>GmLac19</i> | 4742597-4747000   | 4403 | 0.468204013 | -0.061490901 |
| <i>Glyma.07G054200</i> | <i>GmLac19</i> | 4742597-4747000   | 4403 | 0.468204013 | -0.010177548 |
| <i>Glyma.07G133900</i> | <i>GmLac20</i> | 15868910-15873228 | 1090 | 0.468204013 | 0.203568548  |
| <i>Glyma.07G133900</i> | <i>GmLac20</i> | 15868910-15873228 | 4318 | 0.468204013 | 0.215134961  |
| <i>Glyma.07G133900</i> | <i>GmLac20</i> | 15868910-15873228 | 3227 | 0.468204013 | 0.278586276  |
| <i>Glyma.07G134100</i> | <i>GmLac21</i> | 15880168-15883379 | 3211 | 0.468204013 | 0.278586276  |
| <i>Glyma.07G134100</i> | <i>GmLac21</i> | 15880168-15883379 | 3211 | 0.468204013 | 0.231382533  |
| <i>Glyma.07G142400</i> | <i>GmLac22</i> | 16921847-16926142 | 4295 | 0.468204013 | -0.061924111 |
| <i>Glyma.07G142400</i> | <i>GmLac22</i> | 16921847-16926142 | 4295 | 0.468204013 | -0.010735861 |
| <i>Glyma.07G142500</i> | <i>GmLac23</i> | 16929178-16933812 | 3811 | 0.468204013 | 0.333282084  |
| <i>Glyma.07G142500</i> | <i>GmLac23</i> | 16929178-16933812 | 822  | 0.468204013 | -0.061924111 |
| <i>Glyma.07G142500</i> | <i>GmLac23</i> | 16929178-16933812 | 4634 | 0.468204013 | -0.010735861 |
| <i>Glyma.07G142600</i> | <i>GmLac24</i> | 16975838-16981175 | 4162 | 0.468204013 | 0.1172666    |
| <i>Glyma.07G142600</i> | <i>GmLac24</i> | 16975838-16981175 | 5337 | 0.468204013 | 0.149264188  |
| <i>Glyma.07G142600</i> | <i>GmLac24</i> | 16975838-16981175 | 1174 | 0.468204013 | -0.327075056 |
| <i>Glyma.07G225300</i> | <i>GmLac25</i> | 40239363-40241517 | 2154 | 0.468204013 | -0.338674275 |
| <i>Glyma.07G225300</i> | <i>GmLac25</i> | 40239363-40241517 | 637  | 0.468204013 | -0.327351957 |
| <i>Glyma.07G225300</i> | <i>GmLac25</i> | 40239363-40241517 | 1516 | 0.468204013 | -0.288213121 |
| <i>Glyma.07G225400</i> | <i>GmLac26</i> | 40248750-40251212 | 1250 | 0.468204013 | -0.338674275 |
| <i>Glyma.07G225400</i> | <i>GmLac26</i> | 40248750-40251212 | 1211 | 0.468204013 | -0.295832445 |
| <i>Glyma.07G225400</i> | <i>GmLac26</i> | 40248750-40251212 | 2462 | 0.468204013 | -0.288213121 |
| <i>Glyma.07G261800</i> | <i>GmLac27</i> | 43671355-43676147 | 4792 | 0.468204013 | 0.030175217  |
| <i>Glyma.07G261800</i> | <i>GmLac27</i> | 43671355-43676147 | 4792 | 0.468204013 | -0.257493507 |
| <i>Glyma.08G138900</i> | <i>GmLac28</i> | 10636329-10638034 | 1705 | 0.431595212 | 0.252305606  |
| <i>Glyma.08G138900</i> | <i>GmLac28</i> | 10636329-10638034 | 1705 | 0.431595212 | 0.245619006  |

|                        |                |                   |      |             |              |
|------------------------|----------------|-------------------|------|-------------|--------------|
| <i>Glyma.08G343500</i> | <i>GmLac29</i> | 45872298-45879050 | 6752 | 0.431595212 | -0.267581161 |
| <i>Glyma.08G343500</i> | <i>GmLac29</i> | 45872298-45879050 | 6752 | 0.431595212 | -0.140786713 |
| <i>Glyma.08G353500</i> | <i>GmLac30</i> | 46665729-46668560 | 2831 | 0.431595212 | 0.104451321  |
| <i>Glyma.08G353500</i> | <i>GmLac30</i> | 46665729-46668560 | 2831 | 0.431595212 | 0.186153794  |
| <i>Glyma.08G359100</i> | <i>GmLac31</i> | 47105388-47108727 | 3339 | 0.431595212 | 0.136679738  |
| <i>Glyma.08G359100</i> | <i>GmLac31</i> | 47105388-47108727 | 3339 | 0.431595212 | -0.071440684 |
| <i>Glyma.08G359200</i> | <i>GmLac32</i> | 47112555-47115278 | 2723 | 0.431595212 | -0.117677921 |
| <i>Glyma.08G359200</i> | <i>GmLac32</i> | 47112555-47115278 | 2723 | 0.431595212 | -0.071440684 |
| <i>Glyma.08G359300</i> | <i>GmLac33</i> | 47117261-47120794 | 3533 | 0.431595212 | -0.117677921 |
| <i>Glyma.08G359300</i> | <i>GmLac33</i> | 47117261-47120794 | 2739 | 0.431595212 | -0.071440684 |
| <i>Glyma.08G359300</i> | <i>GmLac33</i> | 47117261-47120794 | 793  | 0.431595212 | -0.025899717 |
| <i>Glyma.08G359400</i> | <i>GmLac34</i> | 47124368-47126962 | 2594 | 0.431595212 | -0.117677921 |
| <i>Glyma.08G359400</i> | <i>GmLac34</i> | 47124368-47126962 | 2594 | 0.431595212 | -0.025899717 |
| <i>Glyma.09G132400</i> | <i>GmLac35</i> | 33011543-33014363 | 2820 | 0.549423281 | -0.202718258 |
| <i>Glyma.09G132400</i> | <i>GmLac35</i> | 33011543-33014363 | 2820 | 0.549423281 | -0.11183633  |
| <i>Glyma.10G197300</i> | <i>GmLac36</i> | 42857995-42860990 | 2995 | 0.520235126 | 0.078217301  |
| <i>Glyma.10G197300</i> | <i>GmLac36</i> | 42857995-42860990 | 989  | 0.520235126 | 0.048759811  |
| <i>Glyma.10G197300</i> | <i>GmLac36</i> | 42857995-42860990 | 2005 | 0.520235126 | -0.201035567 |
| <i>Glyma.10G219100</i> | <i>GmLac37</i> | 45096674-45100122 | 3448 | 0.520235126 | -0.210447125 |
| <i>Glyma.10G219100</i> | <i>GmLac37</i> | 45096674-45100122 | 3326 | 0.520235126 | -0.191074722 |
| <i>Glyma.10G219100</i> | <i>GmLac37</i> | 45096674-45100122 | 121  | 0.520235126 | -0.038794469 |
| <i>Glyma.10G219200</i> | <i>GmLac38</i> | 45102350-45106419 | 4069 | 0.520235126 | -0.210447125 |
| <i>Glyma.10G219200</i> | <i>GmLac38</i> | 45102350-45106419 | 4069 | 0.520235126 | -0.038794469 |
| <i>Glyma.10G263800</i> | <i>GmLac39</i> | 48805999-48811533 | 4001 | 0.520235126 | 0.067468873  |
| <i>Glyma.10G263800</i> | <i>GmLac39</i> | 48805999-48811533 | 5534 | 0.520235126 | 0.030011879  |
| <i>Glyma.10G263800</i> | <i>GmLac39</i> | 48805999-48811533 | 1532 | 0.520235126 | -0.010927732 |



|                        |                |                   |      |             |              |
|------------------------|----------------|-------------------|------|-------------|--------------|
| <i>Glyma.11G059200</i> | <i>GmLac40</i> | 4474609-4478620   | 4011 | 0.391354363 | 0.141525579  |
| <i>Glyma.11G059200</i> | <i>GmLac40</i> | 4474609-4478620   | 4011 | 0.391354363 | 0.133291008  |
| <i>Glyma.11G069500</i> | <i>GmLac41</i> | 5231970-5235047   | 3077 | 0.391354363 | 0.144216614  |
| <i>Glyma.11G069500</i> | <i>GmLac41</i> | 5231970-5235047   | 3077 | 0.391354363 | -0.004746135 |
| <i>Glyma.11G069600</i> | <i>GmLac42</i> | 5237575-5240089   | 2514 | 0.391354363 | 0.144216614  |
| <i>Glyma.11G069600</i> | <i>GmLac42</i> | 5237575-5240089   | 88   | 0.391354363 | 0.266249561  |
| <i>Glyma.11G069600</i> | <i>GmLac42</i> | 5237575-5240089   | 2425 | 0.391354363 | -0.004746135 |
| <i>Glyma.11G097300</i> | <i>GmLac43</i> | 7426344-7431229   | 3656 | 0.391354363 | 0.128625417  |
| <i>Glyma.11G097300</i> | <i>GmLac43</i> | 7426344-7431229   | 4885 | 0.391354363 | 0.158022642  |
| <i>Glyma.11G097300</i> | <i>GmLac43</i> | 7426344-7431229   | 1228 | 0.391354363 | 0.217670776  |
| <i>Glyma.11G137500</i> | <i>GmLac44</i> | 10456742-10461383 | 3258 | 0.391354363 | -0.159018358 |
| <i>Glyma.11G137500</i> | <i>GmLac44</i> | 10456742-10461383 | 4641 | 0.391354363 | -0.099543917 |
| <i>Glyma.11G137500</i> | <i>GmLac44</i> | 10456742-10461383 | 1382 | 0.391354363 | -0.034704912 |
| <i>Glyma.11G164000</i> | <i>GmLac45</i> | 15441595-15444592 | 2997 | 0.391354363 | 0.079675129  |
| <i>Glyma.11G164000</i> | <i>GmLac45</i> | 15441595-15444592 | 2997 | 0.391354363 | -0.066728199 |
| <i>Glyma.11G233400</i> | <i>GmLac46</i> | 32873226-32877927 | 4701 | 0.391354363 | -0.170099115 |
| <i>Glyma.11G233400</i> | <i>GmLac46</i> | 32873226-32877927 | 4701 | 0.391354363 | -0.146941854 |
| <i>Glyma.11G236800</i> | <i>GmLac47</i> | 33157016-33161441 | 2984 | 0.391354363 | 0.290607749  |
| <i>Glyma.11G236800</i> | <i>GmLac47</i> | 33157016-33161441 | 4425 | 0.391354363 | 0.521727963  |
| <i>Glyma.11G236800</i> | <i>GmLac47</i> | 33157016-33161441 | 1440 | 0.391354363 | 0.361217004  |
| <i>Glyma.11G256700</i> | <i>GmLac48</i> | 34639433-34641547 | 567  | 0.391354363 | 0.340917466  |
| <i>Glyma.11G256700</i> | <i>GmLac48</i> | 34639433-34641547 | 2114 | 0.391354363 | 0.289429263  |
| <i>Glyma.11G256700</i> | <i>GmLac48</i> | 34639433-34641547 | 1546 | 0.391354363 | 0.399135101  |
| <i>Glyma.12G023300</i> | <i>GmLac49</i> | 1711347-1715917   | 4570 | 0.381038111 | -0.064861898 |
| <i>Glyma.12G023300</i> | <i>GmLac49</i> | 1711347-1715917   | 4570 | 0.381038111 | -0.052116121 |
| <i>Glyma.12G060900</i> | <i>GmLac50</i> | 4423650-4427688   | 4038 | 0.381038111 | -0.21740435  |

|                        |                |                   |      |             |              |
|------------------------|----------------|-------------------|------|-------------|--------------|
| <i>Glyma.12G060900</i> | <i>GmLac50</i> | 4423650-4427688   | 4038 | 0.381038111 | -0.174714713 |
| <i>Glyma.12G097700</i> | <i>GmLac51</i> | 8390539-8395322   | 4783 | 0.381038111 | -0.1470188   |
| <i>Glyma.12G097700</i> | <i>GmLac51</i> | 8390539-8395322   | 4783 | 0.381038111 | -0.073696732 |
| <i>Glyma.12G121700</i> | <i>GmLac52</i> | 13091668-13095659 | 3991 | 0.381038111 | -0.327744638 |
| <i>Glyma.12G121700</i> | <i>GmLac52</i> | 13091668-13095659 | 3991 | 0.381038111 | -0.298553932 |
| <i>Glyma.12G192800</i> | <i>GmLac53</i> | 35434955-35439253 | 4298 | 0.381038111 | -0.21282648  |
| <i>Glyma.12G192800</i> | <i>GmLac53</i> | 35434955-35439253 | 4298 | 0.381038111 | 0.08416807   |
| <i>Glyma.13G033600</i> | <i>GmLac54</i> | 10575983-10578863 | 2880 | 0.560028083 | 0.294163644  |
| <i>Glyma.13G033600</i> | <i>GmLac54</i> | 10575983-10578863 | 2880 | 0.560028083 | 0.303725908  |
| <i>Glyma.13G076900</i> | <i>GmLac55</i> | 18197033-18205367 | 2967 | 0.560028083 | 0.610249562  |
| <i>Glyma.13G076900</i> | <i>GmLac55</i> | 18197033-18205367 | 8334 | 0.560028083 | 0.475854936  |
| <i>Glyma.13G076900</i> | <i>GmLac55</i> | 18197033-18205367 | 5366 | 0.560028083 | 0.263269574  |
| <i>Glyma.13G338100</i> | <i>GmLac56</i> | 43086954-43090229 | 3275 | 0.560028083 | -0.533209062 |
| <i>Glyma.13G338100</i> | <i>GmLac56</i> | 43086954-43090229 | 228  | 0.560028083 | -0.500508605 |
| <i>Glyma.13G338100</i> | <i>GmLac56</i> | 43086954-43090229 | 3046 | 0.560028083 | -0.497871593 |
| <i>Glyma.14G041300</i> | <i>GmLac57</i> | 3116248-3122893   | 3752 | 0.460699875 | 0.227995922  |
| <i>Glyma.14G041300</i> | <i>GmLac57</i> | 3116248-3122893   | 6645 | 0.460699875 | 0.272975961  |
| <i>Glyma.14G041300</i> | <i>GmLac57</i> | 3116248-3122893   | 2892 | 0.460699875 | 0.287314309  |
| <i>Glyma.14G056100</i> | <i>GmLac58</i> | 4452088-4456161   | 4073 | 0.460699875 | 0.049205612  |
| <i>Glyma.14G056100</i> | <i>GmLac58</i> | 4452088-4456161   | 4073 | 0.460699875 | 0.057482057  |
| <i>Glyma.14G062300</i> | <i>GmLac59</i> | 5075491-5079469   | 3978 | 0.460699875 | -0.083799924 |
| <i>Glyma.14G062300</i> | <i>GmLac59</i> | 5075491-5079469   | 3978 | 0.460699875 | -0.060233326 |
| <i>Glyma.14G191500</i> | <i>GmLac60</i> | 45616466-45620640 | 3534 | 0.460699875 | -0.119550234 |
| <i>Glyma.14G191500</i> | <i>GmLac60</i> | 45616466-45620640 | 4174 | 0.460699875 | 0.060327091  |
| <i>Glyma.14G191500</i> | <i>GmLac60</i> | 45616466-45620640 | 639  | 0.460699875 | -0.044074919 |
| <i>Glyma.14G198900</i> | <i>GmLac61</i> | 46404283-46407292 | 3009 | 0.460699875 | 0.17977      |

|                        |                |                   |      |             |              |
|------------------------|----------------|-------------------|------|-------------|--------------|
| <i>Glyma.14G198900</i> | <i>GmLac61</i> | 46404283-46407292 | 3009 | 0.460699875 | 0.226180081  |
| <i>Glyma.14G223000</i> | <i>GmLac62</i> | 48811743-48817333 | 5590 | 0.460699875 | -0.213614758 |
| <i>Glyma.14G223000</i> | <i>GmLac62</i> | 48811743-48817333 | 5590 | 0.460699875 | -0.109251317 |
| <i>Glyma.15G109000</i> | <i>GmLac63</i> | 8563266-8566506   | 3240 | 0.651790365 | 0.19142678   |
| <i>Glyma.15G109000</i> | <i>GmLac63</i> | 8563266-8566506   | 3240 | 0.651790365 | 0.149977324  |
| <i>Glyma.16G158400</i> | <i>GmLac64</i> | 31863760-31867327 | 3567 | 0.635639222 | 0.071821911  |
| <i>Glyma.16G158400</i> | <i>GmLac64</i> | 31863760-31867327 | 3567 | 0.635639222 | -0.030659266 |
| <i>Glyma.17G012300</i> | <i>GmLac65</i> | 950397-955232     | 4835 | 0.626645128 | -0.334883531 |
| <i>Glyma.17G012300</i> | <i>GmLac65</i> | 950397-955232     | 4835 | 0.626645128 | -0.329375442 |
| <i>Glyma.17G138300</i> | <i>GmLac66</i> | 11183728-11188961 | 5233 | 0.626645128 | -0.515333632 |
| <i>Glyma.17G138300</i> | <i>GmLac66</i> | 11183728-11188961 | 5233 | 0.626645128 | -0.178082971 |
| <i>Glyma.17G180400</i> | <i>GmLac67</i> | 20487778-20491962 | 2222 | 0.626645128 | 0.149421448  |
| <i>Glyma.17G180400</i> | <i>GmLac67</i> | 20487778-20491962 | 4184 | 0.626645128 | 0.246615423  |
| <i>Glyma.17G180400</i> | <i>GmLac67</i> | 20487778-20491962 | 1961 | 0.626645128 | 0.247395127  |
| <i>Glyma.17G180500</i> | <i>GmLac68</i> | 20576340-20582231 | 3660 | 0.626645128 | 0.499221882  |
| <i>Glyma.17G180500</i> | <i>GmLac68</i> | 20576340-20582231 | 5891 | 0.626645128 | 0.327656978  |
| <i>Glyma.17G180500</i> | <i>GmLac68</i> | 20576340-20582231 | 2230 | 0.626645128 | 0.262328062  |
| <i>Glyma.17G261500</i> | <i>GmLac69</i> | 41526584-41534998 | 4997 | 0.626645128 | -0.446526949 |
| <i>Glyma.17G261500</i> | <i>GmLac69</i> | 41526584-41534998 | 8414 | 0.626645128 | -0.403777598 |
| <i>Glyma.17G261500</i> | <i>GmLac69</i> | 41526584-41534998 | 3416 | 0.626645128 | -0.217843516 |
| <i>Glyma.18G023600</i> | <i>GmLac70</i> | 1723409-1728464   | 5055 | 0.644706686 | 0.009614116  |
| <i>Glyma.18G023600</i> | <i>GmLac70</i> | 1723409-1728464   | 5055 | 0.644706686 | 0.081700947  |
| <i>Glyma.18G057200</i> | <i>GmLac71</i> | 5045036-5048066   | 3030 | 0.644706686 | 0.107597867  |
| <i>Glyma.18G057200</i> | <i>GmLac71</i> | 5045036-5048066   | 3030 | 0.644706686 | 0.150813882  |
| <i>Glyma.18G065100</i> | <i>GmLac72</i> | 5925631-5930200   | 4369 | 0.644706686 | -0.482487682 |
| <i>Glyma.18G065100</i> | <i>GmLac72</i> | 5925631-5930200   | 4569 | 0.644706686 | -0.448910692 |

|                        |                |                   |      |             |              |
|------------------------|----------------|-------------------|------|-------------|--------------|
| <i>Glyma.18G065100</i> | <i>GmLac72</i> | 5925631-5930200   | 199  | 0.644706686 | -0.411355003 |
| <i>Glyma.18G177200</i> | <i>GmLac73</i> | 42244982-42247802 | 2820 | 0.644706686 | 0.214774922  |
| <i>Glyma.18G177200</i> | <i>GmLac73</i> | 42244982-42247802 | 2820 | 0.644706686 | 0.255236962  |
| <i>Glyma.18G177300</i> | <i>GmLac74</i> | 42252244-42255072 | 2828 | 0.644706686 | 0.255236962  |
| <i>Glyma.18G177300</i> | <i>GmLac74</i> | 42252244-42255072 | 2828 | 0.644706686 | 0.420674136  |
| <i>Glyma.18G177400</i> | <i>GmLac75</i> | 42324003-42327195 | 3192 | 0.644706686 | 0.232230428  |
| <i>Glyma.18G177400</i> | <i>GmLac75</i> | 42324003-42327195 | 3192 | 0.644706686 | 0.150945724  |
| <i>Glyma.18G183500</i> | <i>GmLac76</i> | 44265156-44269294 | 4138 | 0.644706686 | -0.38993793  |
| <i>Glyma.18G183500</i> | <i>GmLac76</i> | 44265156-44269294 | 4138 | 0.644706686 | -0.364118647 |
| <i>Glyma.18G183700</i> | <i>GmLac77</i> | 44276577-44279879 | 3302 | 0.644706686 | -0.364118647 |
| <i>Glyma.18G183700</i> | <i>GmLac77</i> | 44276577-44279879 | 3302 | 0.644706686 | -0.069409457 |
| <i>Glyma.18G193200</i> | <i>GmLac78</i> | 46559987-46565879 | 13   | 0.644706686 | -0.396495697 |
| <i>Glyma.18G193200</i> | <i>GmLac78</i> | 46559987-46565879 | 5892 | 0.644706686 | -0.357203169 |
| <i>Glyma.18G193200</i> | <i>GmLac78</i> | 46559987-46565879 | 5878 | 0.644706686 | -0.352765042 |
| <i>Glyma.18G193300</i> | <i>GmLac79</i> | 46576771-46581234 | 4463 | 0.644706686 | -0.358191923 |
| <i>Glyma.18G193300</i> | <i>GmLac79</i> | 46576771-46581234 | 3229 | 0.644706686 | -0.352765042 |
| <i>Glyma.18G193300</i> | <i>GmLac79</i> | 46576771-46581234 | 1233 | 0.644706686 | -0.255111141 |
| <i>Glyma.18G193400</i> | <i>GmLac80</i> | 46622868-46628926 | 6058 | 0.644706686 | -0.345635536 |
| <i>Glyma.18G193400</i> | <i>GmLac80</i> | 46622868-46628926 | 6058 | 0.644706686 | -0.327218565 |
| <i>Glyma.18G197400</i> | <i>GmLac81</i> | 47370198-47374339 | 4141 | 0.644706686 | -0.180201956 |
| <i>Glyma.18G197400</i> | <i>GmLac81</i> | 47370198-47374339 | 4141 | 0.644706686 | -0.139616532 |
| <i>Glyma.20G025200</i> | <i>GmLac82</i> | 2743092-2745282   | 2190 | 0.442490108 | -0.088156779 |
| <i>Glyma.20G025200</i> | <i>GmLac82</i> | 2743092-2745282   | 2190 | 0.442490108 | -0.066638725 |
| <i>Glyma.20G051600</i> | <i>GmLac83</i> | 11622159-11626958 | 4799 | 0.442490108 | -0.290535861 |
| <i>Glyma.20G051600</i> | <i>GmLac83</i> | 11622159-11626958 | 4799 | 0.442490108 | -0.178476929 |
| <i>Glyma.20G051700</i> | <i>GmLac84</i> | 11685747-11690052 | 4305 | 0.442490108 | -0.407695036 |

|                        |                |                   |      |             |              |
|------------------------|----------------|-------------------|------|-------------|--------------|
| <i>Glyma.20G051700</i> | <i>GmLac84</i> | 11685747-11690052 | 51   | 0.442490108 | -0.308811708 |
| <i>Glyma.20G051700</i> | <i>GmLac84</i> | 11685747-11690052 | 4253 | 0.442490108 | -0.302579087 |
| <i>Glyma.20G051900</i> | <i>GmLac85</i> | 11769051-11777145 | 949  | 0.442490108 | -0.330912835 |
| <i>Glyma.20G051900</i> | <i>GmLac85</i> | 11769051-11777145 | 8094 | 0.442490108 | -0.313453879 |
| <i>Glyma.20G051900</i> | <i>GmLac85</i> | 11769051-11777145 | 7144 | 0.442490108 | -0.155015417 |
| <i>Glyma.20G126500</i> | <i>GmLac86</i> | 36862931-36869680 | 6749 | 0.442490108 | 0.193884963  |
| <i>Glyma.20G126500</i> | <i>GmLac86</i> | 36862931-36869680 | 6749 | 0.442490108 | 0.208530564  |
| <i>Glyma.20G172600</i> | <i>GmLac87</i> | 41019363-41023633 | 637  | 0.442490108 | -0.106611509 |
| <i>Glyma.20G172600</i> | <i>GmLac87</i> | 41019363-41023633 | 4270 | 0.442490108 | 0.076546024  |
| <i>Glyma.20G172600</i> | <i>GmLac87</i> | 41019363-41023633 | 3632 | 0.442490108 | 0.01831549   |
| <i>Glyma.20G172700</i> | <i>GmLac88</i> | 41025526-41028921 | 3395 | 0.442490108 | 0.076546024  |
| <i>Glyma.20G172700</i> | <i>GmLac88</i> | 41025526-41028921 | 3395 | 0.442490108 | 0.01831549   |
| <i>Glyma.20G192800</i> | <i>GmLac89</i> | 43186683-43190491 | 3317 | 0.442490108 | 0.341192961  |
| <i>Glyma.20G192800</i> | <i>GmLac89</i> | 43186683-43190491 | 3808 | 0.442490108 | 0.280311067  |
| <i>Glyma.20G192800</i> | <i>GmLac89</i> | 43186683-43190491 | 490  | 0.442490108 | 0.015691069  |
| <i>Glyma.20G192900</i> | <i>GmLac90</i> | 43192981-43196211 | 3230 | 0.442490108 | 0.280311067  |
| <i>Glyma.20G192900</i> | <i>GmLac90</i> | 43192981-43196211 | 3230 | 0.442490108 | 0.015691069  |

Note: **Windows** indicate a 10kb region on chromosome; ***G.Soja*<sub>SNP</sub>** indicate SNP numbers obtained when comparing corresponding region between *G.soja* species with reference genome; ***PI*<sub>soja</sub>** indicate nucleotide diversity ( $\pi$ ) of a specific window in *G.soja* species; ***G.Max*<sub>SNP</sub>** indicate SNP numbers obtained when comparing corresponding region between *G.max* species with reference genome; ***PI*<sub>Max</sub>** indicate nucleotide diversity ( $\pi$ ) of a specific window in *G.max* species;  **$\pi_{Max/Soja} = PI_{Max} / PI_{soja}$** ; **Physical location** indicate chromosome location of a laccase gene; **Overlap** means overlap sequence length (bp) of a specific window and a laccase gene. **chr\_Mean ( $\pi_{Max/Soja}$ )** indicate the average  $\pi$  value of the a entire chromosome;  **$\Delta \pi_{Ratio} = \pi_{Max/Soja} - chr\_Mean(\pi_{Max/Soja})$** .

**Table S9b. List of selection *GmLacs* above average value.** (Table descriptions are listed at the bottom of the table)

|         |         |         |
|---------|---------|---------|
| GmLac1  | GmLac32 | GmLac59 |
| GmLac2  | GmLac33 | GmLac60 |
| GmLac7  | GmLac34 | GmLac62 |
| GmLac8  | GmLac35 | GmLac64 |
| GmLac10 | GmLac36 | GmLac65 |
| GmLac12 | GmLac37 | GmLac66 |
| GmLac13 | GmLac38 | GmLac69 |
| GmLac14 | GmLac39 | GmLac72 |
| GmLac17 | GmLac41 | GmLac76 |
| GmLac18 | GmLac42 | GmLac77 |
| GmLac19 | GmLac44 | GmLac78 |
| GmLac23 | GmLac45 | GmLac79 |
| GmLac22 | GmLac46 | GmLac80 |
| GmLac24 | GmLac49 | GmLac81 |
| GmLac25 | GmLac50 | GmLac82 |
| GmLac26 | GmLac51 | GmLac83 |
| GmLac27 | GmLac52 | GmLac84 |
| GmLac29 | GmLac53 | GmLac85 |
| GmLac31 | GmLac56 | GmLac87 |

The list shows the genes  $\Delta\pi_{\text{Ratio}} < \mathbf{0}$

**Table S9c. List of GmLacs experience selection pressure above top 5% genome-wide level.**

---

|                |                        |
|----------------|------------------------|
| <i>GmLac1</i>  | <i>Glyma.01G108200</i> |
| <i>GmLac8</i>  | <i>Glyma.02G261600</i> |
| <i>GmLac12</i> | <i>Glyma.05G056100</i> |
| <i>GmLac25</i> | <i>Glyma.07G225300</i> |
| <i>GmLac26</i> | <i>Glyma.07G225400</i> |
| <i>GmLac52</i> | <i>Glyma.12G121700</i> |
| <i>GmLac56</i> | <i>Glyma.13G338100</i> |
| <i>GmLac66</i> | <i>Glyma.17G138300</i> |
| <i>GmLac84</i> | <i>Glyma.20G051700</i> |
| <i>GmLac85</i> | <i>Glyma.20G051900</i> |

---

**Table S9d . Expression pattern of the 10 highly selected *GmLacs*.**

| <b>Gene name</b> | <b>Root</b> | <b>RH</b> | <b>Nodules</b> | <b>Pod</b> | <b>Seed</b> | <b>Stem</b> | <b>SAM</b> | <b>Leaves</b> | <b>Flower</b> | <b>scale(value)</b> |
|------------------|-------------|-----------|----------------|------------|-------------|-------------|------------|---------------|---------------|---------------------|
| GmLac1           | 41.64       | 4.94      | 6.82           | 0.06       | 0.00        | 0.04        | 0.01       | 0.03          | 0.14          | 0                   |
| GmLac8           | 2.95        | 4.36      | 3.94           | 7.97       | 0.69        | 32.58       | 0.56       | 0.98          | 1.91          | 5                   |
| GmLac12          | 54.73       | 65.77     | 60.52          | 23.36      | 22.16       | 47.63       | 55.08      | 6.07          | 5.52          | 10                  |
| GmLac25          | 0.20        | 0.00      | 0.00           | 0.01       | 0.00        | 1.06        | 0.20       | 0.03          | 505.03        | 15                  |
| GmLac26          | 0.00        | 0.00      | 0.00           | 0.00       | 0.00        | 0.06        | 0.00       | 0.00          | 22.85         | 20                  |
| GmLac52          | 0.18        | 0.59      | 0.63           | 4.39       | 0.46        | 1.15        | 0.01       | 0.23          | 0.10          | 25                  |
| GmLac56          | 0.00        | 0.00      | 0.00           | 1.37       | 0.00        | 0.00        | 0.21       | 0.00          | 0.02          | 30                  |
| GmLac66          | 66.83       | 56.05     | 48.36          | 56.52      | 35.88       | 84.13       | 43.27      | 8.40          | 9.79          |                     |
| GmLac84          | 23.66       | 2.72      | 2.76           | 0.15       | 0.09        | 1.48        | 0.06       | 0.14          | 0.33          |                     |
| GmLac85          | 93.65       | 67.15     | 30.28          | 32.47      | 44.21       | 48.51       | 13.49      | 12.04         | 2.55          |                     |

Note: Refer to Additional file 6 (sheet 1).



**Data S1. SNPs of the ten genes among 302 re-sequenced soybean accessions are publicly available at:**

<https://figshare.com/s/9066a35ea35bfaba4282>
